# Supplementary material for: Biocontrol endophytes Bacillus subtilis R31 influence the quality, transcriptome and metabolome of sweet corn
Source: PeerJ. 2023 Mar 2;11:e14967. doi: 10.7717/peerj.14967 (PMC9985898; doi:10.7717/peerj.14967)
Supplement: Supplemental Information 1 [file peerj-11-14967-s001.xlsx]

## Sheet: TableS1
Table S1 RNA-Seq data statistics of sweet corn after application of B. subtilis R31.
Sample	Raw Reads	Clean Reads	Clean Base(G)	Error Rate(%)	Q20(%)	Q30(%)	GC Content(%)
CK_1	57961128	56037306	8.41	0.03	97.77	93.74	55.75
CK_2	57143304	55411956	8.31	0.03	97.75	93.66	55.39
CK_3	51433258	49648460	7.45	0.03	97.78	93.78	55.87
R31_1	57887110	56092390	8.41	0.03	97.7	93.57	55.64
R31_2	55702466	53796148	8.07	0.03	97.79	93.79	55.71
R31_3	57537924	55635352	8.35	0.03	97.78	93.78	55.98

## Sheet: TableS2
Table S2 Unigenes NR databases annotation of sweet corn after application of B. subtilis R31.
ID	Annotation
gene-100272838	rubisco accumulation factor 1, chloroplastic [Zea mays]
gene-BA1	barren stalk 1 [Zea mays]
gene-CYP92C6	uncharacterized protein LOC100279968 [Zea mays]
gene-Dwarf1	GA 3-oxidase 1 [Zea mays]
gene-FEA4	uncharacterized protein LOC107403067 [Zea mays]
gene-GRF1	putative growth-regulating factor 1 isoform X1 [Zea mays]
gene-GRMZM2G028813	IQ-domain 5 [Zea mays]
gene-HDA108	unknown [Zea mays]
gene-IDP351	uncharacterized protein LOC100284280 [Zea mays]
gene-IDP755	D111/G-patch domain-containing protein [Zea mays]
gene-IDP798	unknown [Zea mays]
gene-IPT4	isopentenyl transferase IPT4 [Zea mays]
gene-KSL4	kaurene synthase1 [Zea mays]
gene-LOC100037738	GR2b protein [Zea mays]
gene-LOC100037740	myb-related protein Zm1-like [Zea mays]
gene-LOC100037746	transcription factor MYB41 [Zea mays]
gene-LOC100037748	elongation factor 1-alpha-like [Zea mays]
gene-LOC100037751	RecName: Full=Tubulin alpha-1 chain; AltName: Full=Alpha-1-tubulin AAC05717.1 alpha tubulin 1 [Eleusine indica]
gene-LOC100037755	R2R3 Myb transcription factor MYB-IF25 [Zea mays]
gene-LOC100037760	multidrug resistance protein associated 1 [Zea mays]
gene-LOC100037763	derlin-1.1 [Zea mays]
gene-LOC100037764	AGAMOUS-like protein [Zea mays]
gene-LOC100037765	glucan endo-1,3-beta-glucosidase, acidic isoform precursor [Zea mays]
gene-LOC100037767	cystatin 6 precursor [Zea mays]
gene-LOC100037768	transcription factor MYB31 [Zea mays]
gene-LOC100037774	glyceraldehyde-3-phosphate dehydrogenase4 [Zea mays]
gene-LOC100037775	acetyl-CoA carboxylase 2 isoform X1 [Zea mays]
gene-LOC100037776	plastid phosphate/phosphoenolpyruvate translocator1 [Zea mays]
gene-LOC100037778	17.8 kDa class II heat shock protein [Zea mays]
gene-LOC100037781	embryo surrounding region 1 precursor [Zea mays]
gene-LOC100037782	required to maintain repression 7 [Zea mays]
gene-LOC100037783	PTI1-like tyrosine-protein kinase 3 [Zea mays]
gene-LOC100037784	putative Pti1-like kinase isoform X1 [Zea mays]
gene-LOC100037785	ZCN1 [Zea mays]
gene-LOC100037786	WUS1 protein [Zea mays]
gene-LOC100037787	WUS2 protein [Zea mays]
gene-LOC100037791	delayed flowering1 [Zea mays]
gene-LOC100037792	uncharacterized protein LOC8079687 isoform X2 [Sorghum bicolor]
gene-LOC100037793	cytidine deaminase 2 [Zea mays]
gene-LOC100037794	respiratory burst oxidase2 [Zea mays]
gene-LOC100037796	putative protein kinase [Zea mays]
gene-LOC100037797	putative inositol-3-phosphate synthase [Zea mays]
gene-LOC100037798	brittle stalk-2-like protein 4 precursor [Zea mays]
gene-LOC100037799	brittle stalk-2-like protein 6 precursor [Zea mays]
gene-LOC100037800	brittle stalk-2-like protein 7 precursor [Zea mays]
gene-LOC100037801	brittle stalk-2-like protein 8 precursor [Zea mays]
gene-LOC100037812	aldo-keto reductase family 1, member B1 [Zea mays]
gene-LOC100037813	uncharacterized LOC100037813 precursor [Zea mays]
gene-LOC100037814	putative Bowman-Birk serine protease inhibitor precursor [Zea mays]
gene-LOC100037815	uncharacterized protein LOC100037815 [Zea mays]
gene-LOC100037816	protein IAL1 [Zea mays]
gene-LOC100037818	suppressors of mec-8 and unc-52 [Zea mays]
gene-LOC100037819	protein SUPPRESSOR OF GENE SILENCING 3 homolog [Zea mays]
gene-LOC100037820	uncharacterized protein LOC100037820 isoform X1 [Zea mays]
gene-LOC100037821	defective18 [Zea mays]
gene-LOC100037822	aluminum-induced transporter isoform X1 [Zea mays]
gene-LOC100037824	maize insect resistance3 [Zea mays]
gene-LOC100037826	rolled leaf 2 isoform X1 [Zea mays]
gene-LOC100037827	Chloroplast post-illumination chlorophyll fluorescence increase protein [Zea mays]
gene-LOC100037828	brittle stalk-2-like protein 5 precursor [Zea mays]
gene-LOC100037830	1-Cys peroxiredoxin PER1 [Zea mays]
gene-LOC100038320	KANADI1 [Zea mays]
gene-LOC100101505	female gametophyte-specific protein ES2 precursor [Zea mays]
gene-LOC100101510	uncharacterized protein LOC100101510 [Zea mays]
gene-LOC100101512	myb transcription factor39 [Zea mays]
gene-LOC100101513	transcription factor MYB42 [Zea mays]
gene-LOC100101525	cysteine proteinase inhibitor [Zea mays]
gene-LOC100101526	starch synthase IIb-2 precursor isoform X1 [Zea mays]
gene-LOC100101527	starch synthase IIIb-1 precursor [Zea mays]
gene-LOC100101528	Starch synthase 3 chloroplastic/amyloplastic [Zea mays]
gene-LOC100101530	chromatin assembly factor 1 subunit FSM [Zea mays]
gene-LOC100101531	plastid ADP-glucose pyrophosphorylase large subunit [Zea mays]
gene-LOC100101532	respiratory burst oxidase3 [Zea mays]
gene-LOC100101533	peroxidase 42 Precursor precursor [Zea mays]
gene-LOC100101536	putative growth-regulating factor 3 isoform X1 [Zea mays]
gene-LOC100101537	unknown [Zea mays]
gene-LOC100101538	putative growth-regulating factor 5 isoform X1 [Zea mays]
gene-LOC100101539	putative growth-regulating factor 6 [Zea mays]
gene-LOC100101540	GRF transcription factor, partial [Zea mays]
gene-LOC100101542	putative growth-regulating factor 10 [Zea mays]
gene-LOC100101543	Growth-regulating factor 6 [Zea mays]
gene-LOC100101544	putative GRF-interacting factor 1 [Zea mays]
gene-LOC100101545	putative GRF-interacting factor 2 [Zea mays]
gene-LOC100101546	GRF1-interacting factor 3 [Zea mays]
gene-LOC100101547	omega-6 fatty acid desaturase, chloroplastic [Zea mays]
gene-LOC100101548	rootless concerning crown and seminal roots 1 [Zea mays]
gene-LOC100101549	RTCS-like1 [Zea mays]
gene-LOC100125634	protein MATERNALLY EXPRESSED GENE 2 precursor [Zea mays]
gene-LOC100125635	transcription factor MYB8 [Zea mays]
gene-LOC100125638	granule bound starch synthase IIa precursor [Zea mays]
gene-LOC100125639	peroxidase 70 isoform X1 [Zea mays]
gene-LOC100125640	hypothetical protein [Zea mays]
gene-LOC100125641	putative growth-regulating factor 7 isoform X1 [Zea mays]
gene-LOC100125642	putative growth-regulating factor 12 isoform X1 [Zea mays]
gene-LOC100125643	unknown [Zea mays]
gene-LOC100125644	putative growth-regulating factor 14 [Zea mays]
gene-LOC100125645	uncharacterized protein LOC100125645 [Zea mays]
gene-LOC100125646	caffeic acid 3-O-methyltransferase [Zea mays]
gene-LOC100125647	Organic cation/carnitine transporter 7 [Zea mays]
gene-LOC100125648	Mre11B protein [Zea mays]
gene-LOC100125649	terpene synthase26 [Zea mays]
gene-LOC100125650	barren inflorescence 2 [Zea mays]
gene-LOC100125653	r-interacting factor 1 [Zea mays]
gene-LOC100125654	ribonuclease III domain-containing protein RNC1, chloroplastic [Zea mays]
gene-LOC100125655	ATP-dependent Clp protease proteolytic subunit 2 [Zea mays]
gene-LOC100125656	PL3K2 [Zea mays]
gene-LOC100125657	ADP glucose pyrophosphorylase large subunit leaf2 [Zea mays]
gene-LOC100125658	uncharacterized protein LOC100125658 precursor [Zea mays]
gene-LOC100125659	multidrug resistance-associated protein 4 [Zea mays]
gene-LOC100126359	CRM-domain containing factor CFM2, chloroplastic isoform X1 [Zea mays]
gene-LOC100126360	CRM-domain containing factor CFM3, chloroplastic/mitochondrial [Zea mays]
gene-LOC100126361	pentatricopeptide repeat-containing protein PPR5, chloroplastic [Zea mays]
gene-LOC100126363	uncharacterized protein LOC100126363 [Zea mays]
gene-LOC100126364	protein FLOURY 1 [Zea mays]
gene-LOC100126430	RecName: Full=Protein ABERRANT POLLEN TRANSMISSION 1; Flags: Precursor
gene-LOC100126542	H+-translocating pyrophosphatase isoform X1 [Zea mays]
gene-LOC100126801	uncharacterized LOC100126801 isoform X1 [Zea mays]
gene-LOC100126886	acyl carrier protein 1 [Zea mays]
gene-LOC100126887	cytochrome P450 78A1 [Zea mays]
gene-LOC100126898	knotted1 induced 1 precursor [Zea mays]
gene-LOC100126901	ferric-chelate reductase (NADH)2 [Zea mays]
gene-LOC100126902	kinesin-like protein 2 [Zea mays]
gene-LOC100126914	ribosome inactivating protein [Zea mays]
gene-LOC100126915	uncharacterized LOC100126915 [Zea mays]
gene-LOC100126928	chromatin complex subunit A [Zea mays]
gene-LOC100126935	uncharacterized protein LOC100126935 isoform X1 [Zea mays]
gene-LOC100126941	uncharacterized LOC100126941 [Zea mays]
gene-LOC100126948	putative defensin [Zea mays]
gene-LOC100126965	uncharacterized LOC100126965 isoform X1 [Zea mays]
gene-LOC100126971	ethylene receptor1-25 [Zea mays]
gene-LOC100127010	leucoanthocyanidin dioxygenase [Zea mays]
gene-LOC100127013	NADH-ubiquinone oxidoreductase 20 kDa subunit [Zea mays]
gene-LOC100127014	herbicide safener binding protein 1 [Zea mays]
gene-LOC100127017	ras-related protein Rab-2-A [Zea mays]
gene-LOC100127494	ras-related protein Rab-2-B [Zea mays]
gene-LOC100127507	hypothetical protein PAHAL_G00169 [Panicum hallii]
gene-LOC100127508	uncharacterized protein LOC100127508 [Zea mays]
gene-LOC100127509	uncharacterized protein LOC100127509 [Zea mays]
gene-LOC100127510	diacylglycerol kinase 3 isoform X1 [Zea mays]
gene-LOC100127511	putative wuschel homeobox protein [Zea mays]
gene-LOC100127513	ZCN2 protein [Zea mays]
gene-LOC100127514	ZCN3 protein [Zea mays]
gene-LOC100127515	ZCN4 protein [Zea mays]
gene-LOC100127516	ZCN5 [Zea mays]
gene-LOC100127517	ZCN6 [Zea mays]
gene-LOC100127518	ZCN7 protein [Zea mays]
gene-LOC100127519	ZCN8 [Zea mays]
gene-LOC100127520	ZCN9 protein [Zea mays]
gene-LOC100127521	ZCN10 protein [Zea mays]
gene-LOC100127522	uncharacterized protein LOC100127522 [Zea mays]
gene-LOC100127524	uncharacterized protein LOC100127524 [Zea mays]
gene-LOC100127525	ZCN16 protein [Zea mays]
gene-LOC100127526	ZCN17 protein [Zea mays]
gene-LOC100127527	ZCN18 protein isoform X1 [Zea mays]
gene-LOC100127528	ZCN19 protein [Zea mays]
gene-LOC100127529	protein TWIN SISTER of FT [Zea mays]
gene-LOC100127530	ZCN25 protein [Zea mays]
gene-LOC100127531	DELLA protein DWARF8-like [Zea mays]
gene-LOC100127532	unknown [Zea mays]
gene-LOC100127534	uncharacterized protein LOC100127534 [Zea mays]
gene-LOC100127535	AN17 [Zea mays]
gene-LOC100127538	ZCN11 [Zea mays]
gene-LOC100127539	uncharacterized protein LOC100127539 [Zea mays]
gene-LOC100127541	uncharacterized protein LOC100127541 [Zea mays]
gene-LOC100135421	uncharacterized protein LOC100135421 isoform X1 [Zea mays]
gene-LOC100135422	uncharacterized LOC100135422 [Zea mays]
gene-LOC100136826	phosphatidylinositol synthase 2 isoform X1 [Zea mays]
gene-LOC100136827	phosphoinositide-specific phospholipase C isoform X1 [Zea mays]
gene-LOC100136828	Starch synthase IIc [Zea mays]
gene-LOC100136878	starch branching enzyme III [Zea mays]
gene-LOC100136879	early responsive to dehydration protein [Zea mays]
gene-LOC100136880	respiratory burst oxidase-like protein D [Zea mays]
gene-LOC100136881	monofunctional aspartate kinase 2 [Zea mays]
gene-LOC100136882	phytoene synthase, chloroplastic [Zea mays]
gene-LOC100136884	probable receptor-like protein kinase At1g30570 [Zea mays]
gene-LOC100136885	superoxide dismutase [Zea mays]
gene-LOC100141385	CBL-interacting protein kinase [Zea mays]
gene-LOC100144300	uncharacterized protein LOC100144300 [Zea mays]
gene-LOC100144301	thymidine kinase [Zea mays]
gene-LOC100147731	TRIBOA-glucoside O-methyltransferase BX7 [Zea mays]
gene-LOC100147733	gigantea like1a [Zea mays]
gene-LOC100147734	uncharacterized protein LOC100147734 isoform X1 [Zea mays]
gene-LOC100147735	filamentation temperature-sensitive H 2B [Zea mays]
gene-LOC100147736	constans 1 isoform 1 [Zea mays]
gene-LOC100147737	WRKY DNA-binding protein [Zea mays]
gene-LOC100147738	RecName: Full=Probable glutamate carboxypeptidase VP8; AltName: Full=Protein VIVIPAROUS8; AltName: Full=Protein WIDOW'S PEAK 1 ONM10079.1 Putative membrane localized peptidase [Zea mays]
gene-LOC100158226	isopentenyl transferase IPT5 [Zea mays]
gene-LOC100158231	isopentenyl transferase IPT1 [Zea mays]
gene-LOC100170234	uncharacterized protein LOC100170234 [Zea mays]
gene-LOC100170235	single-stranded DNA-binding protein WHY1, chloroplastic [Zea mays]
gene-LOC100170236	starch synthase4 [Zea mays]
gene-LOC100170237	putative bifunctional nuclease precursor [Zea mays]
gene-LOC100170238	tryptophan synthase alpha [Zea mays]
gene-LOC100170239	trehalose-6-phosphate synthase isoform X1 [Zea mays]
gene-LOC100170241	ubiquitin ligase SINAT3 [Zea mays]
gene-LOC100170242	ubiquitin ligase SINAT3 [Zea mays]
gene-LOC100170243	uncharacterized protein LOC100170243 [Zea mays]
gene-LOC100170244	putative seven in absentia domain family protein isoform X1 [Zea mays]
gene-LOC100170245	unknown [Zea mays]
gene-LOC100170246	hexokinase2 [Zea mays]
gene-LOC100170248	hexose transporter isoform X1 [Zea mays]
gene-LOC100170249	unknown [Zea mays]
gene-LOC100170250	starch synthase V [Zea mays]
gene-LOC100170665	NAC1 transcription factor [Zea mays]
gene-LOC100174970	isopentenyl transferase isoform X1 [Zea mays]
gene-LOC100174971	unknown [Zea mays]
gene-LOC100174972	dhurrinase-like B-glucosidase [Zea mays]
gene-LOC100191140	Porphobilinogen deaminase chloroplastic [Zea mays]
gene-LOC100191141	jasmonate-induced protein [Zea mays]
gene-LOC100191142	uncharacterized LOC100191142 isoform X1 [Zea mays]
gene-LOC100191143	uncharacterized protein LOC100191143 [Zea mays]
gene-LOC100191144	uncharacterized protein LOC100191144 precursor [Zea mays]
gene-LOC100191145	putative thioredoxin superfamily protein [Zea mays]
gene-LOC100191146	Glycine-rich RNA-binding protein 3 mitochondrial [Zea mays]
gene-LOC100191147	uncharacterized protein LOC100191147 isoform X1 [Zea mays]
gene-LOC100191148	uncharacterized protein LOC100191148 [Zea mays]
gene-LOC100191149	Methionine aminopeptidase 1D chloroplastic/mitochondrial [Zea mays]
gene-LOC100191150	uncharacterized protein LOC100191150 precursor [Zea mays]
gene-LOC100191151	uncharacterized protein LOC100857042 precursor [Zea mays]
gene-LOC100191152	uncharacterized protein LOC100191152 [Zea mays]
gene-LOC100191153	uncharacterized protein LOC100191153 [Zea mays]
gene-LOC100191154	uncharacterized protein LOC100191154 [Zea mays]
gene-LOC100191155	uncharacterized protein LOC100191155 [Zea mays]
gene-LOC100191156	splicing factor, arginine/serine-rich 2 [Zea mays]
gene-LOC100191157	RHC1A [Zea mays]
gene-LOC100191158	uncharacterized protein LOC100191158 [Zea mays]
gene-LOC100191159	uncharacterized protein LOC100191159 [Zea mays]
gene-LOC100191160	uncharacterized protein LOC100191160 [Zea mays]
gene-LOC100191161	uncharacterized LOC100191161 [Zea mays]
gene-LOC100191162	uncharacterized protein LOC100191162 [Zea mays]
gene-LOC100191163	multipolar spindle 1 [Zea mays]
gene-LOC100191164	uncharacterized protein LOC100191164 isoform X1 [Zea mays]
gene-LOC100191165	2-dehydro-3-deoxyphosphooctonate aldolase [Zea mays]
gene-LOC100191166	uncharacterized protein LOC100191166 isoform X1 [Zea mays]
gene-LOC100191167	uncharacterized protein LOC100191167 [Zea mays]
gene-LOC100191168	uncharacterized protein LOC100191168 [Zea mays]
gene-LOC100191169	uncharacterized protein LOC100191169 [Zea mays]
gene-LOC100191170	putative WRKY DNA-binding domain superfamily protein [Zea mays]
gene-LOC100191171	uncharacterized protein LOC100191171 [Zea mays]
gene-LOC100191172	uncharacterized protein LOC100191172 [Zea mays]
gene-LOC100191173	unknown [Zea mays]
gene-LOC100191174	unknown [Zea mays]
gene-LOC100191175	TCP transcription factor [Zea mays]
gene-LOC100191176	unknown [Zea mays]
gene-LOC100191177	uncharacterized protein LOC100191177 [Zea mays]
gene-LOC100191178	uncharacterized protein LOC100191178 precursor [Zea mays]
gene-LOC100191179	uncharacterized protein LOC100191179 [Zea mays]
gene-LOC100191180	putative RING zinc finger domain superfamily protein isoform X1 [Zea mays]
gene-LOC100191181	uncharacterized protein LOC100191181 [Zea mays]
gene-LOC100191182	putative bZIP transcription factor superfamily protein [Zea mays]
gene-LOC100191183	uncharacterized protein LOC100191183 isoform X1 [Zea mays]
gene-LOC100191184	reticulon [Zea mays]
gene-LOC100191185	zinc finger C-x8-C-x5-C-x3-H type family protein [Zea mays]
gene-LOC100191186	uncharacterized protein LOC100191186 isoform X1 [Zea mays]
gene-LOC100191187	UBA/TS-N domain-containing protein [Zea mays]
gene-LOC100191188	uncharacterized protein LOC100191188 [Zea mays]
gene-LOC100191189	uncharacterized protein LOC100191189 [Zea mays]
gene-LOC100191190	uncharacterized protein LOC100191190 [Zea mays]
gene-LOC100191191	uncharacterized protein LOC100191191 [Zea mays]
gene-LOC100191192	uncharacterized protein LOC100191192 [Zea mays]
gene-LOC100191193	uncharacterized protein LOC100191193 [Zea mays]
gene-LOC100191194	acid phosphatase 1 precursor [Zea mays]
gene-LOC100191195	uncharacterized protein LOC100191195 [Zea mays]
gene-LOC100191197	uncharacterized protein LOC100191197 precursor [Zea mays]
gene-LOC100191198	uncharacterized protein LOC100191198 [Zea mays]
gene-LOC100191199	putative serine/threonine protein phosphatase superfamily protein [Zea mays]
gene-LOC100191200	uncharacterized protein LOC100191200 precursor [Zea mays]
gene-LOC100191201	glycerophosphodiester phosphodiesterase [Zea mays]
gene-LOC100191202	uncharacterized protein LOC100191202 [Zea mays]
gene-LOC100191203	uncharacterized protein LOC100191203 [Zea mays]
gene-LOC100191204	uncharacterized protein LOC100191204 [Zea mays]
gene-LOC100191205	uncharacterized protein LOC100191205 [Zea mays]
gene-LOC100191206	putative WRKY DNA-binding domain superfamily protein [Zea mays]
gene-LOC100191207	uncharacterized protein LOC100191207 [Zea mays]
gene-LOC100191208	uncharacterized protein LOC100191208 [Zea mays]
gene-LOC100191210	uncharacterized protein LOC100191210 [Zea mays]
gene-LOC100191211	putative bZIP transcription factor superfamily protein [Zea mays]
gene-LOC100191212	DNAJ heat shock family protein [Zea mays]
gene-LOC100191213	uncharacterized protein LOC100191213 [Zea mays]
gene-LOC100191214	uncharacterized protein LOC100191214 [Zea mays]
gene-LOC100191215	uncharacterized protein LOC100191215 [Zea mays]
gene-LOC100191216	uncharacterized protein LOC100191216 isoform X1 [Zea mays]
gene-LOC100191217	uncharacterized protein LOC100191217 precursor [Zea mays]
gene-LOC100191218	putative FAD-binding Berberine family protein precursor [Zea mays]
gene-LOC100191220	uncharacterized protein LOC100191220 [Zea mays]
gene-LOC100191221	uncharacterized protein LOC100191221 isoform X1 [Zea mays]
gene-LOC100191222	uncharacterized protein LOC100191222 [Zea mays]
gene-LOC100191223	Syntaxin 23 [Zea mays]
gene-LOC100191224	proteasome subunit alpha type [Zea mays]
gene-LOC100191225	uncharacterized protein LOC100191225 isoform X1 [Zea mays]
gene-LOC100191226	putative protein kinase superfamily protein isoform 1 [Zea mays]
gene-LOC100191227	phosphatase phospho 1 [Zea mays]
gene-LOC100191228	Endonuclease/Exonuclease/phosphatase family [Zea mays]
gene-LOC100191229	uncharacterized LOC100191229 [Zea mays]
gene-LOC100191230	exopolygalacturonase precursor [Zea mays]
gene-LOC100191231	RNA-binding (RRM/RBD/RNP motifs) family protein [Zea mays]
gene-LOC100191232	uncharacterized protein LOC100191232 [Zea mays]
gene-LOC100191233	putative bZIP transcription factor superfamily protein [Zea mays]
gene-LOC100191234	Diaminopimelate epimerase chloroplastic [Zea mays]
gene-LOC100191235	uncharacterized protein LOC100191235 isoform X1 [Zea mays]
gene-LOC100191236	uncharacterized protein LOC100191236 [Zea mays]
gene-LOC100191237	putative glyoxalase family protein isoform X1 [Zea mays]
gene-LOC100191238	unknown [Zea mays]
gene-LOC100191239	putative protein kinase superfamily protein [Zea mays]
gene-LOC100191240	uncharacterized protein LOC100191240 [Zea mays]
gene-LOC100191241	uncharacterized LOC100191241 isoform X1 [Zea mays]
gene-LOC100191242	uncharacterized protein LOC100191242 [Zea mays]
gene-LOC100191243	uncharacterized LOC100191243 isoform X1 [Zea mays]
gene-LOC100191244	uncharacterized protein LOC100191244 [Zea mays]
gene-LOC100191245	uncharacterized protein LOC100191245 precursor [Zea mays]
gene-LOC100191246	uncharacterized protein LOC100191246 [Zea mays]
gene-LOC100191247	uncharacterized protein LOC100191247 [Zea mays]
gene-LOC100191248	chaperonin [Zea mays]
gene-LOC100191249	uncharacterized protein LOC100191249 [Zea mays]
gene-LOC100191250	phosphoglycerate mutase-like protein isoform X1 [Zea mays]
gene-LOC100191251	unknown [Zea mays]
gene-LOC100191252	uncharacterized protein LOC100191252 [Zea mays]
gene-LOC100191253	uncharacterized LOC100191253 [Zea mays]
gene-LOC100191254	putative serine/threonine protein phosphatase superfamily protein isoform X1 [Zea mays]
gene-LOC100191255	uncharacterized LOC100191255 isoform X1 [Zea mays]
gene-LOC100191256	uncharacterized protein LOC100191256 [Zea mays]
gene-LOC100191257	uncharacterized protein LOC100191257 [Zea mays]
gene-LOC100191258	uncharacterized protein LOC100191258 isoform X1 [Zea mays]
gene-LOC100191259	uncharacterized LOC100191259 precursor [Zea mays]
gene-LOC100191260	repressor protein [Zea mays]
gene-LOC100191261	uncharacterized protein LOC100191261 [Zea mays]
gene-LOC100191262	uncharacterized protein LOC100191262 [Zea mays]
gene-LOC100191263	uncharacterized protein LOC100191263 isoform X1 [Zea mays]
gene-LOC100191264	uncharacterized protein LOC100191264 [Zea mays]
gene-LOC100191265	putative trehalose phosphatase/synthase family protein [Zea mays]
gene-LOC100191266	uncharacterized protein LOC100191266 [Zea mays]
gene-LOC100191267	protein APE1 [Zea mays]
gene-LOC100191268	uncharacterized protein LOC100191268 [Zea mays]
gene-LOC100191269	clathrin binding protein isoform X1 [Zea mays]
gene-LOC100191270	uncharacterized protein LOC100191270 [Zea mays]
gene-LOC100191271	uncharacterized protein LOC100191271 [Zea mays]
gene-LOC100191272	4-nitrophenylphosphatase [Zea mays]
gene-LOC100191273	uncharacterized protein LOC100191273 precursor [Zea mays]
gene-LOC100191274	uncharacterized protein LOC100191274 [Zea mays]
gene-LOC100191275	uncharacterized protein LOC100191275 [Zea mays]
gene-LOC100191276	uncharacterized LOC100191276 isoform X2 [Zea mays]
gene-LOC100191277	clathrin assembly protein [Zea mays]
gene-LOC100191278	cupin, RmlC-type [Zea mays]
gene-LOC100191279	uncharacterized protein LOC100191279 [Zea mays]
gene-LOC100191280	putative snRK/SAPK family protein kinase [Zea mays]
gene-LOC100191281	uncharacterized protein LOC100191281 [Zea mays]
gene-LOC100191282	3-hydroxybutyryl-CoA dehydrogenase [Zea mays]
gene-LOC100191283	uncharacterized protein LOC100191283 [Zea mays]
gene-LOC100191284	Short-chain dehydrogenase/reductase SDR [Zea mays]
gene-LOC100191285	uncharacterized protein LOC100191285 isoform X1 [Zea mays]
gene-LOC100191286	uncharacterized protein LOC100191286 [Zea mays]
gene-LOC100191287	uncharacterized protein LOC100191287 [Zea mays]
gene-LOC100191288	Jasmonate O-methyltransferase [Zea mays]
gene-LOC100191289	uncharacterized protein LOC100191289 [Zea mays]
gene-LOC100191290	10-deacetylbaccatin III 10-O-acetyltransferase [Zea mays]
gene-LOC100191291	putative aurora-related protein kinase family protein [Zea mays]
gene-LOC100191292	putative RING zinc finger domain superfamily protein [Zea mays]
gene-LOC100191293	uncharacterized protein LOC100191293 [Zea mays]
gene-LOC100191294	Peptidase family M48 family protein [Zea mays]
gene-LOC100191295	uncharacterized protein LOC100191295 [Zea mays]
gene-LOC100191296	uncharacterized protein LOC100191296 [Zea mays]
gene-LOC100191297	uncharacterized protein LOC100191297 isoform X2 [Zea mays]
gene-LOC100191298	uncharacterized protein LOC100191298 [Zea mays]
gene-LOC100191299	uncharacterized protein LOC100191299 [Zea mays]
gene-LOC100191300	uncharacterized protein LOC100191300 [Zea mays]
gene-LOC100191301	uncharacterized protein LOC100191301 [Zea mays]
gene-LOC100191302	uncharacterized protein LOC100191302 [Zea mays]
gene-LOC100191303	uncharacterized protein LOC100191303 precursor [Zea mays]
gene-LOC100191304	uncharacterized protein LOC100191304 precursor [Zea mays]
gene-LOC100191305	uncharacterized protein LOC100191305 [Zea mays]
gene-LOC100191306	uncharacterized protein LOC100191306 [Zea mays]
gene-LOC100191307	uncharacterized protein LOC100191307 precursor [Zea mays]
gene-LOC100191308	uncharacterized protein LOC100191308 [Zea mays]
gene-LOC100191309	FHY1 [Zea mays]
gene-LOC100191310	uncharacterized protein LOC100191310 [Zea mays]
gene-LOC100191311	uncharacterized protein LOC100191311 [Zea mays]
gene-LOC100191312	Deoxyhypusine hydroxylase [Zea mays]
gene-LOC100191313	uncharacterized protein LOC100191313 [Zea mays]
gene-LOC100191314	uncharacterized protein LOC100191314 [Zea mays]
gene-LOC100191315	uncharacterized LOC100191315 isoform X1 [Zea mays]
gene-LOC100191316	uncharacterized protein LOC100191316 isoform 1 [Zea mays]
gene-LOC100191317	TGF-beta-inducible nuclear protein 1 [Zea mays]
gene-LOC100191319	uncharacterized protein LOC100191319 isoform X1 [Zea mays]
gene-LOC100191320	T-complex protein 1 subunit beta [Zea mays]
gene-LOC100191321	1-aminocyclopropane-1-carboxylate oxidase 1Acc oxidase [Zea mays]
gene-LOC100191322	uncharacterized protein LOC100191322 isoform X1 [Zea mays]
gene-LOC100191323	unknown [Zea mays]
gene-LOC100191324	uncharacterized protein LOC100191324 [Zea mays]
gene-LOC100191325	uncharacterized LOC100191325 [Zea mays]
gene-LOC100191326	uncharacterized LOC100191326 [Zea mays]
gene-LOC100191327	uncharacterized protein LOC100191327 [Zea mays]
gene-LOC100191328	delta-12 fatty acid desaturaseFAD2 [Zea mays]
gene-LOC100191329	uncharacterized protein LOC100191329 [Zea mays]
gene-LOC100191330	uncharacterized protein LOC100191330 [Zea mays]
gene-LOC100191331	uncharacterized protein LOC100191331 [Zea mays]
gene-LOC100191332	uncharacterized protein LOC100191332 isoform X1 [Zea mays]
gene-LOC100191333	uncharacterized protein LOC100191333 [Zea mays]
gene-LOC100191334	Retrovirus-related Pol polyprotein LINE-1 [Zea mays]
gene-LOC100191335	cytochrome b5 reductase [Zea mays]
gene-LOC100191336	CF9 [Zea mays]
gene-LOC100191337	uncharacterized protein LOC100191337 [Zea mays]
gene-LOC100191338	uncharacterized protein LOC100191338 [Zea mays]
gene-LOC100191339	Protein DOWNY MILDEW RESISTANCE 6 [Zea mays]
gene-LOC100191340	uncharacterized protein LOC100191340 [Zea mays]
gene-LOC100191341	uncharacterized protein LOC100191341 [Zea mays]
gene-LOC100191342	uncharacterized protein LOC100191342 [Zea mays]
gene-LOC100191343	uncharacterized protein LOC100191343 [Zea mays]
gene-LOC100191344	uncharacterized protein LOC100191344 [Zea mays]
gene-LOC100191345	uncharacterized protein LOC100191345 [Zea mays]
gene-LOC100191347	carboxy-lyase [Zea mays]
gene-LOC100191348	Bifunctional D-cysteine desulfhydrase/1-aminocyclopropane-1-carboxylate deaminase mitochondrial [Zea mays]
gene-LOC100191349	GDP-mannose transporter GONST4 [Zea mays]
gene-LOC100191350	fruit protein PKIWI502 [Zea mays]
gene-LOC100191351	uncharacterized protein LOC100191351 precursor [Zea mays]
gene-LOC100191352	uncharacterized protein LOC100191352 isoform X1 [Zea mays]
gene-LOC100191353	uncharacterized protein LOC100191353 [Zea mays]
gene-LOC100191354	mitochondrial carrier protein CoAc2 [Zea mays]
gene-LOC100191355	TMV-MP30 binding protein 2C isoform X1 [Zea mays]
gene-LOC100191356	peroxisomal carrier protein [Zea mays]
gene-LOC100191357	ATP binding protein [Zea mays]
gene-LOC100191358	predicted protein [Hordeum vulgare subsp. vulgare]
gene-LOC100191359	putative Ser/Thr protein phosphatase family protein isoform X1 [Zea mays]
gene-LOC100191360	uncharacterized protein LOC100191360 isoform X1 [Zea mays]
gene-LOC100191361	uncharacterized protein LOC100191361 [Zea mays]
gene-LOC100191362	uncharacterized protein LOC100191362 [Zea mays]
gene-LOC100191363	Sec14p-like phosphatidylinositol transfer family protein [Zea mays]
gene-LOC100191364	Nudix hydrolase 16 mitochondrial [Zea mays]
gene-LOC100191365	uncharacterized LOC100191365 [Zea mays]
gene-LOC100191366	uncharacterized protein LOC100191366 [Zea mays]
gene-LOC100191367	uncharacterized protein LOC100191367 [Zea mays]
gene-LOC100191368	uncharacterized protein LOC100191368 [Zea mays]
gene-LOC100191370	unknown [Zea mays]
gene-LOC100191372	uncharacterized protein LOC100191372 [Zea mays]
gene-LOC100191373	Protein LIKE COV 2 [Zea mays]
gene-LOC100191374	uncharacterized protein LOC100191374 [Zea mays]
gene-LOC100191375	IM30 protein-like protein [Zea mays]
gene-LOC100191376	COP9 signalosome complex subunit 7 [Zea mays]
gene-LOC100191377	uncharacterized protein LOC100191377 [Zea mays]
gene-LOC100191378	uncharacterized protein LOC100191378 [Zea mays]
gene-LOC100191379	uncharacterized LOC100191379 [Zea mays]
gene-LOC100191380	uncharacterized protein LOC100191380 precursor [Zea mays]
gene-LOC100191381	uncharacterized protein LOC100191381 [Zea mays]
gene-LOC100191382	Vacuolar protein sorting-associated protein 32 homolog 1 [Zea mays]
gene-LOC100191383	uncharacterized protein LOC100191383 [Zea mays]
gene-LOC100191384	uncharacterized protein LOC100191384 [Zea mays]
gene-LOC100191385	salt-inducible protein [Zea mays]
gene-LOC100191386	uncharacterized LOC100191386 [Zea mays]
gene-LOC100191387	uncharacterized protein LOC100191387 isoform X1 [Zea mays]
gene-LOC100191388	uncharacterized protein LOC100191388 [Zea mays]
gene-LOC100191389	uncharacterized protein LOC100191389 [Zea mays]
gene-LOC100191390	exoglucanase 1 isoform X1 [Zea mays]
gene-LOC100191392	Exocyst complex component EXO84B [Zea mays]
gene-LOC100191393	uncharacterized protein LOC100191393 [Zea mays]
gene-LOC100191394	uncharacterized LOC100191394 [Zea mays]
gene-LOC100191395	uncharacterized protein LOC100191395 isoform X1 [Zea mays]
gene-LOC100191396	putative RING/U-box superfamily protein [Zea mays]
gene-LOC100191397	uncharacterized protein LOC100191397 isoform X1 [Zea mays]
gene-LOC100191398	uncharacterized protein LOC100191398 [Zea mays]
gene-LOC100191399	PHD finger protein rhinoceros [Setaria italica]
gene-LOC100191400	uncharacterized LOC100191400 precursor [Zea mays]
gene-LOC100191401	uncharacterized protein LOC100191401 [Zea mays]
gene-LOC100191402	nucleotide-sugar transporter/ sugar porter [Zea mays]
gene-LOC100191403	uncharacterized protein LOC100191403 [Zea mays]
gene-LOC100191404	Exocyst complex component EXO70A1 [Zea mays]
gene-LOC100191405	uncharacterized protein LOC100191405 [Zea mays]
gene-LOC100191406	unknown [Zea mays]
gene-LOC100191407	uncharacterized protein LOC100191407 [Zea mays]
gene-LOC100191408	uncharacterized LOC100191408 [Zea mays]
gene-LOC100191409	putative phototropic-resoponsive NPH3 family protein [Zea mays]
gene-LOC100191410	DNA-directed RNA polymerase II protein isoform X1 [Zea mays]
gene-LOC100191411	chaperone DNA J2 [Zea mays]
gene-LOC100191412	uncharacterized protein LOC100191412 isoform X1 [Zea mays]
gene-LOC100191413	uncharacterized protein LOC100191413 [Zea mays]
gene-LOC100191414	uncharacterized protein LOC100191414 [Zea mays]
gene-LOC100191415	uncharacterized protein LOC100191415 [Zea mays]
gene-LOC100191416	uncharacterized protein LOC100191416 [Zea mays]
gene-LOC100191417	uncharacterized protein LOC100191417 [Zea mays]
gene-LOC100191418	putative O-Glycosyl hydrolase superfamily protein precursor [Zea mays]
gene-LOC100191419	uncharacterized protein LOC100191419 [Zea mays]
gene-LOC100191420	uncharacterized protein LOC100191420 precursor [Zea mays]
gene-LOC100191422	uncharacterized protein LOC100191422 [Zea mays]
gene-LOC100191423	uncharacterized protein LOC100191423 [Zea mays]
gene-LOC100191424	uncharacterized protein LOC100191424 [Zea mays]
gene-LOC100191425	uncharacterized protein LOC100191425 isoform X1 [Zea mays]
gene-LOC100191426	uncharacterized protein LOC100191426 [Zea mays]
gene-LOC100191427	uncharacterized protein LOC100191427 isoform X1 [Zea mays]
gene-LOC100191428	Putative RING zinc finger and VWF domain family protein [Zea mays]
gene-LOC100191429	putative MAP kinase family protein [Zea mays]
gene-LOC100191430	uncharacterized protein LOC100191430 precursor [Zea mays]
gene-LOC100191431	alpha/beta-Hydrolases superfamily protein isoform X1 [Zea mays]
gene-LOC100191432	uncharacterized protein LOC100191432 isoform X1 [Zea mays]
gene-LOC100191433	uncharacterized LOC100191433 isoform X1 [Zea mays]
gene-LOC100191434	uncharacterized protein LOC100191434 [Zea mays]
gene-LOC100191435	uncharacterized protein LOC100191435 [Zea mays]
gene-LOC100191436	uncharacterized protein LOC100191436 [Zea mays]
gene-LOC100191437	uncharacterized protein LOC100191437 isoform X1 [Zea mays]
gene-LOC100191438	putative WAK family receptor-like protein kinase isoform X1 [Zea mays]
gene-LOC100191439	Wall-associated receptor kinase-like protein 9 [Zea mays]
gene-LOC100191440	DNAJ heat shock N-terminal domain-containing protein [Zea mays]
gene-LOC100191441	uncharacterized protein LOC100191441 isoform X1 [Zea mays]
gene-LOC100191442	uncharacterized protein LOC100191442 [Zea mays]
gene-LOC100191443	uncharacterized protein LOC100191443 [Zea mays]
gene-LOC100191444	uncharacterized protein LOC100191444 precursor [Zea mays]
gene-LOC100191445	putative ornithine aminotransferase protein [Zea mays]
gene-LOC100191446	putative protein kinase superfamily protein [Zea mays]
gene-LOC100191447	uncharacterized LOC100191447 [Zea mays]
gene-LOC100191448	uncharacterized LOC100191448 [Zea mays]
gene-LOC100191449	chloroplast purple acid phosphatase isoform X1 [Zea mays]
gene-LOC100191450	uncharacterized protein LOC100191450 [Zea mays]
gene-LOC100191451	uncharacterized protein LOC100191451 [Zea mays]
gene-LOC100191452	uncharacterized LOC100191452 [Zea mays]
gene-LOC100191453	NADH-ubiquinone oxidoreductase subunit [Zea mays]
gene-LOC100191454	uncharacterized LOC100191454 precursor [Zea mays]
gene-LOC100191455	unknown [Zea mays]
gene-LOC100191456	uncharacterized protein LOC100191456 [Zea mays]
gene-LOC100191457	uncharacterized protein LOC100191457 [Zea mays]
gene-LOC100191458	uncharacterized protein LOC100191458 isoform X1 [Zea mays]
gene-LOC100191459	uncharacterized protein LOC100191459 [Zea mays]
gene-LOC100191460	phosphoenolpyruvate carboxylase isoform X1 [Zea mays]
gene-LOC100191461	uncharacterized protein LOC100191461 [Zea mays]
gene-LOC100191462	uncharacterized protein LOC100191462 isoform X1 [Zea mays]
gene-LOC100191463	uncharacterized protein LOC100191463 [Zea mays]
gene-LOC100191464	putative leucine-rich repeat transmembrane protein kinase family protein isoform X1 [Zea mays]
gene-LOC100191465	putative phototropic-resoponsive NPH3 family protein [Zea mays]
gene-LOC100191466	uncharacterized protein LOC100191466 [Zea mays]
gene-LOC100191467	uncharacterized protein LOC100191467 [Zea mays]
gene-LOC100191468	uncharacterized protein LOC100191468 isoform X1 [Zea mays]
gene-LOC100191469	Acyl-coenzyme A oxidase [Zea mays]
gene-LOC100191470	uncharacterized protein LOC100191470 [Zea mays]
gene-LOC100191471	putative O-Glycosyl hydrolase superfamily protein precursor [Zea mays]
gene-LOC100191472	Pentatricopeptide repeat-containing protein mitochondrial [Zea mays]
gene-LOC100191473	uncharacterized protein LOC100191473 precursor [Zea mays]
gene-LOC100191474	DNA topoisomerase 1 beta [Zea mays]
gene-LOC100191475	uncharacterized protein LOC100191475 isoform X1 [Zea mays]
gene-LOC100191476	uncharacterized protein LOC100191476 [Zea mays]
gene-LOC100191477	Peroxisome biogenesis protein 5 [Zea mays]
gene-LOC100191478	uncharacterized protein LOC100191478 [Zea mays]
gene-LOC100191479	putative Transmembrane 9 family protein member 2 precursor [Zea mays]
gene-LOC100191480	Myosin-binding protein 7 [Zea mays]
gene-LOC100191481	uncharacterized protein LOC100191481 [Zea mays]
gene-LOC100191482	zinc finger BED domain-containing protein RICESLEEPER 1 [Zea mays]
gene-LOC100191483	pentatricopeptide repeat-containing protein ATP4, chloroplastic [Zea mays]
gene-LOC100191484	putative leucine-rich repeat receptor-like protein kinase family protein precursor [Zea mays]
gene-LOC100191485	putative RING zinc finger and ankyrin repeat containing protein [Zea mays]
gene-LOC100191486	exocyst complex component EXO70B1 [Zea mays]
gene-LOC100191487	uncharacterized protein LOC100191487 [Zea mays]
gene-LOC100191488	Prolyl endopeptidase [Zea mays]
gene-LOC100191489	uncharacterized protein LOC100191489 [Zea mays]
gene-LOC100191490	uncharacterized protein LOC100191490 [Zea mays]
gene-LOC100191491	uncharacterized protein LOC100191491 isoform X1 [Zea mays]
gene-LOC100191492	putative leucine-rich repeat transmembrane protein kinase family protein isoform X1 [Zea mays]
gene-LOC100191493	putative lectin-domain receptor-like protein kinase family protein [Zea mays]
gene-LOC100191494	oligopeptide transporter 9 [Zea mays]
gene-LOC100191495	uncharacterized protein LOC100191495 isoform X1 [Zea mays]
gene-LOC100191496	uncharacterized protein LOC100191496 isoform X1 [Zea mays]
gene-LOC100191497	uncharacterized protein LOC100191497 [Zea mays]
gene-LOC100191498	Putative MAP kinase family protein [Zea mays]
gene-LOC100191499	uncharacterized protein LOC100191499 [Zea mays]
gene-LOC100191500	uncharacterized protein LOC100191500 [Zea mays]
gene-LOC100191501	type II intron maturase family protein [Zea mays]
gene-LOC100191502	uncharacterized protein LOC100191502 isoform X1 [Zea mays]
gene-LOC100191503	putative chloride channel-like protein CLC-g [Zea mays]
gene-LOC100191504	uncharacterized protein LOC100191504 [Zea mays]
gene-LOC100191505	Rop guanine nucleotide exchange factor 14 [Zea mays]
gene-LOC100191506	uncharacterized protein LOC100191506 [Zea mays]
gene-LOC100191507	putative RAN GTPase activating family protein isoform X1 [Zea mays]
gene-LOC100191508	uncharacterized protein LOC100191508 isoform X1 [Zea mays]
gene-LOC100191509	uncharacterized protein LOC100191509 isoform X1 [Zea mays]
gene-LOC100191510	uncharacterized protein LOC100191510 isoform X1 [Zea mays]
gene-LOC100191511	uncharacterized protein LOC100191511 [Zea mays]
gene-LOC100191512	acyltransferase [Zea mays]
gene-LOC100191513	uncharacterized protein LOC100191513 [Zea mays]
gene-LOC100191514	cupin, RmlC-type isoform X1 [Zea mays]
gene-LOC100191515	uncharacterized LOC100191515 [Zea mays]
gene-LOC100191516	uncharacterized protein LOC100191516 [Zea mays]
gene-LOC100191517	uncharacterized LOC100191517 isoform X1 [Zea mays]
gene-LOC100191518	putative DEAD-box ATP-dependent RNA helicase family protein [Zea mays]
gene-LOC100191519	uncharacterized protein LOC100191519 [Zea mays]
gene-LOC100191520	uncharacterized protein LOC100191520 [Zea mays]
gene-LOC100191521	uncharacterized protein LOC100191521 [Zea mays]
gene-LOC100191522	uncharacterized LOC100191522 [Zea mays]
gene-LOC100191523	uncharacterized protein LOC100191523 isoform X1 [Zea mays]
gene-LOC100191524	uncharacterized protein LOC100191524 [Zea mays]
gene-LOC100191526	putative oxidoreductase, aldo/keto reductase family protein isoform X1 [Zea mays]
gene-LOC100191527	uncharacterized protein LOC100191527 [Zea mays]
gene-LOC100191528	uncharacterized protein LOC100191528 [Zea mays]
gene-LOC100191529	uncharacterized protein LOC100191529 [Zea mays]
gene-LOC100191530	uncharacterized protein LOC100191530 [Zea mays]
gene-LOC100191531	putative bifunctional inhibitor/LTP/seed storage protein family precursor [Zea mays]
gene-LOC100191532	serine hydroxymethyltransferase [Zea mays]
gene-LOC100191533	putative MYB DNA-binding domain superfamily protein isoform X1 [Zea mays]
gene-LOC100191534	nucleic acid binding protein [Zea mays]
gene-LOC100191535	uncharacterized protein LOC100191535 [Zea mays]
gene-LOC100191536	uncharacterized protein LOC100191536 [Zea mays]
gene-LOC100191537	uncharacterized protein LOC100191537 precursor [Zea mays]
gene-LOC100191538	hypothetical protein [Zea mays]
gene-LOC100191539	putative cytochrome P450 superfamily protein [Zea mays]
gene-LOC100191540	uncharacterized protein LOC100191540 [Zea mays]
gene-LOC100191541	putative metacaspase family protein isoform X1 [Zea mays]
gene-LOC100191542	uncharacterized protein LOC100191542 precursor [Zea mays]
gene-LOC100191543	uncharacterized protein LOC100191543 isoform X4 [Zea mays]
gene-LOC100191544	ferredoxin-thioredoxin reductase, variable chain, chloroplastic [Zea mays]
gene-LOC100191545	uncharacterized protein LOC100191545 isoform X1 [Zea mays]
gene-LOC100191546	putative Secondary cell wall glycosyltransferase family 47 precursor [Zea mays]
gene-LOC100191547	uncharacterized protein LOC100191547 [Zea mays]
gene-LOC100191548	glutamyl-tRNA reductase-like protein [Zea mays]
gene-LOC100191549	uncharacterized LOC100191549 [Zea mays]
gene-LOC100191550	uncharacterized protein LOC100191550 [Zea mays]
gene-LOC100191551	uncharacterized protein LOC100191551 [Zea mays]
gene-LOC100191552	class I heat shock protein 3 [Zea mays]
gene-LOC100191553	uncharacterized protein LOC100191553 isoform X1 [Zea mays]
gene-LOC100191554	uncharacterized protein LOC100191554 [Zea mays]
gene-LOC100191555	uncharacterized protein LOC100191555 [Zea mays]
gene-LOC100191556	putative NAC domain transcription factor superfamily protein isoform X1 [Zea mays]
gene-LOC100191557	uncharacterized protein LOC100191557 [Zea mays]
gene-LOC100191559	uncharacterized LOC100191559 [Zea mays]
gene-LOC100191560	ftsH6-Zea mays FtsH protease [Zea mays]
gene-LOC100191561	actin-97 isoform X2 [Zea mays]
gene-LOC100191562	putative cytochrome P450 superfamily protein isoform X1 [Zea mays]
gene-LOC100191563	uncharacterized protein LOC100191563 [Zea mays]
gene-LOC100191564	uncharacterized protein LOC100191564 precursor [Zea mays]
gene-LOC100191565	8-amino-7-oxononanoate synthase [Zea mays]
gene-LOC100191566	uncharacterized protein LOC100191566 precursor [Zea mays]
gene-LOC100191567	putative DUF231 domain containing family protein [Zea mays]
gene-LOC100191568	uncharacterized protein LOC100191568 isoform X1 [Zea mays]
gene-LOC100191569	uncharacterized protein LOC100191569 [Zea mays]
gene-LOC100191570	putative galacturonosyltransferase-like 9 precursor [Zea mays]
gene-LOC100191571	uncharacterized LOC100191571 isoform 1 [Zea mays]
gene-LOC100191573	uncharacterized protein LOC100191573 isoform 1 [Zea mays]
gene-LOC100191574	tyrosine specific protein phosphatase family protein [Zea mays]
gene-LOC100191575	uncharacterized protein LOC100191575 [Zea mays]
gene-LOC100191576	Seed maturation protein [Zea mays]
gene-LOC100191577	4/1 protein [Zea mays]
gene-LOC100191578	calcineurin B-like protein [Zea mays]
gene-LOC100191579	uncharacterized protein LOC100191579 [Zea mays]
gene-LOC100191580	uncharacterized protein LOC100191580 [Zea mays]
gene-LOC100191581	IAA17-auxin-responsive Aux/IAA family member [Zea mays]
gene-LOC100191582	uncharacterized protein LOC100191582 [Zea mays]
gene-LOC100191584	xyloglucan endotransglucosylase/hydrolase protein 23 precursor [Zea mays]
gene-LOC100191586	uncharacterized protein LOC100191586 isoform X1 [Zea mays]
gene-LOC100191587	uncharacterized protein LOC100191587 isoform X1 [Zea mays]
gene-LOC100191588	uncharacterized protein LOC100191588 precursor [Zea mays]
gene-LOC100191589	putative HLH DNA-binding domain superfamily protein isoform X1 [Zea mays]
gene-LOC100191590	uncharacterized protein LOC100191590 [Zea mays]
gene-LOC100191591	uncharacterized protein LOC100191591 [Zea mays]
gene-LOC100191592	unknown [Zea mays]
gene-LOC100191593	uncharacterized protein LOC100191593 precursor [Zea mays]
gene-LOC100191594	18S pre-ribosomal assembly protein gar2-related [Zea mays]
gene-LOC100191595	uncharacterized protein LOC100191595 isoform X1 [Zea mays]
gene-LOC100191596	tetracycline transporter protein [Zea mays]
gene-LOC100191598	class II heat shock protein [Zea mays]
gene-LOC100191599	uncharacterized protein LOC100191599 [Zea mays]
gene-LOC100191600	Outer arm dynein light chain 1 protein [Zea mays]
gene-LOC100191601	Squalene synthase 1 [Zea mays]
gene-LOC100191602	cysteine protease 1 [Zea mays]
gene-LOC100191603	unknown [Zea mays]
gene-LOC100191604	uncharacterized LOC100191604 isoform X1 [Zea mays]
gene-LOC100191605	uncharacterized protein LOC100191605 [Zea mays]
gene-LOC100191606	putative ARF GTPase-activating domain family protein [Zea mays]
gene-LOC100191607	unknown [Zea mays]
gene-LOC100191608	uncharacterized protein LOC100191608 [Zea mays]
gene-LOC100191609	uncharacterized protein LOC100191609 [Zea mays]
gene-LOC100191610	uncharacterized protein LOC100191610 [Zea mays]
gene-LOC100191611	uncharacterized protein LOC100191611 [Zea mays]
gene-LOC100191612	uncharacterized protein LOC100191612 [Zea mays]
gene-LOC100191613	putative DUF726-domain family protein [Zea mays]
gene-LOC100191614	pyruvate kinase [Zea mays]
gene-LOC100191615	uncharacterized protein LOC100191615 [Zea mays]
gene-LOC100191616	uncharacterized protein LOC100191616 [Zea mays]
gene-LOC100191617	hydroquinone glucosyltransferase [Zea mays]
gene-LOC100191618	speckle-type POZ protein [Zea mays]
gene-LOC100191619	alpha/beta-Hydrolases superfamily protein [Zea mays]
gene-LOC100191620	uncharacterized LOC100191620 precursor [Zea mays]
gene-LOC100191621	uncharacterized protein LOC100191621 [Zea mays]
gene-LOC100191622	uncharacterized protein LOC100191622 [Zea mays]
gene-LOC100191623	uncharacterized protein LOC100191623 precursor [Zea mays]
gene-LOC100191624	uncharacterized protein LOC100191624 [Zea mays]
gene-LOC100191625	uncharacterized LOC100191625 isoform X1 [Zea mays]
gene-LOC100191626	uncharacterized protein LOC100191626 [Zea mays]
gene-LOC100191627	uncharacterized LOC100191627 [Zea mays]
gene-LOC100191628	uncharacterized protein LOC100191628 [Zea mays]
gene-LOC100191629	methionine aminopeptidase isoform X1 [Zea mays]
gene-LOC100191630	putative WRKY DNA-binding domain superfamily protein [Zea mays]
gene-LOC100191631	beta-galactosidase precursor [Zea mays]
gene-LOC100191632	lipid binding protein [Zea mays]
gene-LOC100191633	hypothetical protein [Zea mays]
gene-LOC100191634	uncharacterized protein LOC100191634 [Zea mays]
gene-LOC100191635	uncharacterized protein LOC100191635 [Zea mays]
gene-LOC100191636	ATG8-interacting protein 1 [Zea mays]
gene-LOC100191637	uncharacterized protein LOC100191637 [Zea mays]
gene-LOC100191638	salt tolerance protein [Zea mays]
gene-LOC100191639	integral membrane protein [Zea mays]
gene-LOC100191640	putative RING zinc finger domain superfamily protein [Zea mays]
gene-LOC100191641	uncharacterized LOC100856892 [Zea mays]
gene-LOC100191642	uncharacterized LOC100191642 [Zea mays]
gene-LOC100191643	Retrovirus-related Pol polyprotein LINE-1 [Zea mays]
gene-LOC100191644	uncharacterized protein LOC100191644 [Zea mays]
gene-LOC100191645	uncharacterized protein LOC100191645 [Zea mays]
gene-LOC100191647	speckle-type POZ protein [Zea mays]
gene-LOC100191648	Transducin/WD40 repeat-like superfamily protein [Zea mays]
gene-LOC100191649	uncharacterized protein LOC100191649 [Zea mays]
gene-LOC100191650	vesicle-associated membrane protein 721 [Sorghum bicolor]
gene-LOC100191652	uncharacterized protein LOC100191652 isoform X1 [Zea mays]
gene-LOC100191653	protein phosphatase 2C [Zea mays]
gene-LOC100191654	uncharacterized protein LOC100191654 [Zea mays]
gene-LOC100191655	uncharacterized protein LOC100191655 [Zea mays]
gene-LOC100191656	uncharacterized protein LOC100191656 [Zea mays]
gene-LOC100191657	Isocitrate dehydrogenase [Zea mays]
gene-LOC100191658	unknown [Zea mays]
gene-LOC100191659	uncharacterized protein LOC100191659 [Zea mays]
gene-LOC100191660	uncharacterized LOC100191660 isoform 1 [Zea mays]
gene-LOC100191661	uncharacterized protein LOC100191661 precursor [Zea mays]
gene-LOC100191662	uncharacterized protein LOC100191662 [Zea mays]
gene-LOC100191663	RNA-binding (RRM/RBD/RNP motifs) family protein [Zea mays]
gene-LOC100191664	uncharacterized protein LOC100191664 [Zea mays]
gene-LOC100191665	Importin subunit alpha-2 [Zea mays]
gene-LOC100191666	uncharacterized protein LOC100191666 [Zea mays]
gene-LOC100191667	uncharacterized protein LOC100191667 isoform X1 [Zea mays]
gene-LOC100191668	uncharacterized LOC100191668 [Zea mays]
gene-LOC100191669	pollen-specific kinase partner protein isoform X1 [Zea mays]
gene-LOC100191670	uncharacterized protein LOC100191670 precursor [Zea mays]
gene-LOC100191671	uncharacterized protein LOC100191671 [Zea mays]
gene-LOC100191672	uncharacterized protein LOC100191672 [Zea mays]
gene-LOC100191673	signal recognition particle receptor homolog 1 [Zea mays]
gene-LOC100191674	uncharacterized protein LOC100191674 isoform X1 [Zea mays]
gene-LOC100191675	putative cytochrome P450 superfamily protein precursor [Zea mays]
gene-LOC100191676	uncharacterized protein LOC100191676 [Zea mays]
gene-LOC100191677	DNA binding protein [Zea mays]
gene-LOC100191678	uncharacterized protein LOC100191678 [Zea mays]
gene-LOC100191679	type II CPD DNA photolyase [Zea mays]
gene-LOC100191680	uncharacterized protein LOC100191680 isoform X1 [Zea mays]
gene-LOC100191681	uncharacterized LOC100216796 [Zea mays]
gene-LOC100191682	hemolysin-III family protein [Zea mays]
gene-LOC100191683	uncharacterized protein LOC100191683 [Zea mays]
gene-LOC100191684	Oxygen-evolving enhancer protein 1-1 chloroplastic [Zea mays]
gene-LOC100191685	putative bZIP transcription factor superfamily protein [Zea mays]
gene-LOC100191686	Haloacid dehalogenase-like hydrolase domain-containing protein Sgpp [Zea mays]
gene-LOC100191687	putative MATE efflux family protein [Zea mays]
gene-LOC100191688	putative RING zinc finger domain superfamily protein [Zea mays]
gene-LOC100191689	uncharacterized protein LOC100191689 [Zea mays]
gene-LOC100191690	putative protein kinase superfamily protein [Zea mays]
gene-LOC100191691	uncharacterized protein LOC100191691 [Zea mays]
gene-LOC100191692	uncharacterized protein LOC100191692 [Zea mays]
gene-LOC100191693	uncharacterized protein LOC100191693 precursor [Zea mays]
gene-LOC100191694	uncharacterized protein LOC100191694 precursor [Zea mays]
gene-LOC100191695	vesicle transport v-SNARE 13 isoform X1 [Zea mays]
gene-LOC100191697	uncharacterized protein LOC100191697 precursor [Zea mays]
gene-LOC100191698	uncharacterized protein LOC100191698 [Zea mays]
gene-LOC100191699	putative glycosyl hydrolase family 10 protein [Zea mays]
gene-LOC100191700	uncharacterized protein LOC100191700 [Zea mays]
gene-LOC100191701	pectinesterase precursor [Zea mays]
gene-LOC100191702	uncharacterized protein LOC100191702 [Zea mays]
gene-LOC100191704	uncharacterized protein LOC100191704 [Zea mays]
gene-LOC100191705	uncharacterized protein LOC100191705 [Zea mays]
gene-LOC100191706	heat shock protein [Zea mays]
gene-LOC100191707	uncharacterized protein LOC100191707 precursor [Zea mays]
gene-LOC100191708	uncharacterized protein LOC100191708 precursor [Zea mays]
gene-LOC100191709	Protein NRT1/ PTR FAMILY 5.6 [Zea mays]
gene-LOC100191710	uncharacterized protein LOC100191710 isoform X1 [Zea mays]
gene-LOC100191711	unknown [Zea mays]
gene-LOC100191712	Lysophospholipid acyltransferase LPEAT2 [Zea mays]
gene-LOC100191713	hypothetical protein [Zea mays]
gene-LOC100191714	uncharacterized LOC100191714 [Zea mays]
gene-LOC100191715	chlorophyll a-b binding protein [Zea mays]
gene-LOC100191716	putative NAC domain transcription factor superfamily protein [Zea mays]
gene-LOC100191717	uncharacterized protein LOC100191717 isoform X1 [Zea mays]
gene-LOC100191718	uncharacterized protein LOC100191718 [Zea mays]
gene-LOC100191719	putative RING/U-box superfamily protein [Zea mays]
gene-LOC100191720	uncharacterized protein LOC100191720 [Zea mays]
gene-LOC100191721	liguleless narrow1 [Zea mays]
gene-LOC100191722	uncharacterized protein LOC100191722 [Zea mays]
gene-LOC100191723	uncharacterized protein LOC100191723 [Zea mays]
gene-LOC100191724	uncharacterized protein LOC100191724 [Zea mays]
gene-LOC100191725	uncharacterized protein LOC100191725 [Zea mays]
gene-LOC100191726	uncharacterized protein LOC100191726 [Zea mays]
gene-LOC100191727	putative DEAD-box ATP-dependent RNA helicase family protein [Zea mays]
gene-LOC100191728	RecName: Full=DELLA protein DWARF8; Short=Protein dwarf-8 CAB51557.1 gibberellin response modulator, partial [Zea mays]
gene-LOC100191729	cadmium/zinc-transporting ATPase HMA2 isoform X1 [Zea mays]
gene-LOC100191730	uncharacterized protein LOC100191730 isoform X1 [Zea mays]
gene-LOC100191731	MYBGA transcription factor [Zea mays]
gene-LOC100191733	zinc finger protein hangover [Zea mays]
gene-LOC100191734	uncharacterized protein LOC100191734 precursor [Zea mays]
gene-LOC100191735	Zinc finger BED domain-containing protein DAYSLEEPER [Zea mays]
gene-LOC100191736	uncharacterized protein LOC100272254 [Zea mays]
gene-LOC100191737	uncharacterized protein LOC100191737 isoform X1 [Zea mays]
gene-LOC100191738	g14A [Zea mays]
gene-LOC100191739	uncharacterized protein LOC100191739 [Zea mays]
gene-LOC100191740	unknown [Zea mays]
gene-LOC100191741	uncharacterized protein LOC100191741 isoform X1 [Zea mays]
gene-LOC100191742	uncharacterized protein LOC100191742 [Zea mays]
gene-LOC100191743	uncharacterized protein LOC100191743 [Zea mays]
gene-LOC100191746	putative leucine-rich repeat protein kinase family protein precursor [Zea mays]
gene-LOC100191747	uncharacterized protein LOC100191747 [Zea mays]
gene-LOC100191748	uncharacterized protein LOC100191748 precursor [Zea mays]
gene-LOC100191749	male sterile26 [Zea mays]
gene-LOC100191750	transferase [Zea mays]
gene-LOC100191751	uncharacterized protein LOC100191751 isoform X1 [Zea mays]
gene-LOC100191752	uncharacterized protein LOC100191752 [Zea mays]
gene-LOC100191753	putative O-glycosyl hydrolase family 17 protein precursor [Zea mays]
gene-LOC100191754	uncharacterized protein LOC100191754 [Zea mays]
gene-LOC100191755	uncharacterized protein LOC100191755 [Zea mays]
gene-LOC100191756	putative Solute carrier family 35 member C2 [Zea mays]
gene-LOC100191757	uncharacterized protein LOC100191757 [Zea mays]
gene-LOC100191759	putative inactive purple acid phosphatase 27 [Zea mays]
gene-LOC100191760	Homeodomain-like superfamily protein [Zea mays]
gene-LOC100191761	DEAD-box ATP-dependent RNA helicase 3B, chloroplastic [Zea mays]
gene-LOC100191763	AP-3 complex subunit sigma-2 isoform X1 [Zea mays]
gene-LOC100191764	uncharacterized protein LOC100191764 precursor [Zea mays]
gene-LOC100191765	glyoxylate reductase isoform X1 [Zea mays]
gene-LOC100191766	uncharacterized protein LOC100191766 isoform X1 [Zea mays]
gene-LOC100191767	nucleic acid binding protein [Zea mays]
gene-LOC100191769	uncharacterized protein LOC100191769 precursor [Zea mays]
gene-LOC100191770	uncharacterized LOC100191770 [Zea mays]
gene-LOC100191771	uncharacterized protein LOC100191771 precursor [Zea mays]
gene-LOC100191772	riboflavin biosynthesis protein PYRD, chloroplastic isoform X1 [Zea mays]
gene-LOC100191773	uncharacterized protein LOC100191773 [Zea mays]
gene-LOC100191776	uncharacterized protein LOC100191776 [Zea mays]
gene-LOC100191777	putative RNA-binding zinc finger family protein [Zea mays]
gene-LOC100191778	protein-tyrosine-phosphatase IBR5-like precursor [Zea mays]
gene-LOC100191779	Laccase-7 [Zea mays]
gene-LOC100191780	uncharacterized protein LOC100191780 [Zea mays]
gene-LOC100191781	uncharacterized protein LOC100191781 precursor [Zea mays]
gene-LOC100191782	putative MYB DNA-binding domain superfamily protein [Zea mays]
gene-LOC100191783	carbohydrate transporter/ sugar porter/ transporter isoform X1 [Zea mays]
gene-LOC100191784	unknown [Zea mays]
gene-LOC100191786	putative bZIP transcription factor superfamily protein isoform X1 [Zea mays]
gene-LOC100191787	putative auxin efflux carrier PIN9 [Zea mays]
gene-LOC100191788	protein-protein interaction regulator family protein [Zea mays]
gene-LOC100191789	uncharacterized protein LOC100191789 [Zea mays]
gene-LOC100191790	uncharacterized protein LOC100191790 [Zea mays]
gene-LOC100191791	uncharacterized protein LOC100191791 [Zea mays]
gene-LOC100191792	uncharacterized protein LOC100191792 [Zea mays]
gene-LOC100191793	uncharacterized LOC100191793 isoform X1 [Zea mays]
gene-LOC100191794	uncharacterized protein LOC100191794 precursor [Zea mays]
gene-LOC100191795	mitogen-activated protein kinase kinase kinase 3 [Zea mays]
gene-LOC100191796	uncharacterized protein LOC100191796 isoform X1 [Zea mays]
gene-LOC100191797	uncharacterized protein LOC100191797 [Zea mays]
gene-LOC100191798	putative pre-mRNA-splicing factor ATP-dependent RNA helicase DEAH3 isoform X1 [Zea mays]
gene-LOC100191799	uncharacterized protein LOC100191799 [Zea mays]
gene-LOC100191802	dolichyl-diphosphooligosaccharide--protein glycosyltransferase 48 kDasubunit isoform X1 [Zea mays]
gene-LOC100191804	EF hand family protein [Zea mays]
gene-LOC100191806	uncharacterized protein LOC100191806 isoform X1 [Zea mays]
gene-LOC100191807	glycerol-3-phosphate dehydrogenase [Zea mays]
gene-LOC100191808	uncharacterized LOC100191808 isoform 1 [Zea mays]
gene-LOC100191809	putative RING zinc finger domain superfamily protein [Zea mays]
gene-LOC100191810	uncharacterized protein LOC100191810 [Zea mays]
gene-LOC100191811	uncharacterized protein LOC100191811 [Zea mays]
gene-LOC100191812	uncharacterized LOC100191812 [Zea mays]
gene-LOC100191813	uncharacterized protein LOC100191813 [Zea mays]
gene-LOC100191814	uncharacterized protein LOC100191814 [Zea mays]
gene-LOC100191815	uncharacterized protein LOC100191815 [Zea mays]
gene-LOC100191816	uncharacterized protein LOC100191816 isoform X1 [Zea mays]
gene-LOC100191817	uncharacterized protein LOC100191817 [Zea mays]
gene-LOC100191818	unknown [Zea mays]
gene-LOC100191819	4-methyl-5-thiazole monophosphate biosynthesis protein [Zea mays]
gene-LOC100191820	uncharacterized LOC100191820 [Zea mays]
gene-LOC100191821	uncharacterized protein LOC100191821 [Zea mays]
gene-LOC100191822	RNA-binding protein Luc7-like 2 [Zea mays]
gene-LOC100191823	uncharacterized protein LOC100191823 isoform X1 [Zea mays]
gene-LOC100191824	blue copper protein precursor [Zea mays]
gene-LOC100191825	uncharacterized protein LOC100191825 [Zea mays]
gene-LOC100191826	uncharacterized protein LOC100191826 [Zea mays]
gene-LOC100191827	uncharacterized protein LOC100191827 [Zea mays]
gene-LOC100191828	CBS domain containing protein [Zea mays]
gene-LOC100191829	uncharacterized protein LOC100191829 [Zea mays]
gene-LOC100191830	uncharacterized protein LOC100191830 isoform X1 [Zea mays]
gene-LOC100191831	nicotianamine synthase6 [Zea mays]
gene-LOC100191832	RNA 3-terminal phosphate cyclase-like protein [Zea mays]
gene-LOC100191833	OJ991113_30.19 protein [Zea mays]
gene-LOC100191834	uncharacterized protein LOC100191834 [Zea mays]
gene-LOC100191835	AFG1-like ATPase family protein [Zea mays]
gene-LOC100191836	unknown [Zea mays]
gene-LOC100191837	uncharacterized protein LOC100191837 [Zea mays]
gene-LOC100191838	S-adenosylmethionine synthase [Zea mays]
gene-LOC100191839	uncharacterized LOC100191839 isoform 2 [Zea mays]
gene-LOC100191840	uncharacterized LOC100191840 [Zea mays]
gene-LOC100191841	uncharacterized protein LOC100191841 [Zea mays]
gene-LOC100191842	Triacylglycerol lipase like protein [Zea mays]
gene-LOC100191843	putative DUF231 domain containing family protein [Zea mays]
gene-LOC100191844	uncharacterized protein LOC100191844 precursor [Zea mays]
gene-LOC100191845	uncharacterized protein LOC100191845 precursor [Zea mays]
gene-LOC100191846	uncharacterized protein LOC100191846 [Zea mays]
gene-LOC100191847	uncharacterized protein LOC100191847 [Zea mays]
gene-LOC100191848	Ras protein RIC1 [Zea mays]
gene-LOC100191849	putative AMP-dependent synthetase and ligase superfamily protein [Zea mays]
gene-LOC100191850	uncharacterized protein LOC100191850 isoform X1 [Zea mays]
gene-LOC100191851	unknown [Zea mays]
gene-LOC100191852	uncharacterized protein LOC100191852 isoform X1 [Zea mays]
gene-LOC100191853	uncharacterized protein LOC100191853 [Zea mays]
gene-LOC100191854	uncharacterized protein LOC100191854 [Zea mays]
gene-LOC100191855	uncharacterized protein LOC100191855 [Zea mays]
gene-LOC100191856	chorismate mutase [Zea mays]
gene-LOC100191857	uncharacterized protein LOC100191857 [Zea mays]
gene-LOC100191858	splicing factor U2af 38 kDa subunit [Zea mays]
gene-LOC100191859	uncharacterized protein LOC100191859 [Zea mays]
gene-LOC100191860	uncharacterized protein LOC100191860 [Zea mays]
gene-LOC100191861	uncharacterized LOC100191861 isoform X1 [Zea mays]
gene-LOC100191862	dTDP-glucose dehydratase homolog csu219 [Zea mays]
gene-LOC100191864	uncharacterized protein LOC100191864 [Zea mays]
gene-LOC100191865	putative RING zinc finger domain superfamily protein [Zea mays]
gene-LOC100191866	uncharacterized LOC100191866 isoform X1 [Zea mays]
gene-LOC100191868	unknown [Zea mays]
gene-LOC100191869	uncharacterized LOC100191869 isoform X1 [Zea mays]
gene-LOC100191870	high-affinity potassium transporter [Zea mays]
gene-LOC100191871	unknown [Zea mays]
gene-LOC100191872	uncharacterized LOC100191872 [Zea mays]
gene-LOC100191873	Zinc finger protein ZAT9 [Zea mays]
gene-LOC100191874	uncharacterized protein LOC100191874 [Zea mays]
gene-LOC100191875	solanesyl diphosphate synthase 2 chloroplastic isoform X1 [Zea mays]
gene-LOC100191876	uncharacterized protein LOC100191876 [Zea mays]
gene-LOC100191877	uncharacterized protein LOC100191877 [Zea mays]
gene-LOC100191878	uncharacterized LOC100191878 [Zea mays]
gene-LOC100191879	unknown [Zea mays]
gene-LOC100191880	PX domain containing protein isoform X1 [Zea mays]
gene-LOC100191881	uncharacterized protein LOC100191881 [Zea mays]
gene-LOC100191882	putative jumonji-like transcription factor family protein [Zea mays]
gene-LOC100191885	unknown [Zea mays]
gene-LOC100191886	uncharacterized protein LOC100191886 [Zea mays]
gene-LOC100191887	chlorophyllase-2 [Zea mays]
gene-LOC100191888	2-hydroxyacyl-CoA lyase [Zea mays]
gene-LOC100191889	avr9/Cf-9 rapidly elicited protein 137 [Zea mays]
gene-LOC100191890	uncharacterized protein LOC100191890 isoform X1 [Zea mays]
gene-LOC100191891	RNA-binding (RRM/RBD/RNP motifs) family protein isoform X1 [Zea mays]
gene-LOC100191892	putative subtilase family protein precursor [Zea mays]
gene-LOC100191893	uncharacterized protein LOC100191893 [Zea mays]
gene-LOC100191894	shikimate dehydrogenase 1 isoform X1 [Zea mays]
gene-LOC100191895	uncharacterized protein LOC100191895 precursor [Zea mays]
gene-LOC100191896	uncharacterized protein LOC100191896 precursor [Zea mays]
gene-LOC100191897	uncharacterized protein LOC100191897 [Zea mays]
gene-LOC100191898	kinesin-like protein KIN-5D isoform X1 [Zea mays]
gene-LOC100191900	glyceraldehyde-3-phosphate dehydrogenase, cytosolic [Zea mays]
gene-LOC100191901	putative MATE efflux family protein [Zea mays]
gene-LOC100191902	uncharacterized protein LOC100191902 [Zea mays]
gene-LOC100191903	TUB-transcription factor 2 [Zea mays]
gene-LOC100191905	uncharacterized LOC100191905 isoform X1 [Zea mays]
gene-LOC100191906	palmitoyltransferase ZDHHC9 [Zea mays]
gene-LOC100191907	uncharacterized protein LOC100191907 [Zea mays]
gene-LOC100191908	uncharacterized LOC100191908 [Zea mays]
gene-LOC100191909	putative HLH DNA-binding domain superfamily protein [Zea mays]
gene-LOC100191910	deoxyhypusine synthase 2 isoform X1 [Zea mays]
gene-LOC100191911	uncharacterized protein LOC100191911 [Zea mays]
gene-LOC100191912	unknown [Zea mays]
gene-LOC100191913	putative DUF231 domain containing family protein [Zea mays]
gene-LOC100191914	uncharacterized protein LOC100191914 precursor [Zea mays]
gene-LOC100191915	uncharacterized protein LOC100191915 [Zea mays]
gene-LOC100191916	uncharacterized protein LOC100191916 [Zea mays]
gene-LOC100191917	uncharacterized protein LOC100191917 [Zea mays]
gene-LOC100191918	putative phototropic-resoponsive NPH3 family protein [Zea mays]
gene-LOC100191919	putative AP2/EREBP transcription factor superfamily protein [Zea mays]
gene-LOC100191920	uncharacterized protein LOC100191920 isoform X1 [Zea mays]
gene-LOC100191921	hypothetical protein [Zea mays]
gene-LOC100191922	uncharacterized protein LOC100191922 [Zea mays]
gene-LOC100191923	uncharacterized protein LOC100191923 [Zea mays]
gene-LOC100191924	CASP-like protein 1E1 [Zea mays]
gene-LOC100191925	uncharacterized protein LOC100191925 [Zea mays]
gene-LOC100191926	uncharacterized protein LOC100191926 [Zea mays]
gene-LOC100191927	uncharacterized protein LOC100191927 [Zea mays]
gene-LOC100191928	uncharacterized LOC100191928 isoform X1 [Zea mays]
gene-LOC100191929	uncharacterized protein LOC100191929 precursor [Zea mays]
gene-LOC100191930	uncharacterized protein LOC100191930 [Zea mays]
gene-LOC100191931	SAUR56-auxin-responsive SAUR family member [Zea mays]
gene-LOC100191932	uncharacterized protein LOC100191932 [Zea mays]
gene-LOC100191933	uncharacterized protein LOC100191933 precursor [Zea mays]
gene-LOC100191934	putative histone-arginine methyltransferase 1.4 [Zea mays]
gene-LOC100191935	VIP1 protein [Zea mays]
gene-LOC100191936	SWI/SNF, matrix-associated, actin-dependent regulator of chromatin subfamily B member 1 [Zea mays]
gene-LOC100191937	putative WRKY DNA-binding domain superfamily protein [Zea mays]
gene-LOC100191938	DREPP4 protein [Zea mays]
gene-LOC100191939	uncharacterized protein LOC100191939 isoform X1 [Zea mays]
gene-LOC100191940	uncharacterized protein LOC100191940 isoform X1 [Zea mays]
gene-LOC100191941	uncharacterized protein LOC100191941 [Zea mays]
gene-LOC100191942	uncharacterized protein LOC100191942 isoform X1 [Zea mays]
gene-LOC100191943	uncharacterized protein LOC100191943 [Zea mays]
gene-LOC100191944	hypothetical protein [Zea mays]
gene-LOC100191945	uncharacterized protein LOC100191945 [Zea mays]
gene-LOC100191947	proteasome C9 1 [Zea mays]
gene-LOC100191949	transcription initiation factor TFIID subunit 9B [Zea mays]
gene-LOC100191950	uncharacterized protein LOC100191950 precursor [Zea mays]
gene-LOC100191951	putative protein kinase superfamily protein [Zea mays]
gene-LOC100191952	uncharacterized protein LOC100191952 [Zea mays]
gene-LOC100191953	unknown [Zea mays]
gene-LOC100191954	Tubby-like F-box protein 6 [Zea mays]
gene-LOC100191955	uncharacterized protein LOC100191955 [Zea mays]
gene-LOC100191956	uncharacterized protein LOC100191956 [Zea mays]
gene-LOC100191957	uncharacterized protein LOC100191957 [Zea mays]
gene-LOC100191958	uncharacterized LOC100191958 [Zea mays]
gene-LOC100191959	adenylyltransferase and sulfurtransferase MOCS3-2 isoform X2 [Zea mays]
gene-LOC100191960	uncharacterized protein LOC100191960 [Zea mays]
gene-LOC100191961	uncharacterized protein LOC100191961 [Zea mays]
gene-LOC100191962	uncharacterized protein LOC100191962 isoform X1 [Zea mays]
gene-LOC100191963	uncharacterized LOC100191963 precursor [Zea mays]
gene-LOC100191964	cytokinin-O-glucosyltransferase 1 [Zea mays]
gene-LOC100191965	uncharacterized protein LOC100191965 [Zea mays]
gene-LOC100191966	uncharacterized LOC100191966 isoform 2 [Zea mays]
gene-LOC100191967	amino acid permease [Zea mays]
gene-LOC100191968	harpin-induced protein [Zea mays]
gene-LOC100191969	uncharacterized protein LOC100191969 precursor [Zea mays]
gene-LOC100191970	uncharacterized protein LOC100191970 [Zea mays]
gene-LOC100191972	SnRK2.10 [Zea mays]
gene-LOC100191973	Protein INAPERTURATE POLLEN1 [Zea mays]
gene-LOC100191974	uncharacterized LOC100191974 [Zea mays]
gene-LOC100191975	putative cytochrome P450 superfamily protein isoform X1 [Zea mays]
gene-LOC100191976	uncharacterized protein LOC100191976 precursor [Zea mays]
gene-LOC100191977	argininosuccinate lyase [Zea mays]
gene-LOC100191978	unknown [Zea mays]
gene-LOC100191979	uncharacterized LOC100191979 [Zea mays]
gene-LOC100191980	uncharacterized protein LOC100191980 [Zea mays]
gene-LOC100191981	Protein trichome birefringence-like 16 [Zea mays]
gene-LOC100191982	uncharacterized protein LOC100191982 [Zea mays]
gene-LOC100191983	uncharacterized protein LOC100191983 [Zea mays]
gene-LOC100191984	photosystem I reaction center subunit II [Zea mays]
gene-LOC100191985	uncharacterized protein LOC100191985 [Zea mays]
gene-LOC100191986	unknown [Zea mays]
gene-LOC100191987	histidinol-phosphate aminotransferase [Zea mays]
gene-LOC100191988	root hair specific 17 isoform X1 [Zea mays]
gene-LOC100191989	uncharacterized protein LOC100191989 [Zea mays]
gene-LOC100191990	uncharacterized protein LOC100191990 [Zea mays]
gene-LOC100191991	serine/threonine protein phosphatase regulatory subunit Bbeta isoform isoform X1 [Zea mays]
gene-LOC100191992	uncharacterized protein LOC100191992 [Zea mays]
gene-LOC100191993	zinc finger C-x8-C-x5-C-x3-H type family protein [Zea mays]
gene-LOC100191994	uncharacterized protein LOC100191994 isoform X1 [Zea mays]
gene-LOC100191995	uncharacterized protein LOC100191995 [Zea mays]
gene-LOC100191996	uncharacterized protein LOC100191996 isoform X1 [Zea mays]
gene-LOC100191997	4-coumarate--CoA ligase 1 [Zea mays]
gene-LOC100191998	uncharacterized protein LOC100191998 [Zea mays]
gene-LOC100191999	uncharacterized protein LOC100191999 [Zea mays]
gene-LOC100192000	uncharacterized protein LOC100192000 [Zea mays]
gene-LOC100192001	uncharacterized protein LOC100192001 [Zea mays]
gene-LOC100192002	uncharacterized protein LOC100192002 isoform X1 [Zea mays]
gene-LOC100192003	uncharacterized protein LOC100192003 isoform X1 [Zea mays]
gene-LOC100192004	farnesyl diphosphate synthase2 [Zea mays]
gene-LOC100192005	carbohydrate transporter/ sugar porter/ transporter isoform X1 [Zea mays]
gene-LOC100192006	uncharacterized protein LOC100192006 [Zea mays]
gene-LOC100192007	putative bZIP transcription factor superfamily protein [Zea mays]
gene-LOC100192009	uncharacterized LOC100192009 [Zea mays]
gene-LOC100192010	uncharacterized protein LOC100192010 [Zea mays]
gene-LOC100192011	putative cytochrome P450 superfamily protein isoform X1 [Zea mays]
gene-LOC100192012	uncharacterized protein LOC100192012 [Zea mays]
gene-LOC100192013	uncharacterized protein LOC100192013 [Zea mays]
gene-LOC100192014	protein HOTHEAD precursor [Zea mays]
gene-LOC100192016	uncharacterized protein LOC100192016 precursor [Zea mays]
gene-LOC100192017	uncharacterized protein LOC100192017 [Zea mays]
gene-LOC100192018	hypothetical protein ZEAMMB73_Zm00001d019394 [Zea mays]
gene-LOC100192019	unknown [Zea mays]
gene-LOC100192020	uncharacterized protein LOC100192020 [Zea mays]
gene-LOC100192021	uncharacterized protein LOC100192021 [Zea mays]
gene-LOC100192022	uncharacterized protein LOC100192022 isoform X1 [Zea mays]
gene-LOC100192023	uncharacterized protein LOC100192023 [Zea mays]
gene-LOC100192024	protein transport protein Sec61 subunit gamma [Sorghum bicolor]
gene-LOC100192025	uncharacterized protein LOC100192025 [Zea mays]
gene-LOC100192026	uncharacterized protein LOC100192026 isoform X1 [Zea mays]
gene-LOC100192027	uncharacterized protein LOC100192027 isoform X1 [Zea mays]
gene-LOC100192028	C2H2-type zinc finger family protein [Zea mays]
gene-LOC100192029	putative O-Glycosyl hydrolase superfamily protein precursor [Zea mays]
gene-LOC100192030	uncharacterized protein LOC100192030 [Zea mays]
gene-LOC100192031	uncharacterized protein LOC100192031 isoform X1 [Zea mays]
gene-LOC100192032	Trafficking protein particle complex subunit 1 [Zea mays]
gene-LOC100192035	uncharacterized LOC100192035 [Zea mays]
gene-LOC100192036	uncharacterized protein LOC100192036 [Zea mays]
gene-LOC100192037	Rhomboid-like protein 19 [Zea mays]
gene-LOC100192038	apospory-associated protein [Zea mays]
gene-LOC100192039	putative O-glycosyl hydrolase family 17 protein precursor [Zea mays]
gene-LOC100192041	uncharacterized protein LOC100192041 [Zea mays]
gene-LOC100192042	uncharacterized protein LOC100192042 [Zea mays]
gene-LOC100192043	glutathione S-transferase GSTU6 [Zea mays]
gene-LOC100192044	uncharacterized LOC100192044 [Zea mays]
gene-LOC100192045	uncharacterized protein LOC103629438 isoform X1 [Zea mays]
gene-LOC100192046	exostosin-like protein isoform X1 [Zea mays]
gene-LOC100192048	uncharacterized protein LOC100192048 [Zea mays]
gene-LOC100192049	uncharacterized protein LOC100192049 isoform X1 [Zea mays]
gene-LOC100192050	putative AP2/EREBP transcription factor superfamily protein [Zea mays]
gene-LOC100192051	uncharacterized protein LOC100192051 isoform X2 [Zea mays]
gene-LOC100192052	uncharacterized protein LOC100192052 isoform X1 [Zea mays]
gene-LOC100192054	putative RING zinc finger domain superfamily protein isoform X1 [Zea mays]
gene-LOC100192056	putative oxysterol binding domain family protein [Zea mays]
gene-LOC100192057	uncharacterized LOC100192057 [Zea mays]
gene-LOC100192058	putative RING zinc finger domain superfamily protein [Zea mays]
gene-LOC100192059	catalytic/ hydrolase [Zea mays]
gene-LOC100192060	blue fluorescent 1 isoform X1 [Zea mays]
gene-LOC100192061	uncharacterized protein LOC100192061 isoform X1 [Zea mays]
gene-LOC100192062	B3 domain-containing protein REM16 [Zea mays]
gene-LOC100192064	uncharacterized protein LOC100192064 isoform X1 [Zea mays]
gene-LOC100192065	uncharacterized protein LOC100192065 [Zea mays]
gene-LOC100192067	Ribonucleoprotein like protein [Zea mays]
gene-LOC100192068	uncharacterized LOC100192068 isoform 1 [Zea mays]
gene-LOC100192069	putative WRKY DNA-binding domain superfamily protein [Zea mays]
gene-LOC100192071	E3 ubiquitin-protein ligase RMA1 [Zea mays]
gene-LOC100192072	uncharacterized protein LOC100192072 precursor [Zea mays]
gene-LOC100192073	2C-type protein phosphatase protein isoform X1 [Zea mays]
gene-LOC100192074	PHD finger protein isoform X1 [Zea mays]
gene-LOC100192075	hexokinase1 isoform X1 [Zea mays]
gene-LOC100192076	GTP binding protein [Zea mays]
gene-LOC100192077	putative RING zinc finger domain superfamily protein [Zea mays]
gene-LOC100192078	uncharacterized protein LOC100192078 isoform X1 [Zea mays]
gene-LOC100192079	uncharacterized protein LOC100192079 [Zea mays]
gene-LOC100192080	uncharacterized LOC100192080 precursor [Zea mays]
gene-LOC100192081	harpin-induced 1 [Zea mays]
gene-LOC100192083	uncharacterized protein LOC100192083 [Zea mays]
gene-LOC100192084	hypothetical protein [Zea mays]
gene-LOC100192085	ACR4 [Zea mays]
gene-LOC100192086	uncharacterized protein LOC100192086 [Zea mays]
gene-LOC100192088	sec12-like protein 2 [Zea mays]
gene-LOC100192089	uncharacterized protein LOC100192089 isoform X1 [Zea mays]
gene-LOC100192090	putative thaumatin domain family protein [Zea mays]
gene-LOC100192091	zinc finger C-x8-C-x5-C-x3-H type family protein isoform X1 [Zea mays]
gene-LOC100192093	nodulin-like protein [Zea mays]
gene-LOC100192094	lipase precursor [Zea mays]
gene-LOC100192095	uncharacterized protein LOC100192095 precursor [Zea mays]
gene-LOC100192096	uncharacterized protein LOC100192096 precursor [Zea mays]
gene-LOC100192097	Protein WVD2-like 5 [Zea mays]
gene-LOC100192098	uncharacterized protein LOC100192098 isoform X1 [Zea mays]
gene-LOC100192099	uncharacterized protein LOC100192099 [Zea mays]
gene-LOC100192100	protein STRUBBELIG-RECEPTOR FAMILY 1 isoform X3 [Zea mays]
gene-LOC100192101	uncharacterized LOC100192101 isoform X1 [Zea mays]
gene-LOC100192102	GDP-mannose 35-epimerase [Zea mays]
gene-LOC100192103	protein-tyrosine sulfotransferase isoform X1 [Zea mays]
gene-LOC100192104	uncharacterized protein LOC100192104 [Zea mays]
gene-LOC100192105	uncharacterized protein LOC100192105 precursor [Zea mays]
gene-LOC100192106	uncharacterized protein LOC100192106 [Zea mays]
gene-LOC100192107	DUF1692 domain, endoplasmic reticulum vescicle transporter protein isoform X1 [Zea mays]
gene-LOC100192108	uncharacterized protein LOC100192108 isoform X1 [Zea mays]
gene-LOC100192109	uncharacterized protein LOC100192109 isoform X1 [Zea mays]
gene-LOC100192110	uncharacterized protein LOC100192110 precursor [Zea mays]
gene-LOC100192111	uncharacterized protein LOC100192111 isoform X1 [Zea mays]
gene-LOC100192112	uncharacterized protein LOC100192112 [Zea mays]
gene-LOC100192113	photolyase/blue-light receptor PHR2 [Zea mays]
gene-LOC100192114	uncharacterized protein LOC100192114 precursor [Zea mays]
gene-LOC100192115	Ycf20-like protein [Zea mays]
gene-LOC100192116	putative bifunctional inhibitor/LTP/seed storage protein family precursor [Zea mays]
gene-LOC100192117	uncharacterized protein LOC100192117 [Zea mays]
gene-LOC100192349	asparagine synthetase 2 [Zea mays]
gene-LOC100192350	asparagine synthetase 3 [Zea mays]
gene-LOC100192351	asparagine synthetase 4 isoform X1 [Zea mays]
gene-LOC100192364	telomere length regulation protein TEL2 homolog [Zea mays]
gene-LOC100192365	putative leucine-rich repeat protein kinase precursor [Zea mays]
gene-LOC100192366	putative leucine-rich repeat receptor-like protein kinase family protein isoform X1 [Zea mays]
gene-LOC100192457	putative AP2/EREBP transcription factor superfamily protein [Zea mays]
gene-LOC100192459	uncharacterized protein LOC100192459 isoform X1 [Zea mays]
gene-LOC100192460	transferase [Zea mays]
gene-LOC100192461	glycine1 [Zea mays]
gene-LOC100192462	uncharacterized protein LOC100192462 precursor [Zea mays]
gene-LOC100192463	uncharacterized protein LOC100192463 [Zea mays]
gene-LOC100192464	uncharacterized protein LOC100192464 [Zea mays]
gene-LOC100192465	uncharacterized protein LOC100192465 [Zea mays]
gene-LOC100192466	uncharacterized LOC100192466 isoform X1 [Zea mays]
gene-LOC100192467	uncharacterized protein LOC100192467 [Zea mays]
gene-LOC100192468	uncharacterized protein LOC100192468 [Zea mays]
gene-LOC100192469	Protein NRT1/ PTR FAMILY 8.1 [Zea mays]
gene-LOC100192470	uncharacterized protein LOC100192470 precursor [Zea mays]
gene-LOC100192472	uncharacterized protein LOC100192472 [Zea mays]
gene-LOC100192473	uncharacterized protein LOC100192473 [Zea mays]
gene-LOC100192474	uncharacterized protein LOC100192474 [Zea mays]
gene-LOC100192475	import inner membrane translocase subunit TIM50 isoform X1 [Zea mays]
gene-LOC100192476	hypothetical protein PAHAL_G01797 [Panicum hallii]
gene-LOC100192477	Alg9-like mannosyltransferase family [Zea mays]
gene-LOC100192478	uncharacterized LOC100192478 [Zea mays]
gene-LOC100192479	DNA cytosine methyltransferase Zmet 3 isoform X1 [Zea mays]
gene-LOC100192480	uncharacterized LOC100192480 isoform X1 [Zea mays]
gene-LOC100192481	Homeobox-transcription factor 84 [Zea mays]
gene-LOC100192482	Peroxidase 55 [Zea mays]
gene-LOC100192483	uncharacterized protein LOC100192483 [Zea mays]
gene-LOC100192484	uncharacterized protein LOC100192484 [Zea mays]
gene-LOC100192485	uncharacterized protein LOC100192485 [Zea mays]
gene-LOC100192486	uncharacterized protein LOC100192486 [Zea mays]
gene-LOC100192487	Wax synthase isoform 1 [Zea mays]
gene-LOC100192488	uncharacterized protein LOC100192488 [Zea mays]
gene-LOC100192489	putative protein kinase superfamily protein [Zea mays]
gene-LOC100192490	uncharacterized protein LOC100192490 isoform 1 [Zea mays]
gene-LOC100192491	uncharacterized protein LOC100192491 precursor [Zea mays]
gene-LOC100192492	putative casein kinase family protein [Zea mays]
gene-LOC100192493	hypothetical protein [Zea mays]
gene-LOC100192494	uncharacterized protein LOC100192494 isoform X1 [Zea mays]
gene-LOC100192495	uncharacterized protein LOC100192495 [Zea mays]
gene-LOC100192496	putative glycogen synthase kinase family protein [Zea mays]
gene-LOC100192497	SnRK2.2 [Zea mays]
gene-LOC100192498	uncharacterized protein LOC100192498 [Zea mays]
gene-LOC100192499	uncharacterized LOC100192499 [Zea mays]
gene-LOC100192500	retrotransposon protein precursor [Zea mays]
gene-LOC100192501	acetyl-CoA C-acyltransferase-like protein [Zea mays]
gene-LOC100192502	uncharacterized LOC100192502 [Zea mays]
gene-LOC100192503	CAAX prenyl protease 1 [Zea mays]
gene-LOC100192505	uncharacterized protein LOC100192505 [Zea mays]
gene-LOC100192506	Zinc transporter SLC39A7 precursor [Zea mays]
gene-LOC100192507	unknown [Zea mays]
gene-LOC100192508	uncharacterized protein LOC100192508 [Zea mays]
gene-LOC100192509	uncharacterized protein LOC100192509 [Zea mays]
gene-LOC100192510	uncharacterized protein LOC100192510 [Zea mays]
gene-LOC100192511	Syntaxin 32 [Zea mays]
gene-LOC100192513	uncharacterized protein LOC100192513 [Zea mays]
gene-LOC100192514	uncharacterized protein LOC100192514 [Zea mays]
gene-LOC100192515	tRNA methyltransferase [Zea mays]
gene-LOC100192516	uncharacterized protein LOC100192516 [Zea mays]
gene-LOC100192517	PLATZ transcription factor, partial [Zea mays]
gene-LOC100192518	uncharacterized protein LOC100192518 isoform X1 [Zea mays]
gene-LOC100192519	Type III polyketide synthase A [Zea mays]
gene-LOC100192520	putative inositol polyphosphate phosphatase (synaptogenin-like) family protein [Zea mays]
gene-LOC100192521	uncharacterized protein LOC100192521 [Zea mays]
gene-LOC100192522	chitinase 1 [Zea mays]
gene-LOC100192523	uncharacterized protein LOC100192523 isoform X1 [Zea mays]
gene-LOC100192524	uncharacterized protein LOC100192524 [Zea mays]
gene-LOC100192525	putative DUF1618 domain containing family protein [Zea mays]
gene-LOC100192526	uncharacterized protein LOC100192526 [Zea mays]
gene-LOC100192529	uncharacterized LOC100192529 [Zea mays]
gene-LOC100192530	uncharacterized protein LOC100192530 [Zea mays]
gene-LOC100192531	unknown [Zea mays]
gene-LOC100192532	unknown [Zea mays]
gene-LOC100192533	exonuclease DPD1 chloroplastic/mitochondrial isoform X1 [Zea mays]
gene-LOC100192534	putative O-glycosyl hydrolase family 17 protein precursor [Zea mays]
gene-LOC100192535	putative protein phosphatase 2C family protein isoform X1 [Zea mays]
gene-LOC100192536	Syntaxin 43 [Zea mays]
gene-LOC100192537	CASP-like protein 2A1 [Zea mays]
gene-LOC100192538	ubiquinol-cytochrome c reductase iron-sulfur subunit [Zea mays]
gene-LOC100192539	uncharacterized protein LOC100192539 [Zea mays]
gene-LOC100192540	Serine/threonine-protein kinase D6PKL1 [Zea mays]
gene-LOC100192541	uncharacterized LOC100192541 isoform X1 [Zea mays]
gene-LOC100192542	Formin-like protein 1 [Zea mays]
gene-LOC100192543	uncharacterized protein LOC100192543 [Zea mays]
gene-LOC100192544	uncharacterized protein LOC100192544 [Zea mays]
gene-LOC100192546	uncharacterized protein LOC100192546 [Zea mays]
gene-LOC100192547	gl1 protein [Zea mays]
gene-LOC100192548	Plant Tudor-like RNA-binding protein [Zea mays]
gene-LOC100192550	uncharacterized protein LOC100192550 [Zea mays]
gene-LOC100192551	Chloride conductance regulatory protein ICln [Zea mays]
gene-LOC100192554	nucleic acid binding protein [Zea mays]
gene-LOC100192556	uncharacterized LOC100192556 isoform X1 [Zea mays]
gene-LOC100192557	uncharacterized protein LOC100192557 isoform X1 [Zea mays]
gene-LOC100192558	uncharacterized LOC100192558 isoform X2 [Zea mays]
gene-LOC100192559	unknown [Zea mays]
gene-LOC100192560	uncharacterized protein LOC100192560 isoform X1 [Zea mays]
gene-LOC100192561	uncharacterized protein LOC100192561 precursor [Zea mays]
gene-LOC100192562	uncharacterized protein LOC100192562 [Zea mays]
gene-LOC100192564	sphingoid long-chain bases kinase 1 isoform X1 [Zea mays]
gene-LOC100192565	uncharacterized protein LOC100192565 isoform X1 [Zea mays]
gene-LOC100192566	uncharacterized protein LOC100192566 precursor [Zea mays]
gene-LOC100192567	uncharacterized protein LOC100192567 [Zea mays]
gene-LOC100192568	uncharacterized protein LOC100192568 isoform X1 [Zea mays]
gene-LOC100192569	uncharacterized LOC100192569 [Zea mays]
gene-LOC100192570	uncharacterized protein LOC100192570 [Zea mays]
gene-LOC100192571	uncharacterized protein LOC100192571 [Zea mays]
gene-LOC100192572	uncharacterized protein LOC100192572 [Zea mays]
gene-LOC100192573	hypothetical protein PAHAL_G01797 [Panicum hallii]
gene-LOC100192574	uncharacterized protein LOC100192574 isoform 3 [Zea mays]
gene-LOC100192575	iron ion binding protein isoform 1 [Zea mays]
gene-LOC100192576	DNAJ heat shock N-terminal domain-containing protein [Zea mays]
gene-LOC100192577	bHLH transcription factor isoform X1 [Zea mays]
gene-LOC100192578	uncharacterized protein LOC100192578 [Zea mays]
gene-LOC100192579	6,7-dimethyl-8-ribityllumazine synthase [Zea mays]
gene-LOC100192580	uncharacterized protein LOC100192580 [Zea mays]
gene-LOC100192581	Transmembrane protein 18 [Zea mays]
gene-LOC100192583	NADH-ubiquinone oxidoreductase subunit [Zea mays]
gene-LOC100192584	putative protein kinase superfamily protein [Zea mays]
gene-LOC100192585	putative ubiquitin-conjugating enzyme family [Zea mays]
gene-LOC100192586	putative cinnamyl-alcohol dehydrogenase family protein [Zea mays]
gene-LOC100192587	uncharacterized LOC100192587 isoform X1 [Zea mays]
gene-LOC100192588	uncharacterized protein LOC100192588 isoform X1 [Zea mays]
gene-LOC100192589	PREDICTED: histone H3.2 [Musa acuminata subsp. malaccensis]
gene-LOC100192590	uncharacterized protein LOC100192590 isoform X1 [Zea mays]
gene-LOC100192591	uncharacterized protein LOC100192591 [Zea mays]
gene-LOC100192592	DNA excision repair protein ERCC-1 [Zea mays]
gene-LOC100192593	uncharacterized protein LOC100192593 [Zea mays]
gene-LOC100192594	ASC1-like protein [Zea mays]
gene-LOC100192595	uncharacterized protein LOC100192595 isoform X1 [Zea mays]
gene-LOC100192596	unknown [Zea mays]
gene-LOC100192597	chaperone protein dnaJ isoform X1 [Zea mays]
gene-LOC100192598	putative O-Glycosyl hydrolase superfamily protein precursor [Zea mays]
gene-LOC100192599	uncharacterized protein LOC100192599 [Zea mays]
gene-LOC100192600	40S ribosomal protein S23 [Zea mays]
gene-LOC100192602	mtN3-like protein [Zea mays]
gene-LOC100192603	uncharacterized protein LOC100192603 precursor [Zea mays]
gene-LOC100192604	uncharacterized LOC100192604 [Zea mays]
gene-LOC100192605	uncharacterized LOC100192605 [Zea mays]
gene-LOC100192606	uncharacterized protein LOC100192606 isoform X1 [Zea mays]
gene-LOC100192607	calcineurin B-like protein [Zea mays]
gene-LOC100192609	putative MYB DNA-binding domain superfamily protein [Zea mays]
gene-LOC100192611	uncharacterized protein LOC100192611 [Zea mays]
gene-LOC100192612	uncharacterized protein LOC100192612 [Zea mays]
gene-LOC100192613	uncharacterized protein LOC100192613 [Zea mays]
gene-LOC100192614	uncharacterized protein LOC100192614 [Zea mays]
gene-LOC100192615	GDSL esterase/lipase EXL3 [Zea mays]
gene-LOC100192616	uncharacterized protein LOC100192616 [Zea mays]
gene-LOC100192619	uncharacterized protein LOC100192619 [Zea mays]
gene-LOC100192620	putative cytochrome P450 superfamily protein [Zea mays]
gene-LOC100192621	uncharacterized protein LOC100192621 [Zea mays]
gene-LOC100192622	hypothetical protein ZEAMMB73_Zm00001d017626 [Zea mays]
gene-LOC100192625	uncharacterized protein LOC100192625 [Zea mays]
gene-LOC100192626	vesicle transport v-SNARE 12 isoform X1 [Zea mays]
gene-LOC100192627	uncharacterized protein LOC100192627 [Zea mays]
gene-LOC100192628	unknown [Zea mays]
gene-LOC100192629	uncharacterized protein LOC100192629 [Zea mays]
gene-LOC100192630	uncharacterized protein LOC100192630 isoform X1 [Zea mays]
gene-LOC100192631	indole-2-monooxygenase isoform X1 [Zea mays]
gene-LOC100192632	uncharacterized protein LOC100192632 [Zea mays]
gene-LOC100192633	hypothetical protein ZEAMMB73_Zm00001d053165 [Zea mays]
gene-LOC100192634	TSL-kinase interacting protein 1 isoform X2 [Zea mays]
gene-LOC100192635	uncharacterized protein LOC100192635 [Zea mays]
gene-LOC100192636	uncharacterized protein LOC100192636 isoform X1 [Zea mays]
gene-LOC100192638	uncharacterized protein LOC100192638 [Zea mays]
gene-LOC100192639	uncharacterized protein LOC100192639 [Zea mays]
gene-LOC100192640	uncharacterized protein LOC100192640 [Zea mays]
gene-LOC100192643	secondary wall NAC transcription factor 4 [Zea mays]
gene-LOC100192644	uncharacterized protein LOC100192644 [Zea mays]
gene-LOC100192645	activator of basal transcription 1 [Zea mays]
gene-LOC100192646	hypothetical protein [Zea mays]
gene-LOC100192647	sterol methyl transferase 2 [Zea mays]
gene-LOC100192648	uncharacterized protein LOC100192648 precursor [Zea mays]
gene-LOC100192649	uncharacterized protein LOC100192649 isoform X1 [Zea mays]
gene-LOC100192650	uncharacterized protein LOC100192650 [Zea mays]
gene-LOC100192651	uncharacterized LOC100192651 isoform X1 [Zea mays]
gene-LOC100192652	uncharacterized protein LOC100192652 [Zea mays]
gene-LOC100192653	uncharacterized protein LOC100192653 [Zea mays]
gene-LOC100192654	uncharacterized protein LOC100192654 [Zea mays]
gene-LOC100192656	uncharacterized protein LOC100192656 [Zea mays]
gene-LOC100192658	putative bZIP transcription factor superfamily protein isoform X1 [Zea mays]
gene-LOC100192661	uncharacterized LOC100192661 [Zea mays]
gene-LOC100192663	uncharacterized LOC100192663 precursor [Zea mays]
gene-LOC100192664	SAUR37-auxin-responsive SAUR family member [Zea mays]
gene-LOC100192665	nucleic acid binding protein [Zea mays]
gene-LOC100192666	uncharacterized protein LOC100192666 [Zea mays]
gene-LOC100192667	uncharacterized protein LOC100192667 isoform X1 [Zea mays]
gene-LOC100192668	uncharacterized LOC100192668 isoform X1 [Zea mays]
gene-LOC100192669	uncharacterized protein LOC100192669 [Zea mays]
gene-LOC100192670	uncharacterized LOC100192670 [Zea mays]
gene-LOC100192671	uncharacterized protein LOC100192671 [Zea mays]
gene-LOC100192672	transmembrane 9 superfamily protein member 3 precursor [Zea mays]
gene-LOC100192674	tRNA/rRNA methyltransferase (SpoU) family protein [Zea mays]
gene-LOC100192675	zinc knuckle (CCHC-type) family protein [Zea mays]
gene-LOC100192676	uncharacterized LOC100192676 isoform X1 [Zea mays]
gene-LOC100192677	hypothetical protein ZEAMMB73_Zm00001d004083 [Zea mays]
gene-LOC100192678	uncharacterized protein LOC100192678 [Zea mays]
gene-LOC100192679	uncharacterized protein LOC100192679 [Zea mays]
gene-LOC100192681	putative RING zinc finger domain superfamily protein isoform X1 [Zea mays]
gene-LOC100192682	uncharacterized LOC100192682 isoform X1 [Zea mays]
gene-LOC100192683	uncharacterized protein LOC100192683 [Zea mays]
gene-LOC100192684	putative ubiquitin-conjugating enzyme family isoform X1 [Zea mays]
gene-LOC100192685	uncharacterized protein LOC100192685 [Zea mays]
gene-LOC100192686	uncharacterized protein LOC100192686 isoform X1 [Zea mays]
gene-LOC100192687	unknown [Zea mays]
gene-LOC100192688	COP9 signalosome complex subunit 4 isoform X1 [Zea mays]
gene-LOC100192689	uncharacterized protein LOC100192689 isoform X1 [Zea mays]
gene-LOC100192690	uncharacterized protein LOC100192690 isoform X1 [Zea mays]
gene-LOC100192691	uncharacterized LOC100192691 [Zea mays]
gene-LOC100192694	P-loop containing nucleoside triphosphate hydrolase superfamily protein [Zea mays]
gene-LOC100192695	uncharacterized protein LOC100192695 [Zea mays]
gene-LOC100192696	uncharacterized protein LOC100192696 [Zea mays]
gene-LOC100192697	uncharacterized protein LOC100192697 [Zea mays]
gene-LOC100192698	uncharacterized protein LOC100192698 [Zea mays]
gene-LOC100192699	oligosaccharyl transferase STT3 subunit [Zea mays]
gene-LOC100192700	peroxisomal membrane protein PEX11-1 [Zea mays]
gene-LOC100192701	uncharacterized protein LOC100192701 precursor [Zea mays]
gene-LOC100192702	uncharacterized protein LOC100192702 precursor [Zea mays]
gene-LOC100192703	zinc knuckle (CCHC-type) family protein isoform X1 [Zea mays]
gene-LOC100192704	uncharacterized protein LOC100192704 [Zea mays]
gene-LOC100192706	uncharacterized protein LOC100192706 [Zea mays]
gene-LOC100192707	uncharacterized protein LOC100192707 isoform X1 [Zea mays]
gene-LOC100192708	uncharacterized protein LOC100192708 isoform X1 [Zea mays]
gene-LOC100192709	putative bZIP transcription factor superfamily protein [Zea mays]
gene-LOC100192710	uncharacterized protein LOC100192710 [Zea mays]
gene-LOC100192711	uncharacterized LOC100192711 [Zea mays]
gene-LOC100192712	uncharacterized protein LOC100192712 [Zea mays]
gene-LOC100192713	uncharacterized protein LOC100192713 [Zea mays]
gene-LOC100192715	uncharacterized LOC100192715 [Zea mays]
gene-LOC100192716	uncharacterized protein LOC100192716 [Zea mays]
gene-LOC100192718	C2 domain-containing protein [Zea mays]
gene-LOC100192719	Small nuclear ribonucleoprotein F [Zea mays]
gene-LOC100192720	uncharacterized protein LOC100192720 [Zea mays]
gene-LOC100192721	uncharacterized protein LOC100192721 isoform X1 [Zea mays]
gene-LOC100192722	uncharacterized protein LOC100192722 [Zea mays]
gene-LOC100192725	protein disulfide isomerase isoform X1 [Zea mays]
gene-LOC100192727	uncharacterized protein LOC100192727 [Zea mays]
gene-LOC100192728	uncharacterized protein LOC100192728 [Zea mays]
gene-LOC100192729	uncharacterized LOC100192729 isoform X1 [Zea mays]
gene-LOC100192730	uncharacterized protein LOC100192730 [Zea mays]
gene-LOC100192731	OSJNBa0072D21.11-like protein [Zea mays]
gene-LOC100192732	uncharacterized protein LOC100192732 [Zea mays]
gene-LOC100192733	peptidyl-prolyl cis-trans isomerase CYP18-2 [Zea mays]
gene-LOC100192734	uncharacterized protein LOC100192734 isoform X1 [Zea mays]
gene-LOC100192735	putative ubiquitin-conjugating enzyme family [Zea mays]
gene-LOC100192736	uncharacterized protein LOC100192736 [Zea mays]
gene-LOC100192737	uncharacterized protein LOC100192737 [Zea mays]
gene-LOC100192738	uncharacterized LOC100192738 isoform X1 [Zea mays]
gene-LOC100192739	uncharacterized protein LOC100192739 [Zea mays]
gene-LOC100192740	uncharacterized protein LOC100192740 isoform 1 [Zea mays]
gene-LOC100192741	putative seven in absentia domain family protein [Zea mays]
gene-LOC100192742	uncharacterized protein LOC100192742 [Zea mays]
gene-LOC100192743	uncharacterized protein LOC100192743 [Zea mays]
gene-LOC100192744	uncharacterized LOC100192744 [Zea mays]
gene-LOC100192745	ubiquitin ligase protein FANCL isoform X1 [Zea mays]
gene-LOC100192746	hypothetical protein PHYPA_023132 [Physcomitrella patens]
gene-LOC100192747	ALFIN-like transcription factor [Zea mays]
gene-LOC100192749	histone-lysine N-methyltransferase ASHR1 [Zea mays]
gene-LOC100192750	putative homeodomain-like transcription factor superfamily protein [Zea mays]
gene-LOC100192752	uncharacterized protein LOC100192752 isoform X1 [Zea mays]
gene-LOC100192753	unknown [Zea mays]
gene-LOC100192754	uncharacterized protein LOC100192754 isoform X1 [Zea mays]
gene-LOC100192755	F-box protein [Zea mays]
gene-LOC100192756	uncharacterized protein LOC100192756 [Zea mays]
gene-LOC100192757	uncharacterized protein LOC100192757 isoform X1 [Zea mays]
gene-LOC100192758	putative protein kinase superfamily protein [Zea mays]
gene-LOC100192759	uncharacterized protein LOC100192759 [Zea mays]
gene-LOC100192760	myosin heavy chain [Zea mays]
gene-LOC100192761	Peroxidase 12 [Zea mays]
gene-LOC100192762	protein MEI2-like 4 isoform X1 [Zea mays]
gene-LOC100192764	uncharacterized protein LOC100192764 [Zea mays]
gene-LOC100192765	uncharacterized protein LOC100192765 [Zea mays]
gene-LOC100192766	uncharacterized protein LOC100192766 [Zea mays]
gene-LOC100192768	uncharacterized LOC100192768 [Zea mays]
gene-LOC100192769	uncharacterized protein LOC100192769 [Zea mays]
gene-LOC100192770	uncharacterized protein LOC100192770 [Zea mays]
gene-LOC100192771	uncharacterized protein LOC100192771 isoform X1 [Zea mays]
gene-LOC100192772	uncharacterized protein LOC100192772 [Zea mays]
gene-LOC100192773	unknown [Zea mays]
gene-LOC100192774	uncharacterized protein LOC100192774 [Zea mays]
gene-LOC100192775	uncharacterized protein LOC100192775 [Zea mays]
gene-LOC100192776	uncharacterized protein LOC100192776 [Zea mays]
gene-LOC100192777	putative kelch repeat-containing protein containing ser/thr protein kinase family protein [Zea mays]
gene-LOC100192778	60S ribosomal protein L22-2 [Zea mays]
gene-LOC100192779	uncharacterized protein LOC100192779 [Zea mays]
gene-LOC100192780	uncharacterized protein LOC100192780 isoform X1 [Zea mays]
gene-LOC100192782	uncharacterized protein LOC100192782 [Zea mays]
gene-LOC100192783	uncharacterized LOC100192783 [Zea mays]
gene-LOC100192784	unknown [Zea mays]
gene-LOC100192785	uncharacterized protein LOC100192785 [Zea mays]
gene-LOC100192786	bifunctional TENA2 protein [Zea mays]
gene-LOC100192787	uncharacterized protein LOC100192787 precursor [Zea mays]
gene-LOC100192788	uncharacterized LOC100192788 [Zea mays]
gene-LOC100192789	prenylated Rab receptor 2 [Zea mays]
gene-LOC100192790	uncharacterized LOC100192790 [Zea mays]
gene-LOC100192791	cell division cycle protein 27 homolog B isoform X1 [Zea mays]
gene-LOC100192792	histone H2B.2-like [Aegilops tauschii subsp. tauschii]
gene-LOC100192793	unknown [Zea mays]
gene-LOC100192794	uncharacterized protein LOC100192794 isoform X1 [Zea mays]
gene-LOC100192795	uncharacterized protein LOC100192795 [Zea mays]
gene-LOC100192797	uncharacterized protein LOC100192797 [Zea mays]
gene-LOC100192798	nudix hydrolase 23 [Zea mays]
gene-LOC100192799	tetratricopeptide repeat (TPR)-like superfamily protein isoform X1 [Zea mays]
gene-LOC100192800	uncharacterized LOC100192800 [Zea mays]
gene-LOC100192801	uncharacterized LOC100192801 [Zea mays]
gene-LOC100192802	uncharacterized LOC100192802 isoform 1 [Zea mays]
gene-LOC100192803	uncharacterized protein LOC100192803 [Zea mays]
gene-LOC100192804	putative protein kinase superfamily protein isoform X1 [Zea mays]
gene-LOC100192805	uncharacterized protein LOC100192805 [Zea mays]
gene-LOC100192806	uncharacterized protein LOC100192806 isoform X1 [Zea mays]
gene-LOC100192807	heme oxygenase2 [Zea mays]
gene-LOC100192808	unknown [Zea mays]
gene-LOC100192809	proteasome subunit alpha type-2-like [Zea mays]
gene-LOC100192810	uncharacterized protein LOC100192810 [Zea mays]
gene-LOC100192811	uncharacterized protein LOC100192811 [Zea mays]
gene-LOC100192813	uncharacterized protein LOC100192813 [Zea mays]
gene-LOC100192814	hypothetical protein ZEAMMB73_Zm00001d033301 [Zea mays]
gene-LOC100192815	phosphopantothenoylcysteine decarboxylase [Zea mays]
gene-LOC100192816	putative MYB DNA-binding domain superfamily protein [Zea mays]
gene-LOC100192817	Double-stranded RNA binding motif protein family [Zea mays]
gene-LOC100192818	cell division control protein 48 homolog B [Zea mays]
gene-LOC100192819	uncharacterized protein LOC100192819 [Zea mays]
gene-LOC100192820	uncharacterized protein LOC100192820 [Zea mays]
gene-LOC100192821	arginine/serine-rich splicing factor RSP41 [Zea mays]
gene-LOC100192822	uncharacterized protein LOC100192822 [Zea mays]
gene-LOC100192823	uncharacterized protein LOC100192823 precursor [Zea mays]
gene-LOC100192824	cAMP-regulated phosphoprotein 19-related protein [Zea mays]
gene-LOC100192825	uncharacterized protein LOC100192825 [Zea mays]
gene-LOC100192826	putative RING zinc finger domain superfamily protein [Zea mays]
gene-LOC100192827	uncharacterized protein LOC100192827 [Zea mays]
gene-LOC100192828	uncharacterized protein LOC100192828 [Zea mays]
gene-LOC100192829	uncharacterized protein LOC100192829 [Zea mays]
gene-LOC100192830	leucine-rich repeat (LRR) family protein precursor [Zea mays]
gene-LOC100192831	uncharacterized protein 114 precursor [Zea mays]
gene-LOC100192832	E3 SUMO-protein ligase MMS21 isoform 1 [Zea mays]
gene-LOC100192833	uncharacterized protein LOC100192833 [Zea mays]
gene-LOC100192834	uncharacterized LOC100192834 isoform X1 [Zea mays]
gene-LOC100192835	60 ribosomal protein L14 [Zea mays]
gene-LOC100192836	uncharacterized protein LOC100192836 isoform X1 [Zea mays]
gene-LOC100192837	uncharacterized protein LOC100192837 [Zea mays]
gene-LOC100192838	unknown [Zea mays]
gene-LOC100192839	uncharacterized protein LOC100192839 [Zea mays]
gene-LOC100192840	uncharacterized protein LOC100192840 [Zea mays]
gene-LOC100192842	uncharacterized protein LOC100192842 [Zea mays]
gene-LOC100192844	E3 ubiquitin-protein ligase ATL6 [Zea mays]
gene-LOC100192845	uncharacterized protein LOC100192845 [Zea mays]
gene-LOC100192846	uncharacterized protein LOC100192846 isoform X1 [Zea mays]
gene-LOC100192847	uncharacterized protein LOC100192847 [Zea mays]
gene-LOC100192848	putative cytochrome P450 superfamily protein [Zea mays]
gene-LOC100192849	BTB/POZ domain-containing protein [Zea mays]
gene-LOC100192850	uroporphyrinogen decarboxylase 1, chloroplastic [Sorghum bicolor]
gene-LOC100192851	uncharacterized protein LOC100192851 [Zea mays]
gene-LOC100192852	uncharacterized LOC100192852 isoform X1 [Zea mays]
gene-LOC100192853	lustrin A precursor [Zea mays]
gene-LOC100192854	uncharacterized protein LOC100278387 isoform X1 [Zea mays]
gene-LOC100192855	uncharacterized protein LOC100192855 isoform X1 [Zea mays]
gene-LOC100192856	SAM domain protein [Zea mays]
gene-LOC100192857	hypothetical protein [Zea mays]
gene-LOC100192858	uncharacterized protein LOC100192858 precursor [Zea mays]
gene-LOC100192859	uncharacterized LOC100192859 [Zea mays]
gene-LOC100192860	uncharacterized protein LOC100192860 [Zea mays]
gene-LOC100192861	uncharacterized protein LOC100192861 [Zea mays]
gene-LOC100192862	uncharacterized protein LOC100192862 [Zea mays]
gene-LOC100192863	uncharacterized protein LOC100192863 [Zea mays]
gene-LOC100192864	unknown [Zea mays]
gene-LOC100192865	proteasome subunit beta type isoform X1 [Zea mays]
gene-LOC100192866	uncharacterized LOC100192866 isoform X1 [Zea mays]
gene-LOC100192867	uncharacterized protein LOC100192867 [Zea mays]
gene-LOC100192868	LHY protein isoform X1 [Zea mays]
gene-LOC100192869	hypersensitive-induced reaction protein 4 [Zea mays]
gene-LOC100192870	uncharacterized protein LOC100192870 [Zea mays]
gene-LOC100192871	alpha-L-fucosidase 1 precursor [Zea mays]
gene-LOC100192872	uncharacterized protein LOC100192872 [Zea mays]
gene-LOC100192874	uncharacterized protein LOC100192874 isoform X3 [Zea mays]
gene-LOC100192876	uncharacterized LOC100192876 [Zea mays]
gene-LOC100192877	uncharacterized protein LOC100192877 [Zea mays]
gene-LOC100192878	uncharacterized protein LOC100192878 [Zea mays]
gene-LOC100192879	26S proteasome non-ATPase regulatory subunit 8 [Zea mays]
gene-LOC100192880	uncharacterized protein LOC100192880 isoform X1 [Zea mays]
gene-LOC100192881	uncharacterized protein LOC100192881 isoform 1 [Zea mays]
gene-LOC100192883	DNA repair endonuclease UVH1 isoform X1 [Zea mays]
gene-LOC100192884	uncharacterized protein LOC100192884 [Zea mays]
gene-LOC100192885	uncharacterized protein LOC100192885 [Zea mays]
gene-LOC100192886	uncharacterized LOC100192886 [Zea mays]
gene-LOC100192887	uncharacterized protein LOC100192887 isoform X1 [Zea mays]
gene-LOC100192888	uncharacterized protein LOC100192888 [Zea mays]
gene-LOC100192889	uncharacterized protein LOC100192889 [Zea mays]
gene-LOC100192890	uncharacterized protein LOC100192890 [Zea mays]
gene-LOC100192891	hypothetical protein [Zea mays]
gene-LOC100192893	uncharacterized protein LOC100192893 [Zea mays]
gene-LOC100192894	putative WRKY DNA-binding domain superfamily protein [Zea mays]
gene-LOC100192895	uncharacterized protein LOC100192895 [Zea mays]
gene-LOC100192896	uncharacterized protein LOC100192896 isoform X1 [Zea mays]
gene-LOC100192897	uncharacterized protein LOC100192897 isoform X1 [Zea mays]
gene-LOC100192898	uncharacterized protein LOC100192898 [Zea mays]
gene-LOC100192899	4-phosphopantetheinyl transferase sfp [Zea mays]
gene-LOC100192900	uncharacterized protein LOC100192900 [Zea mays]
gene-LOC100192901	putative protein of unknown function (DUF640) domain family protein [Zea mays]
gene-LOC100192902	uncharacterized protein LOC100192902 [Zea mays]
gene-LOC100192903	Splicing factor U2AF subunit [Zea mays]
gene-LOC100192904	uncharacterized protein LOC100192904 [Zea mays]
gene-LOC100192905	uncharacterized protein DDB_G0271670 [Zea mays]
gene-LOC100192907	uncharacterized protein LOC100192907 [Zea mays]
gene-LOC100192908	ubiquitin-conjugating enzyme E2 variant 1 [Zea mays]
gene-LOC100192909	uncharacterized protein LOC100192909 [Zea mays]
gene-LOC100192910	fumarylacetoacetase [Zea mays]
gene-LOC100192912	protein PAIR1 [Zea mays]
gene-LOC100192913	glycine-rich domain-containing protein 2 isoform X1 [Zea mays]
gene-LOC100192914	uncharacterized protein LOC100192914 [Zea mays]
gene-LOC100192917	uncharacterized protein LOC100192917 [Zea mays]
gene-LOC100192918	alpha/beta-Hydrolases superfamily protein precursor [Zea mays]
gene-LOC100192919	uncharacterized LOC100192919 [Zea mays]
gene-LOC100192920	uncharacterized protein LOC100192920 [Zea mays]
gene-LOC100192921	uncharacterized protein LOC100192921 [Zea mays]
gene-LOC100192922	unknown [Zea mays]
gene-LOC100192923	vacuolar protein sorting-associated protein 54, chloroplastic [Zea mays]
gene-LOC100192924	uncharacterized protein LOC100192924 [Zea mays]
gene-LOC100192925	putative RING zinc finger domain superfamily protein [Zea mays]
gene-LOC100192926	uncharacterized protein LOC100192926 [Zea mays]
gene-LOC100192928	hypothetical protein LSAT_5X140521 [Lactuca sativa]
gene-LOC100192929	Ninja-family protein 1 isoform 1 [Zea mays]
gene-LOC100192930	methyltransferase-like protein 13 [Zea mays]
gene-LOC100192931	hypothetical protein SETIT_032292mg, partial [Setaria italica]
gene-LOC100192932	uncharacterized protein LOC100192932 [Zea mays]
gene-LOC100192933	uncharacterized protein LOC100192933 isoform X1 [Zea mays]
gene-LOC100192934	Peptidyl-prolyl cis-trans isomerase CYP95 [Zea mays]
gene-LOC100192935	uncharacterized protein LOC100192935 [Zea mays]
gene-LOC100192936	delta3,5-delta2,4-dienoyl-CoA isomerase [Zea mays]
gene-LOC100192937	uncharacterized protein LOC100192937 isoform X1 [Zea mays]
gene-LOC100192938	putative RING zinc finger domain superfamily protein [Zea mays]
gene-LOC100192939	uncharacterized protein LOC100192939 precursor [Zea mays]
gene-LOC100192940	uncharacterized protein LOC100192940 [Zea mays]
gene-LOC100192942	exo70 exocyst complex subunit family protein [Zea mays]
gene-LOC100192944	uncharacterized protein LOC100192944 [Zea mays]
gene-LOC100192945	CAAX prenyl protease 2 [Zea mays]
gene-LOC100192946	uncharacterized protein LOC100192946 [Zea mays]
gene-LOC100192947	uncharacterized protein LOC100192947 [Zea mays]
gene-LOC100192949	uncharacterized protein LOC100192949 [Zea mays]
gene-LOC100192950	uncharacterized protein LOC100192950 [Zea mays]
gene-LOC100192952	ubiquitin [Zea mays]
gene-LOC100192953	uncharacterized protein LOC100192953 precursor [Zea mays]
gene-LOC100192954	uncharacterized LOC100192954 [Zea mays]
gene-LOC100192955	uncharacterized protein LOC100192955 [Zea mays]
gene-LOC100192956	putative bZIP transcription factor superfamily protein isoform X1 [Zea mays]
gene-LOC100192958	uncharacterized protein LOC100192958 isoform X1 [Zea mays]
gene-LOC100192961	putative MYB DNA-binding domain superfamily protein [Zea mays]
gene-LOC100192962	uncharacterized protein LOC100192962 [Zea mays]
gene-LOC100192963	ribosomal protein [Zea mays]
gene-LOC100192964	RNase PH homolog [Zea mays]
gene-LOC100192965	uncharacterized protein LOC100192965 [Zea mays]
gene-LOC100192966	uncharacterized protein LOC100192966 [Zea mays]
gene-LOC100192967	GTP-binding protein ERG isoform 1 [Zea mays]
gene-LOC100192968	uncharacterized protein LOC100192968 [Zea mays]
gene-LOC100192969	endoglucanase 1 precursor [Zea mays]
gene-LOC100192973	unknown [Zea mays]
gene-LOC100192974	uncharacterized protein LOC100192974 [Zea mays]
gene-LOC100192975	unknown [Zea mays]
gene-LOC100192976	phytochromeC2 [Zea mays]
gene-LOC100192977	methionine aminopeptidase isoform X1 [Zea mays]
gene-LOC100192978	uncharacterized protein LOC100192978 isoform X1 [Zea mays]
gene-LOC100192979	uncharacterized protein LOC100192979 precursor [Zea mays]
gene-LOC100192981	uncharacterized protein LOC100192981 [Zea mays]
gene-LOC100192984	uncharacterized protein LOC100192984 [Zea mays]
gene-LOC100192985	uncharacterized protein LOC100192985 isoform X1 [Zea mays]
gene-LOC100192986	uncharacterized protein LOC100192986 [Zea mays]
gene-LOC100192987	TRAF-like superfamily protein [Zea mays]
gene-LOC100192989	uncharacterized protein LOC100192989 [Zea mays]
gene-LOC100192991	eukaryotic translation initiation factor 5A-1/2 [Zea mays]
gene-LOC100192992	TLD-domain containing nucleolar protein isoform X1 [Zea mays]
gene-LOC100192993	uncharacterized protein LOC100192993 isoform X1 [Zea mays]
gene-LOC100192994	B3 domain-containing protein [Zea mays]
gene-LOC100192995	Senescence-associated protein 5 [Zea mays]
gene-LOC100192996	uncharacterized protein LOC100192996 [Zea mays]
gene-LOC100192997	uncharacterized protein LOC100192997 [Zea mays]
gene-LOC100192998	uncharacterized protein LOC100192998 isoform X1 [Zea mays]
gene-LOC100192999	exocyst complex component EXO84C [Zea mays]
gene-LOC100193000	uncharacterized protein LOC100193000 [Zea mays]
gene-LOC100193002	unknown [Zea mays]
gene-LOC100193003	unknown [Zea mays]
gene-LOC100193004	uncharacterized protein LOC100193004 precursor [Zea mays]
gene-LOC100193006	uncharacterized protein LOC100193006 [Zea mays]
gene-LOC100193007	uncharacterized protein LOC100193007 isoform X1 [Zea mays]
gene-LOC100193008	uncharacterized protein LOC100193008 [Zea mays]
gene-LOC100193009	uncharacterized protein LOC100193009 [Zea mays]
gene-LOC100193010	uncharacterized protein LOC100193010 [Zea mays]
gene-LOC100193011	putative DEAD-box ATP-dependent RNA helicase family protein [Zea mays]
gene-LOC100193012	unknown [Zea mays]
gene-LOC100193013	unknown [Zea mays]
gene-LOC100193014	histone H2B.2-like [Aegilops tauschii subsp. tauschii]
gene-LOC100193015	uncharacterized protein LOC100193015 isoform X1 [Zea mays]
gene-LOC100193016	uncharacterized protein LOC100193016 [Zea mays]
gene-LOC100193017	uncharacterized protein LOC100193017 [Zea mays]
gene-LOC100193018	putative protein kinase superfamily protein [Zea mays]
gene-LOC100193019	protein-L-isoaspartate O-methyltransferase [Zea mays]
gene-LOC100193020	uncharacterized protein LOC100193020 [Zea mays]
gene-LOC100193021	uncharacterized protein LOC100193021 [Zea mays]
gene-LOC100193022	grx_S16-glutaredoxin subgroup II [Zea mays]
gene-LOC100193023	uncharacterized protein LOC100193023 isoform X1 [Zea mays]
gene-LOC100193024	uncharacterized protein LOC100193024 isoform X1 [Zea mays]
gene-LOC100193025	putative laccase family protein isoform X1 [Zea mays]
gene-LOC100193026	uncharacterized protein LOC100193026 [Zea mays]
gene-LOC100193027	AP-1 complex subunit gamma-1 [Zea mays]
gene-LOC100193028	uncharacterized protein LOC100193028 [Zea mays]
gene-LOC100193029	uncharacterized protein LOC100193029 [Zea mays]
gene-LOC100193030	CCR4-NOT transcription complex subunit 8 [Zea mays]
gene-LOC100193031	uncharacterized protein LOC100193031 [Zea mays]
gene-LOC100193032	uncharacterized protein LOC100193032 [Zea mays]
gene-LOC100193033	glycine-rich protein [Zea mays]
gene-LOC100193034	uncharacterized protein LOC100193034 precursor [Zea mays]
gene-LOC100193035	uncharacterized protein LOC100193035 [Zea mays]
gene-LOC100193036	uncharacterized protein LOC100193036 [Zea mays]
gene-LOC100193037	uncharacterized LOC100193037 isoform X1 [Zea mays]
gene-LOC100193038	Polyamine transporter RMV1 [Zea mays]
gene-LOC100193039	fiber protein Fb2 [Zea mays]
gene-LOC100193040	uncharacterized protein LOC100193040 [Zea mays]
gene-LOC100193041	uncharacterized protein LOC100193041 [Zea mays]
gene-LOC100193042	hypothetical protein ZEAMMB73_Zm00001d022108 [Zea mays]
gene-LOC100193043	uncharacterized protein LOC100193043 [Zea mays]
gene-LOC100193044	uncharacterized protein LOC100193044 [Zea mays]
gene-LOC100193045	uncharacterized protein LOC100193045 [Zea mays]
gene-LOC100193046	uncharacterized protein LOC100193046 [Zea mays]
gene-LOC100193047	uncharacterized protein LOC100193047 [Zea mays]
gene-LOC100193048	uncharacterized protein LOC100193048 [Zea mays]
gene-LOC100193049	protein SYS1 [Zea mays]
gene-LOC100193050	putative knotted-like transcription factor family protein [Zea mays]
gene-LOC100193051	uncharacterized protein LOC100193051 [Zea mays]
gene-LOC100193052	uncharacterized LOC100193052 [Zea mays]
gene-LOC100193054	uncharacterized protein LOC100193054 [Zea mays]
gene-LOC100193056	uncharacterized protein LOC100193056 [Zea mays]
gene-LOC100193057	putative AP2/EREBP transcription factor superfamily protein isoform X1 [Zea mays]
gene-LOC100193058	uncharacterized protein LOC100193058 isoform X2 [Zea mays]
gene-LOC100193059	uncharacterized protein LOC100193059 [Zea mays]
gene-LOC100193060	uncharacterized protein LOC100193060 [Zea mays]
gene-LOC100193061	DEAD-box ATP-dependent RNA helicase 7 [Zea mays]
gene-LOC100193062	uncharacterized protein LOC100193062 precursor [Zea mays]
gene-LOC100193064	putative protein phosphatase 2C family protein [Zea mays]
gene-LOC100193065	uncharacterized LOC100193065 [Zea mays]
gene-LOC100193067	putative O-methyltransferase 2 [Zea mays]
gene-LOC100193068	uncharacterized protein LOC100193068 [Zea mays]
gene-LOC100193069	uncharacterized protein LOC100193069 [Zea mays]
gene-LOC100193070	Peroxisomal (S)-2-hydroxy-acid oxidase GLO4 [Zea mays]
gene-LOC100193071	putative bZIP transcription factor superfamily protein [Zea mays]
gene-LOC100193072	cell division control protein 50 isoform X1 [Zea mays]
gene-LOC100193073	uncharacterized protein LOC100193073 isoform X1 [Zea mays]
gene-LOC100193074	Profilin homolog5 [Zea mays]
gene-LOC100193076	uncharacterized protein LOC100193076 [Zea mays]
gene-LOC100193079	uncharacterized protein LOC100193079 [Zea mays]
gene-LOC100193080	uncharacterized protein LOC100193080 [Zea mays]
gene-LOC100193083	uncharacterized protein LOC100193083 isoform X1 [Zea mays]
gene-LOC100193084	uncharacterized protein LOC100193084 [Zea mays]
gene-LOC100193085	uncharacterized protein LOC100193085 [Zea mays]
gene-LOC100193086	uncharacterized protein LOC100193086 isoform X2 [Zea mays]
gene-LOC100193087	uncharacterized protein LOC100193087 isoform X1 [Zea mays]
gene-LOC100193088	uncharacterized protein LOC100193088 [Zea mays]
gene-LOC100193089	uncharacterized protein LOC100193089 precursor [Zea mays]
gene-LOC100193090	integral membrane protein like protein [Zea mays]
gene-LOC100193091	uncharacterized protein LOC100193091 [Zea mays]
gene-LOC100193092	hypothetical protein ZEAMMB73_Zm00001d014542 [Zea mays]
gene-LOC100193094	NF-YA11 [Zea mays]
gene-LOC100193095	uncharacterized protein LOC100193095 [Zea mays]
gene-LOC100193096	uncharacterized protein LOC100193096 [Zea mays]
gene-LOC100193097	uncharacterized protein LOC100193097 [Zea mays]
gene-LOC100193098	WRI1 transcription factor 2 [Zea mays]
gene-LOC100193099	unknown [Zea mays]
gene-LOC100193100	uncharacterized protein LOC100193100 [Zea mays]
gene-LOC100193101	hypothetical protein [Zea mays]
gene-LOC100193102	Protein kinase superfamily protein [Zea mays]
gene-LOC100193104	uncharacterized protein LOC100193104 precursor [Zea mays]
gene-LOC100193106	Small nuclear ribonucleoprotein family protein [Zea mays]
gene-LOC100193107	SKP1-like protein 1A [Zea mays]
gene-LOC100193108	uncharacterized protein LOC100193108 [Zea mays]
gene-LOC100193109	uncharacterized protein LOC100193109 [Zea mays]
gene-LOC100193110	uncharacterized protein LOC100193110 [Zea mays]
gene-LOC100193112	uncharacterized protein LOC100193112 [Zea mays]
gene-LOC100193113	uncharacterized LOC100193113 [Zea mays]
gene-LOC100193114	OSJNBb0022F23.8-like protein [Zea mays]
gene-LOC100193115	probable acetyltransferase NATA1-like [Zea mays]
gene-LOC100193116	putative RING zinc finger domain superfami isoform 1 [Zea mays]
gene-LOC100193117	uncharacterized protein LOC100193117 isoform X1 [Zea mays]
gene-LOC100193118	uncharacterized protein LOC100193118 [Zea mays]
gene-LOC100193119	uncharacterized protein LOC100193119 [Zea mays]
gene-LOC100193120	uncharacterized protein LOC100193120 isoform X1 [Zea mays]
gene-LOC100193121	uncharacterized protein LOC100193121 precursor [Zea mays]
gene-LOC100193122	P-loop containing nucleoside triphosphate hydrolase superfamily protein [Zea mays]
gene-LOC100193124	myosin-like protein [Zea mays]
gene-LOC100193125	uncharacterized protein LOC100193125 [Zea mays]
gene-LOC100193126	uncharacterized protein LOC100193126 [Zea mays]
gene-LOC100193128	uncharacterized protein LOC100193128 [Zea mays]
gene-LOC100193129	uncharacterized protein LOC100193129 [Zea mays]
gene-LOC100193130	uncharacterized protein LOC100193130 [Zea mays]
gene-LOC100193132	uncharacterized protein LOC100193132 [Zea mays]
gene-LOC100193134	serine/threonine-protein kinase 19 [Zea mays]
gene-LOC100193135	uncharacterized protein LOC100193135 [Zea mays]
gene-LOC100193136	uncharacterized protein LOC100193136 [Zea mays]
gene-LOC100193137	exosome complex exonuclease RRP43 isoform X1 [Zea mays]
gene-LOC100193139	uncharacterized 100193139 [Zea mays]
gene-LOC100193140	proteasome subunit alpha type [Zea mays]
gene-LOC100193141	uncharacterized protein LOC100193141 [Zea mays]
gene-LOC100193142	Dof zinc finger protein DOF2.1 [Zea mays]
gene-LOC100193143	putative AP2/EREBP transcription factor superfamily protein isoform X1 [Zea mays]
gene-LOC100193144	uncharacterized protein LOC100193144 isoform X1 [Zea mays]
gene-LOC100193145	Pumilio homolog 5 [Zea mays]
gene-LOC100193146	unknown [Zea mays]
gene-LOC100193148	uncharacterized LOC100193148 [Zea mays]
gene-LOC100193149	putative protein kinase superfamily protein [Zea mays]
gene-LOC100193150	uncharacterized protein LOC100193150 [Zea mays]
gene-LOC100193151	uncharacterized protein LOC100193151 precursor [Zea mays]
gene-LOC100193152	uncharacterized LOC100193152 [Zea mays]
gene-LOC100193153	uncharacterized LOC100193153 [Zea mays]
gene-LOC100193154	uncharacterized protein LOC100193154 [Zea mays]
gene-LOC100193155	40S ribosomal protein S4-like protein [Zea mays]
gene-LOC100193156	uncharacterized protein LOC100193156 [Zea mays]
gene-LOC100193157	uncharacterized protein LOC100193157 isoform X1 [Zea mays]
gene-LOC100193158	uncharacterized protein LOC100193158 [Zea mays]
gene-LOC100193159	uncharacterized protein LOC100193159 [Zea mays]
gene-LOC100193160	Transcription factor bHLH62 [Zea mays]
gene-LOC100193161	pseudouridylate synthase [Zea mays]
gene-LOC100193162	uncharacterized protein LOC100193162 isoform X1 [Zea mays]
gene-LOC100193164	calcium ion binding protein [Zea mays]
gene-LOC100193166	uncharacterized protein LOC100193166 isoform X1 [Zea mays]
gene-LOC100193167	putative HLH DNA-binding domain superfamily protein [Zea mays]
gene-LOC100193168	hypothetical protein ZEAMMB73_Zm00001d005772 [Zea mays]
gene-LOC100193169	tub family member [Zea mays]
gene-LOC100193170	uncharacterized LOC100193170 isoform X1 [Zea mays]
gene-LOC100193171	putative protein kinase superfamily protein precursor [Zea mays]
gene-LOC100193172	aldo-keto reductase/ oxidoreductase [Zea mays]
gene-LOC100193173	Putative metacaspase family protein [Zea mays]
gene-LOC100193174	chaperonin [Zea mays]
gene-LOC100193175	hypothetical protein [Zea mays]
gene-LOC100193178	uncharacterized protein LOC100193178 isoform X1 [Zea mays]
gene-LOC100193179	uncharacterized protein LOC100193179 [Zea mays]
gene-LOC100193180	uncharacterized LOC100193180 isoform X1 [Zea mays]
gene-LOC100193182	uncharacterized protein LOC100193182 [Zea mays]
gene-LOC100193183	uncharacterized protein LOC100193183 [Zea mays]
gene-LOC100193184	nitrate-induced NOI protein [Zea mays]
gene-LOC100193185	putative glycogen synthase kinase family protein [Zea mays]
gene-LOC100193186	LUC7 N_terminus domain-containing protein [Zea mays]
gene-LOC100193187	hypothetical protein [Zea mays]
gene-LOC100193188	uncharacterized protein LOC100193188 [Zea mays]
gene-LOC100193189	uncharacterized protein LOC100193189 isoform X1 [Zea mays]
gene-LOC100193190	uncharacterized protein LOC100193190 isoform X1 [Zea mays]
gene-LOC100193191	uncharacterized protein LOC100193191 [Zea mays]
gene-LOC100193193	Lipid phosphate phosphatase 2 [Zea mays]
gene-LOC100193194	putative thaumatin domain family protein isoform X1 [Zea mays]
gene-LOC100193195	uncharacterized protein LOC100193195 [Zea mays]
gene-LOC100193196	putative MYB DNA-binding domain superfamily protein [Zea mays]
gene-LOC100193197	uncharacterized protein LOC100193197 isoform X1 [Zea mays]
gene-LOC100193199	putative CRINKLY4-like receptor protein kinase family protein [Zea mays]
gene-LOC100193200	uncharacterized protein LOC100193200 isoform X1 [Zea mays]
gene-LOC100193201	RNA-binding (RRM/RBD/RNP motifs) family protein, partial [Zea mays]
gene-LOC100193205	RNA-binding (RRM/RBD/RNP motifs) family protein isoform 1 [Zea mays]
gene-LOC100193206	uncharacterized LOC100193206 [Zea mays]
gene-LOC100193207	uncharacterized protein LOC100193207 [Zea mays]
gene-LOC100193208	uncharacterized protein LOC100193208 [Zea mays]
gene-LOC100193209	uncharacterized protein LOC100193209 [Zea mays]
gene-LOC100193210	ATARP7 [Zea mays]
gene-LOC100193211	uncharacterized LOC100193211 [Zea mays]
gene-LOC100193212	uncharacterized protein LOC100193212 [Zea mays]
gene-LOC100193214	uncharacterized protein LOC100193214 [Zea mays]
gene-LOC100193215	HVA22-like protein c isoform X1 [Zea mays]
gene-LOC100193216	E3 ubiquitin-protein ligase SPL2 [Zea mays]
gene-LOC100193217	uncharacterized protein LOC100193217 [Zea mays]
gene-LOC100193219	uncharacterized LOC100193219 [Zea mays]
gene-LOC100193220	uncharacterized protein LOC100193220 isoform X1 [Zea mays]
gene-LOC100193223	uncharacterized LOC100193223 precursor [Zea mays]
gene-LOC100193224	uncharacterized protein LOC100193224 [Zea mays]
gene-LOC100193226	uncharacterized protein LOC100193226 [Zea mays]
gene-LOC100193227	uncharacterized protein LOC100193227 [Zea mays]
gene-LOC100193229	peroxisome assembly factor 1 [Zea mays]
gene-LOC100193230	uncharacterized protein LOC100193230 [Zea mays]
gene-LOC100193231	putative RING zinc finger domain superfamily protein [Zea mays]
gene-LOC100193232	putative protein kinase superfamily protein [Zea mays]
gene-LOC100193234	uncharacterized protein LOC100193234 [Zea mays]
gene-LOC100193235	Putative chaperone clbp family protein [Zea mays]
gene-LOC100193236	uncharacterized protein LOC100193236 [Zea mays]
gene-LOC100193237	uncharacterized protein LOC100193237 isoform X1 [Zea mays]
gene-LOC100193239	uncharacterized protein LOC100193239 [Zea mays]
gene-LOC100193240	40S ribosomal protein S5 [Zea mays]
gene-LOC100193242	mitochondrial carrier protein CoAc1 [Zea mays]
gene-LOC100193243	uncharacterized protein LOC100193243 [Zea mays]
gene-LOC100193244	uncharacterized protein LOC100193244 [Zea mays]
gene-LOC100193245	uncharacterized protein LOC100193245 isoform X1 [Zea mays]
gene-LOC100193247	unknown [Zea mays]
gene-LOC100193248	uncharacterized protein LOC100193248 [Zea mays]
gene-LOC100193249	uncharacterized protein LOC100193249 [Zea mays]
gene-LOC100193250	uncharacterized protein LOC100193250 [Zea mays]
gene-LOC100193251	uncharacterized protein LOC100193251 [Zea mays]
gene-LOC100193252	uncharacterized protein LOC100193252 [Zea mays]
gene-LOC100193253	ATP phosphoribosyltransferase 2 chloroplastic [Zea mays]
gene-LOC100193254	translocon-associated protein homolog 1 isoform X1 [Zea mays]
gene-LOC100193255	uncharacterized protein LOC100193255 [Zea mays]
gene-LOC100193256	putative subtilase family protein precursor [Zea mays]
gene-LOC100193257	uncharacterized protein LOC100193257 [Zea mays]
gene-LOC100193258	60S ribosomal protein L27 [Zea mays]
gene-LOC100193259	MATH domain containing protein isoform 1 [Zea mays]
gene-LOC100193260	GTP-binding nuclear protein Ran-2 [Zea mays]
gene-LOC100193261	uncharacterized protein LOC100502300 isoform X2 [Zea mays]
gene-LOC100193262	40S ribosomal protein S26-3 [Triticum urartu]
gene-LOC100193263	40S ribosomal protein S26-3 [Triticum urartu]
gene-LOC100193265	uncharacterized protein LOC100193265 [Zea mays]
gene-LOC100193266	uncharacterized protein LOC100193266 [Zea mays]
gene-LOC100193267	uncharacterized protein LOC100193267 [Zea mays]
gene-LOC100193269	40S ribosomal protein S7 [Zea mays]
gene-LOC100193271	uncharacterized LOC100193271 isoform X1 [Zea mays]
gene-LOC100193272	uncharacterized protein LOC100193272 [Zea mays]
gene-LOC100193273	Ribonucleoside-diphosphate reductase small chain [Zea mays]
gene-LOC100193275	pentatricopeptide repeat-containing protein At5g39710 isoform X2 [Zea mays]
gene-LOC100193276	uncharacterized LOC100193276 [Zea mays]
gene-LOC100193277	Type IV inositol polyphosphate 5-phosphatase 7 [Zea mays]
gene-LOC100193278	uncharacterized protein LOC100193278 [Zea mays]
gene-LOC100193279	uncharacterized protein LOC100193279 [Zea mays]
gene-LOC100193283	putative RNA recognition motif containing family protein [Zea mays]
gene-LOC100193284	pollen-specific protein SF21 [Zea mays]
gene-LOC100193285	CASP-like protein 2D1 [Zea mays]
gene-LOC100193286	uncharacterized protein LOC100193286 [Zea mays]
gene-LOC100193288	uncharacterized protein LOC100193288 [Zea mays]
gene-LOC100193289	uncharacterized protein LOC100193289 isoform X1 [Zea mays]
gene-LOC100193290	alpha-expansin 13 precursor [Zea mays]
gene-LOC100193292	uncharacterized protein LOC100193292 isoform X1 [Zea mays]
gene-LOC100193293	transaminase/ transferase [Zea mays]
gene-LOC100193296	putative mini-chromosome maintenance (MCM) complex protein family [Zea mays]
gene-LOC100193297	uncharacterized protein LOC100193297 precursor [Zea mays]
gene-LOC100193298	uncharacterized protein LOC100193298 [Zea mays]
gene-LOC100193299	ML domain protein precursor [Zea mays]
gene-LOC100193300	uncharacterized protein LOC100193300 [Zea mays]
gene-LOC100193301	AP2-EREBP transcription factor, partial [Zea mays]
gene-LOC100193302	uncharacterized LOC100193302 precursor [Zea mays]
gene-LOC100193303	Indole-3-acetic acid-amido synthetase GH3.6 [Zea mays]
gene-LOC100193305	transcription repressor TRM protein [Zea mays]
gene-LOC100193306	putative MYB DNA-binding domain superfamily protein isoform X1 [Zea mays]
gene-LOC100193309	unknown [Zea mays]
gene-LOC100193310	uncharacterized LOC100193310 isoform 2 [Zea mays]
gene-LOC100193311	UDP-glucuronate:xylan alpha-glucuronosyltransferase 1 [Zea mays]
gene-LOC100193312	uncharacterized protein LOC100193312 [Zea mays]
gene-LOC100193314	chloroplast-localized Ptr ToxA-binding protein 1 [Zea mays]
gene-LOC100193315	uncharacterized protein LOC100193315 isoform X1 [Zea mays]
gene-LOC100193316	uncharacterized protein LOC100193316 [Zea mays]
gene-LOC100193317	cycloartenol synthase [Zea mays]
gene-LOC100193318	uncharacterized protein LOC100193318 [Zea mays]
gene-LOC100193319	uncharacterized protein LOC100193319 [Zea mays]
gene-LOC100193320	uncharacterized LOC100193320 isoform X1 [Zea mays]
gene-LOC100193321	RNA recognition motif-containing protein [Zea mays]
gene-LOC100193322	uncharacterized protein LOC100193322 [Zea mays]
gene-LOC100193323	uncharacterized protein LOC100193323 [Zea mays]
gene-LOC100193324	uncharacterized protein LOC100193324 [Zea mays]
gene-LOC100193325	plastid initiation factor 3 [Zea mays]
gene-LOC100193327	uncharacterized LOC100193327 [Zea mays]
gene-LOC100193329	uncharacterized protein LOC100193329 [Zea mays]
gene-LOC100193330	uncharacterized LOC100193330 [Zea mays]
gene-LOC100193331	putative cytochrome P450 superfamily protein precursor [Zea mays]
gene-LOC100193332	uncharacterized protein LOC100193332 [Zea mays]
gene-LOC100193333	uncharacterized LOC100193333 [Zea mays]
gene-LOC100193334	uncharacterized protein LOC100193334 [Zea mays]
gene-LOC100193335	Ras protein Rab11A [Zea mays]
gene-LOC100193337	Syntaxin-51 [Zea mays]
gene-LOC100193338	uncharacterized protein 100193338 isoform 3 [Zea mays]
gene-LOC100193339	RNA-binding (RRM/RBD/RNP motifs) family protein [Zea mays]
gene-LOC100193340	Pyrophosphate--fructose 6-phosphate 1-phosphotransferase subunit alpha 2 [Zea mays]
gene-LOC100193341	uncharacterized protein LOC100193341 [Zea mays]
gene-LOC100193342	uncharacterized protein LOC100193342 precursor [Zea mays]
gene-LOC100193343	uncharacterized protein LOC100193343 [Zea mays]
gene-LOC100193344	uncharacterized protein LOC100193344 [Zea mays]
gene-LOC100193348	prolyl 4-hydroxylase 1 [Zea mays]
gene-LOC100193349	uncharacterized protein LOC100193349 [Zea mays]
gene-LOC100193350	WAT1-related protein [Zea mays]
gene-LOC100193352	3-ketodihydrosphingosine reductase precursor [Zea mays]
gene-LOC100193354	uncharacterized protein LOC103638077 [Zea mays]
gene-LOC100193357	uncharacterized LOC100193357 [Zea mays]
gene-LOC100193358	unknown [Zea mays]
gene-LOC100193359	uncharacterized LOC100193359 isoform X1 [Zea mays]
gene-LOC100193360	unknown [Zea mays]
gene-LOC100193361	uncharacterized protein LOC100193361 [Zea mays]
gene-LOC100193362	acyl-CoA-binding protein [Zea mays]
gene-LOC100193364	26S protease regulatory subunit 4 homolog [Zea mays]
gene-LOC100193366	uncharacterized protein LOC100193366 [Zea mays]
gene-LOC100193367	uncharacterized protein LOC100193367 [Zea mays]
gene-LOC100193368	COV1-like protein [Zea mays]
gene-LOC100193369	uncharacterized protein LOC100193369 [Zea mays]
gene-LOC100193370	uncharacterized protein LOC100193370 isoform X1 [Zea mays]
gene-LOC100193371	hypothetical protein [Zea mays]
gene-LOC100193372	uncharacterized protein LOC100193372 [Zea mays]
gene-LOC100193373	uncharacterized protein LOC100193373 isoform X1 [Zea mays]
gene-LOC100193374	Splicing factor, arginine/serine-rich 2 [Zea mays]
gene-LOC100193375	uncharacterized protein LOC100193375 [Zea mays]
gene-LOC100193376	uncharacterized protein LOC100193376 [Zea mays]
gene-LOC100193377	purine permease 3 isoform X1 [Zea mays]
gene-LOC100193378	uncharacterized protein LOC100193378 [Zea mays]
gene-LOC100193379	uncharacterized protein LOC100193379 [Zea mays]
gene-LOC100193380	putative AP2/EREBP transcription factor superfamily protein [Zea mays]
gene-LOC100193381	uncharacterized protein LOC100193381 [Zea mays]
gene-LOC100193382	uncharacterized LOC100193382 [Zea mays]
gene-LOC100193383	uncharacterized protein LOC100193383 [Zea mays]
gene-LOC100193384	uncharacterized protein LOC100193384 [Zea mays]
gene-LOC100193385	uncharacterized protein LOC100193385 isoform X1 [Zea mays]
gene-LOC100193386	uncharacterized protein LOC100193386 [Zea mays]
gene-LOC100193387	protein Z [Zea mays]
gene-LOC100193388	uncharacterized protein LOC100193388 [Zea mays]
gene-LOC100193389	uncharacterized protein LOC100193389 [Zea mays]
gene-LOC100193390	uncharacterized LOC100193390 isoform X1 [Zea mays]
gene-LOC100193393	uncharacterized protein LOC100193393 [Zea mays]
gene-LOC100193394	uncharacterized protein LOC100193394 [Zea mays]
gene-LOC100193395	uncharacterized protein LOC100193395 [Zea mays]
gene-LOC100193397	unknown [Zea mays]
gene-LOC100193398	superoxide dismutase [Mn]
gene-LOC100193399	ALFIN-like transcription factor [Zea mays]
gene-LOC100193400	uncharacterized protein LOC100193400 [Zea mays]
gene-LOC100193401	14-3-3-like protein [Zea mays]
gene-LOC100193403	uncharacterized protein LOC100193403 [Zea mays]
gene-LOC100193404	uncharacterized LOC100193404 [Zea mays]
gene-LOC100193405	uncharacterized protein LOC100193405 [Zea mays]
gene-LOC100193407	uncharacterized protein LOC100193407 [Zea mays]
gene-LOC100193408	uncharacterized protein LO isoform 1 [Zea mays]
gene-LOC100193409	uncharacterized protein LOC100193409 isoform X1 [Zea mays]
gene-LOC100193410	uncharacterized protein LOC100193410 precursor [Zea mays]
gene-LOC100193411	Zinc finger CCCH domain-containing protein 52 [Zea mays]
gene-LOC100193412	uncharacterized protein LOC100193412 [Zea mays]
gene-LOC100193413	uncharacterized protein LOC100193413 [Zea mays]
gene-LOC100193414	uncharacterized protein LOC100193414 [Zea mays]
gene-LOC100193415	uncharacterized protein LOC100193415 [Zea mays]
gene-LOC100193417	uncharacterized protein LOC100193417 [Zea mays]
gene-LOC100193418	unknown [Zea mays]
gene-LOC100193419	vesicle-associated membrane protein 712 [Zea mays]
gene-LOC100193420	palmitoyl-protein thioesterase 1 precursor [Zea mays]
gene-LOC100193421	uncharacterized LOC100193421 isoform X1 [Zea mays]
gene-LOC100193422	uncharacterized protein LOC100193422 [Zea mays]
gene-LOC100193423	uncharacterized protein LOC100193423 isoform X1 [Zea mays]
gene-LOC100193424	nicotianamine aminotransferase 1 [Zea mays]
gene-LOC100193425	thyroid receptor-interacting protein 13 [Zea mays]
gene-LOC100193426	RING/FYVE/PHD zinc finger superfamily protein [Zea mays]
gene-LOC100193428	Heat stress transcription factor A-8 [Zea mays]
gene-LOC100193429	uncharacterized LOC100193429 precursor [Zea mays]
gene-LOC100193430	uncharacterized protein LOC100193430 isoform X1 [Zea mays]
gene-LOC100193433	fructose-bisphosphate aldolase-lysine N-methyltransferase, chloroplastic [Sorghum bicolor]
gene-LOC100193434	uncharacterized protein LOC100193434 [Zea mays]
gene-LOC100193435	Alliin lyase [Zea mays]
gene-LOC100193436	uncharacterized protein LOC100193436 precursor [Zea mays]
gene-LOC100193437	uncharacterized protein LOC100193437 [Zea mays]
gene-LOC100193440	Got1/Sft2-like vescicle transport protein family [Zea mays]
gene-LOC100193441	uncharacterized LOC100193441 [Zea mays]
gene-LOC100193442	putative YABBY domain transcription factor family protein [Zea mays]
gene-LOC100193443	Calcineurin subunit B [Zea mays]
gene-LOC100193444	IAA15-auxin-responsive Aux/IAA family member [Zea mays]
gene-LOC100193445	uncharacterized protein LOC100193445 [Zea mays]
gene-LOC100193447	uncharacterized protein LOC100193447 [Zea mays]
gene-LOC100193449	vacuolar protein sorting 26 [Zea mays]
gene-LOC100193450	uncharacterized protein LOC100193450 [Zea mays]
gene-LOC100193451	uncharacterized protein LOC100193451 precursor [Zea mays]
gene-LOC100193452	uncharacterized protein LOC100193452 [Zea mays]
gene-LOC100193453	uncharacterized protein LOC100193453 [Zea mays]
gene-LOC100193454	uncharacterized protein LOC100193454 [Zea mays]
gene-LOC100193455	nuclear-pore anchor isoform X1 [Zea mays]
gene-LOC100193457	uncharacterized protein LOC100193457 isoform X1 [Zea mays]
gene-LOC100193458	p21-activated protein kinase-interacting protein 1-like [Zea mays]
gene-LOC100193460	uncharacterized protein LOC100193460 [Zea mays]
gene-LOC100193461	putative thaumatin domain family protein isoform X1 [Zea mays]
gene-LOC100193462	uncharacterized protein LOC100193462 [Zea mays]
gene-LOC100193463	uncharacterized protein LOC100193463 [Zea mays]
gene-LOC100193464	uncharacterized LOC100193464 [Zea mays]
gene-LOC100193465	uncharacterized protein LOC100193465 [Zea mays]
gene-LOC100193466	uncharacterized protein LOC100193466 [Zea mays]
gene-LOC100193467	Carbamoyl-phosphate synthase small chain [Zea mays]
gene-LOC100193468	uncharacterized protein LOC100193468 [Zea mays]
gene-LOC100193469	Spc97 / Spc98 family of spindle pole body (SBP) component [Zea mays]
gene-LOC100193471	uncharacterized protein LOC100193471 isoform X1 [Zea mays]
gene-LOC100193472	putative cytochrome P450 superfamily protein [Zea mays]
gene-LOC100193473	Serine carboxypeptidase-like 40 [Zea mays]
[truncated: 34,606 more rows]

## Sheet: Tables3
Table S3 Unigenes GO databases annotation of sweet corn after application of B. subtilis R31.
ID	Annotation
gene-100272838	GO:0009507,chloroplast; GO:0080158,NA
gene-an1	GO:0009507,chloroplast; GO:0009905,ent-copalyl diphosphate synthase activity; GO:0000287,magnesium ion binding; GO:0010333,terpene synthase activity; GO:0009686,gibberellin biosynthetic process; GO:0009685,gibberellin metabolic process
gene-an2	GO:0009507,chloroplast; GO:0009905,ent-copalyl diphosphate synthase activity; GO:0000287,magnesium ion binding; GO:0010333,terpene synthase activity; GO:0009686,gibberellin biosynthetic process; GO:0009685,gibberellin metabolic process
gene-aoc1	GO:0009507,chloroplast; GO:0046423,allene-oxide cyclase activity; GO:0009734,auxin-activated signaling pathway; GO:0007623,circadian rhythm; GO:0050832,defense response to fungus; GO:0080186,developmental vegetative growth; GO:0009908,flower development; GO:0009864,induced systemic resistance, jasmonic acid mediated signaling pathway; GO:0009695,jasmonic acid biosynthetic process; GO:0048573,phot…
gene-aoc2	GO:0009507,chloroplast; GO:0046423,allene-oxide cyclase activity; GO:0009734,auxin-activated signaling pathway; GO:0007623,circadian rhythm; GO:0050832,defense response to fungus; GO:0080186,developmental vegetative growth; GO:0009908,flower development; GO:0009864,induced systemic resistance, jasmonic acid mediated signaling pathway; GO:0009695,jasmonic acid biosynthetic process; GO:0048573,phot…
gene-aos1	GO:0020037,heme binding; GO:0047987,hydroperoxide dehydratase activity; GO:0005506,iron ion binding; GO:0004497,monooxygenase activity; GO:0016705,oxidoreductase activity, acting on paired donors, with incorporation or reduction of molecular oxygen; GO:0031408,oxylipin biosynthetic process; GO:0016125,sterol metabolic process
gene-aos2	GO:0020037,heme binding; GO:0047987,hydroperoxide dehydratase activity; GO:0005506,iron ion binding; GO:0004497,monooxygenase activity; GO:0016705,oxidoreductase activity, acting on paired donors, with incorporation or reduction of molecular oxygen; GO:0031408,oxylipin biosynthetic process; GO:0016125,sterol metabolic process
gene-aos3	GO:0031969,chloroplast membrane; GO:0009535,chloroplast thylakoid membrane; GO:0005739,mitochondrion; GO:0010287,plastoglobule; GO:0009978,allene oxide synthase activity; GO:0020037,heme binding; GO:0047987,hydroperoxide dehydratase activity; GO:0005506,iron ion binding; GO:0004497,monooxygenase activity; GO:0016705,oxidoreductase activity, acting on paired donors, with incorporation or reduction…
gene-aos4	GO:0031969,chloroplast membrane; GO:0009535,chloroplast thylakoid membrane; GO:0005739,mitochondrion; GO:0010287,plastoglobule; GO:0009978,allene oxide synthase activity; GO:0020037,heme binding; GO:0047987,hydroperoxide dehydratase activity; GO:0005506,iron ion binding; GO:0004497,monooxygenase activity; GO:0016705,oxidoreductase activity, acting on paired donors, with incorporation or reduction…
gene-BA1	GO:0005634,nucleus; GO:0003677,DNA binding; GO:0046983,protein dimerization activity; GO:0007275,multicellular organism development; GO:0045893,positive regulation of transcription, DNA-templated; GO:2000032,regulation of secondary shoot formation; GO:0006351,transcription, DNA-templated
gene-bk4	GO:0048046,apoplast; GO:0005794,Golgi apparatus; GO:0030247,polysaccharide binding; GO:0016998,cell wall macromolecule catabolic process; GO:0030244,cellulose biosynthetic process; GO:0006032,chitin catabolic process; GO:0009873,ethylene-activated signaling pathway; GO:0009825,multidimensional cell growth; GO:0010337,regulation of salicylic acid metabolic process; GO:0009735,response to cytokinin…
gene-bz15	GO:0033095,aleurone grain; GO:0005773,vacuole; GO:0045735,nutrient reservoir activity
gene-bZIP45	GO:0003700,DNA-binding transcription factor activity
gene-csu861	GO:0005576,extracellular region; GO:0016788,hydrolase activity, acting on ester bonds; GO:0042538,hyperosmotic salinity response; GO:0016042,lipid catabolic process; GO:0010226,response to lithium ion; GO:0009751,response to salicylic acid
gene-ct2	GO:0005789,endoplasmic reticulum membrane; GO:0005834,heterotrimeric G-protein complex; GO:0005886,plasma membrane; GO:0009506,plasmodesma; GO:0016247,channel regulator activity; GO:0031683,G-protein beta/gamma-subunit complex binding; GO:0001664,G protein-coupled receptor binding; GO:0005525,GTP binding; GO:0003924,GTPase activity; GO:0005095,GTPase inhibitor activity; GO:0046872,metal ion bindi…
gene-CYP92C6	GO:0005789,endoplasmic reticulum membrane; GO:0016021,integral component of membrane; GO:0016020,membrane; GO:0016711,flavonoid 3'-monooxygenase activity; GO:0020037,heme binding; GO:0005506,iron ion binding; GO:0009813,flavonoid biosynthetic process; GO:0009733,response to auxin; GO:0044550,secondary metabolite biosynthetic process
gene-dhar1	GO:0005737,cytoplasm; GO:0005829,cytosol; GO:0045174,glutathione dehydrogenase (ascorbate) activity; GO:0004364,glutathione transferase activity; GO:0033355,ascorbate glutathione cycle; GO:0098869,cellular oxidant detoxification; GO:0006749,glutathione metabolic process
gene-dhar2	GO:0005737,cytoplasm; GO:0005829,cytosol; GO:0045174,glutathione dehydrogenase (ascorbate) activity; GO:0004364,glutathione transferase activity; GO:0033355,ascorbate glutathione cycle; GO:0098869,cellular oxidant detoxification; GO:0006749,glutathione metabolic process
gene-dhar3	GO:0005737,cytoplasm; GO:0005829,cytosol; GO:0045174,glutathione dehydrogenase (ascorbate) activity; GO:0004364,glutathione transferase activity; GO:0033355,ascorbate glutathione cycle; GO:0098869,cellular oxidant detoxification; GO:0006749,glutathione metabolic process
gene-dhar4	GO:0009507,chloroplast; GO:0005737,cytoplasm; GO:0045174,glutathione dehydrogenase (ascorbate) activity; GO:0004364,glutathione transferase activity; GO:0006749,glutathione metabolic process
gene-dsy2	GO:0005694,chromosome; GO:0005634,nucleus; GO:0007129,synapsis
gene-Dwarf1	GO:0016707,gibberellin 3-beta-dioxygenase activity; GO:0046872,metal ion binding
gene-fea3	GO:0009507,chloroplast; GO:0005886,plasma membrane; GO:0009610,response to symbiotic fungus; GO:0044403,symbiont process
gene-FEA4	GO:0005634,nucleus; GO:0003700,DNA-binding transcription factor activity; GO:0043565,sequence-specific DNA binding; GO:0006952,defense response; GO:0006351,transcription, DNA-templated
gene-ga3ox2	GO:0016707,gibberellin 3-beta-dioxygenase activity; GO:0046872,metal ion binding
gene-gpm300	GO:0005737,cytoplasm; GO:0005634,nucleus; GO:0005524,ATP binding; GO:0004674,protein serine/threonine kinase activity; GO:0009738,abscisic acid-activated signaling pathway; GO:0042742,defense response to bacterium; GO:0035556,intracellular signal transduction; GO:0006468,protein phosphorylation
gene-gpm925	GO:0005634,nucleus; GO:0003714,transcription corepressor activity; GO:1903507,negative regulation of nucleic acid-templated transcription; GO:0031347,regulation of defense response; GO:2000022,regulation of jasmonic acid mediated signaling pathway; GO:0006355,regulation of transcription, DNA-templated; GO:0009611,response to wounding; GO:0006351,transcription, DNA-templated
gene-GRF1	GO:0005634,nucleus; GO:0005524,ATP binding; GO:0032502,developmental process; GO:0006355,regulation of transcription, DNA-templated; GO:0006351,transcription, DNA-templated
gene-GRMZM2G028813	GO:0005737,cytoplasm; GO:0005874,microtubule; GO:0005634,nucleus; GO:0005516,calmodulin binding; GO:0008017,microtubule binding
gene-gz16	GO:0033095,aleurone grain; GO:0005773,vacuole; GO:0045735,nutrient reservoir activity
gene-gz27	GO:0032578,aleurone grain membrane; GO:0005773,vacuole; GO:0045735,nutrient reservoir activity
gene-gz50	GO:0031225,anchored component of membrane; GO:0005886,plasma membrane; GO:0045735,nutrient reservoir activity
gene-HDA108	GO:0009941,chloroplast envelope; GO:0005730,nucleolus; GO:0005634,nucleus; GO:0004407,histone deacetylase activity; GO:0032041,NAD-dependent histone deacetylase activity (H3-K14 specific); GO:0009793,embryo development ending in seed dormancy; GO:0016458,gene silencing; GO:0016575,histone deacetylation; GO:0016441,posttranscriptional gene silencing; GO:0006355,regulation of transcription, DNA-tem…
gene-IDP351	GO:0005737,cytoplasm; GO:0005635,nuclear envelope; GO:0005643,nuclear pore; GO:0017056,structural constituent of nuclear pore; GO:0051028,mRNA transport; GO:1904263,positive regulation of TORC1 signaling; GO:0015031,protein transport
gene-IDP755	GO:0003676,nucleic acid binding
gene-IDP798	GO:0005737,cytoplasm; GO:0005847,mRNA cleavage and polyadenylation specificity factor complex; GO:0009506,plasmodesma; GO:0003723,RNA binding; GO:0006379,mRNA cleavage; GO:0006378,mRNA polyadenylation; GO:0035194,posttranscriptional gene silencing by RNA
gene-IPT4	GO:0009507,chloroplast; GO:0005739,mitochondrion; GO:0031965,nuclear membrane; GO:0005634,nucleus; GO:0009536,plastid; GO:0052623,ADP dimethylallyltransferase activity; GO:0009824,AMP dimethylallyltransferase activity; GO:0005524,ATP binding; GO:0052622,ATP dimethylallyltransferase activity; GO:0052381,tRNA dimethylallyltransferase activity; GO:0009691,cytokinin biosynthetic process; GO:0006400,t…
gene-KSL4	GO:0034282,ent-pimara-8(14),15-diene synthase activity; GO:0000287,magnesium ion binding; GO:0010333,terpene synthase activity; GO:0006952,defense response; GO:0008152,metabolic process
gene-LOC100037740	GO:0005634,nucleus; GO:0003677,DNA binding; GO:0006355,regulation of transcription, DNA-templated; GO:0006351,transcription, DNA-templated
gene-LOC100037746	GO:0005634,nucleus; GO:0003700,DNA-binding transcription factor activity; GO:0000981,DNA-binding transcription factor activity, RNA polymerase II-specific; GO:0043565,sequence-specific DNA binding; GO:0001135,RNA polymerase II transcription regulator recruiting activity; GO:0044212,transcription regulatory region DNA binding; GO:0030154,cell differentiation; GO:0006952,defense response; GO:000635…
gene-LOC100037748	GO:0005737,cytoplasm; GO:0005622,intracellular; GO:0005525,GTP binding; GO:0003924,GTPase activity; GO:0003746,translation elongation factor activity
gene-LOC100037751	GO:0005737,cytoplasm; GO:0005874,microtubule; GO:0005525,GTP binding; GO:0003924,GTPase activity; GO:0005200,structural constituent of cytoskeleton; GO:0007017,microtubule-based process
gene-LOC100037755	GO:0005634,nucleus; GO:0003677,DNA binding; GO:0006355,regulation of transcription, DNA-templated; GO:0006351,transcription, DNA-templated
gene-LOC100037760	GO:0016021,integral component of membrane; GO:0000325,plant-type vacuole; GO:0005774,vacuolar membrane; GO:0005524,ATP binding; GO:0042626,ATPase activity, coupled to transmembrane movement of substances; GO:0008559,xenobiotic transmembrane transporting ATPase activity; GO:0055085,transmembrane transport
gene-LOC100037763	GO:0005789,endoplasmic reticulum membrane; GO:0016021,integral component of membrane
gene-LOC100037764	GO:0005634,nucleus; GO:0003700,DNA-binding transcription factor activity; GO:0046983,protein dimerization activity; GO:0000977,RNA polymerase II regulatory region sequence-specific DNA binding; GO:0030154,cell differentiation; GO:0045944,positive regulation of transcription by RNA polymerase II; GO:0010097,specification of stamen identity; GO:0006351,transcription, DNA-templated
gene-LOC100037765	GO:0005615,extracellular space; GO:0042973,glucan endo-1,3-beta-D-glucosidase activity; GO:0005975,carbohydrate metabolic process; GO:0006952,defense response
gene-LOC100037767	GO:0005576,extracellular region; GO:0004869,cysteine-type endopeptidase inhibitor activity; GO:0002020,protease binding; GO:0006952,defense response; GO:2000117,negative regulation of cysteine-type endopeptidase activity
gene-LOC100037768	GO:0005634,nucleus; GO:0003677,DNA binding; GO:0006355,regulation of transcription, DNA-templated; GO:0006351,transcription, DNA-templated
gene-LOC100037774	GO:0005737,cytoplasm; GO:0043234,NA; GO:0004365,glyceraldehyde-3-phosphate dehydrogenase (NAD+) (phosphorylating) activity; GO:0070403,NAD+ binding; GO:0050661,NADP binding; GO:0042301,phosphate ion binding; GO:0006006,glucose metabolic process; GO:0006096,glycolytic process; GO:0034059,response to anoxia; GO:0009408,response to heat
gene-LOC100037775	GO:0005829,cytosol; GO:0003989,acetyl-CoA carboxylase activity; GO:0005524,ATP binding; GO:0004075,biotin carboxylase activity; GO:0046872,metal ion binding; GO:0006633,fatty acid biosynthetic process; GO:2001295,malonyl-CoA biosynthetic process
gene-LOC100037776	GO:0031969,chloroplast membrane; GO:0016021,integral component of membrane; GO:0015121,phosphoenolpyruvate:phosphate antiporter activity; GO:0009670,triose-phosphate:phosphate antiporter activity; GO:0008643,carbohydrate transport; GO:0015714,phosphoenolpyruvate transport; GO:0035436,triose phosphate transmembrane transport
gene-LOC100037778	GO:0005737,cytoplasm
gene-LOC100037781	GO:0048046,apoplast; GO:0005615,extracellular space; GO:0033612,receptor serine/threonine kinase binding; GO:0045168,cell-cell signaling involved in cell fate commitment; GO:0007275,multicellular organism development
gene-LOC100037782	GO:0005736,RNA polymerase I complex; GO:0000418,RNA polymerase IV complex; GO:0000419,RNA polymerase V complex; GO:0005720,nuclear heterochromatin; GO:0005634,nucleus; GO:0003677,DNA binding; GO:0003899,DNA-directed 5'-3' RNA polymerase activity; GO:0046872,metal ion binding; GO:0032549,ribonucleoside binding; GO:0050832,defense response to fungus; GO:0006306,DNA methylation; GO:0031047,gene sile…
gene-LOC100037783	GO:0005886,plasma membrane; GO:0005524,ATP binding; GO:0004675,transmembrane receptor protein serine/threonine kinase activity; GO:0007166,cell surface receptor signaling pathway; GO:0009626,plant-type hypersensitive response; GO:0006468,protein phosphorylation
gene-LOC100037784	GO:0005886,plasma membrane; GO:0005524,ATP binding; GO:0004715,non-membrane spanning protein tyrosine kinase activity; GO:0019901,protein kinase binding; GO:0004675,transmembrane receptor protein serine/threonine kinase activity; GO:0007166,cell surface receptor signaling pathway; GO:0006468,protein phosphorylation
gene-LOC100037785	GO:0005737,cytoplasm
gene-LOC100037786	GO:0005634,nucleus; GO:0003677,DNA binding; GO:0007275,multicellular organism development; GO:0006355,regulation of transcription, DNA-templated; GO:0006351,transcription, DNA-templated
gene-LOC100037787	GO:0005634,nucleus; GO:0003677,DNA binding; GO:0007275,multicellular organism development; GO:0006355,regulation of transcription, DNA-templated; GO:0006351,transcription, DNA-templated
gene-LOC100037791	GO:0005634,nucleus; GO:0003677,DNA binding; GO:0003700,DNA-binding transcription factor activity; GO:0043621,protein self-association; GO:2000028,regulation of photoperiodism, flowering; GO:0010200,response to chitin; GO:0006351,transcription, DNA-templated
gene-LOC100037792	GO:0009507,chloroplast; GO:0005886,plasma membrane; GO:0046872,metal ion binding; GO:0008251,tRNA-specific adenosine deaminase activity; GO:0002100,tRNA wobble adenosine to inosine editing
gene-LOC100037793	GO:0009507,chloroplast; GO:0005886,plasma membrane; GO:0046872,metal ion binding; GO:0008251,tRNA-specific adenosine deaminase activity; GO:0002100,tRNA wobble adenosine to inosine editing
gene-LOC100037794	GO:0016021,integral component of membrane; GO:0005886,plasma membrane; GO:0005509,calcium ion binding; GO:0050664,oxidoreductase activity, acting on NAD(P)H, oxygen as acceptor; GO:0004601,peroxidase activity
gene-LOC100037796	GO:0005737,cytoplasm; GO:0005634,nucleus; GO:0005524,ATP binding; GO:0004674,protein serine/threonine kinase activity; GO:0035556,intracellular signal transduction; GO:0006468,protein phosphorylation
gene-LOC100037797	GO:0005737,cytoplasm; GO:0004512,inositol-3-phosphate synthase activity; GO:0006021,inositol biosynthetic process; GO:0008654,phospholipid biosynthetic process
gene-LOC100037798	GO:0031225,anchored component of membrane; GO:0016021,integral component of membrane; GO:0005886,plasma membrane; GO:0016049,cell growth; GO:0010215,cellulose microfibril organization
gene-LOC100037799	GO:0031225,anchored component of membrane; GO:0005886,plasma membrane; GO:0016049,cell growth; GO:0010215,cellulose microfibril organization
gene-LOC100037800	GO:0031225,anchored component of membrane; GO:0005886,plasma membrane; GO:0016049,cell growth; GO:0010215,cellulose microfibril organization
gene-LOC100037801	GO:0031225,anchored component of membrane; GO:0046658,anchored component of plasma membrane; GO:0005768,endosome; GO:0005794,Golgi apparatus; GO:0009506,plasmodesma; GO:0005802,trans-Golgi network; GO:0016049,cell growth; GO:0010215,cellulose microfibril organization
gene-LOC100037812	GO:0005829,cytosol; GO:0005634,nucleus; GO:0016491,oxidoreductase activity
gene-LOC100037813	GO:0004867,serine-type endopeptidase inhibitor activity; GO:0006979,response to oxidative stress
gene-LOC100037814	GO:0005576,extracellular region; GO:0004867,serine-type endopeptidase inhibitor activity
gene-LOC100037815	GO:0005737,cytoplasm; GO:0005634,nucleus; GO:0019773,proteasome core complex, alpha-subunit complex; GO:0004298,threonine-type endopeptidase activity; GO:0006511,ubiquitin-dependent protein catabolic process
gene-LOC100037816	GO:0005634,nucleus; GO:0007275,multicellular organism development
gene-LOC100037818	GO:0005634,nucleus; GO:0008380,RNA splicing
gene-LOC100037819	GO:0031047,gene silencing by RNA; GO:0007275,multicellular organism development
gene-LOC100037820	GO:0016491,oxidoreductase activity
gene-LOC100037821	GO:0016020,membrane; GO:0050660,flavin adenine dinucleotide binding; GO:0103075,indole-3-pyruvate monooxygenase activity; GO:0004499,N,N-dimethylaniline monooxygenase activity; GO:0050661,NADP binding; GO:0009851,auxin biosynthetic process
gene-LOC100037822	GO:0016021,integral component of membrane; GO:0005886,plasma membrane; GO:0015743,malate transport
gene-LOC100037824	GO:0005615,extracellular space; GO:0005764,lysosome; GO:0004197,cysteine-type endopeptidase activity; GO:0051603,proteolysis involved in cellular protein catabolic process
gene-LOC100037826	GO:0005634,nucleus; GO:0003677,DNA binding; GO:0008289,lipid binding; GO:0006355,regulation of transcription, DNA-templated; GO:0006351,transcription, DNA-templated
gene-LOC100037828	GO:0031225,anchored component of membrane; GO:0005886,plasma membrane; GO:0016049,cell growth; GO:0010215,cellulose microfibril organization
gene-LOC100037830	GO:0005737,cytoplasm; GO:0005634,nucleus; GO:0004601,peroxidase activity; GO:0051920,peroxiredoxin activity; GO:0045454,cell redox homeostasis; GO:0050832,defense response to fungus
gene-LOC100038320	GO:0005634,nucleus; GO:0044212,transcription regulatory region DNA binding; GO:0010158,abaxial cell fate specification; GO:0010229,inflorescence development; GO:0006355,regulation of transcription, DNA-templated; GO:0006351,transcription, DNA-templated
gene-LOC100101505	GO:0005576,extracellular region; GO:0006952,defense response
gene-LOC100101510	GO:0005634,nucleus; GO:0003677,DNA binding; GO:0006355,regulation of transcription, DNA-templated; GO:0006351,transcription, DNA-templated
gene-LOC100101512	GO:0005634,nucleus; GO:0000981,DNA-binding transcription factor activity, RNA polymerase II-specific; GO:0043565,sequence-specific DNA binding; GO:0001135,RNA polymerase II transcription regulator recruiting activity; GO:0044212,transcription regulatory region DNA binding; GO:0030154,cell differentiation; GO:0006357,regulation of transcription by RNA polymerase II; GO:0006351,transcription, DNA-t…
gene-LOC100101513	GO:0005634,nucleus; GO:0003677,DNA binding; GO:0006355,regulation of transcription, DNA-templated; GO:0006351,transcription, DNA-templated
gene-LOC100101525	GO:0004869,cysteine-type endopeptidase inhibitor activity
gene-LOC100101526	GO:0009501,amyloplast; GO:0009507,chloroplast; GO:0033201,alpha-1,4-glucan synthase activity; GO:0004373,glycogen (starch) synthase activity; GO:0009011,starch synthase activity; GO:0019252,starch biosynthetic process
gene-LOC100101527	GO:0009501,amyloplast; GO:0009507,chloroplast; GO:0033201,alpha-1,4-glucan synthase activity; GO:0004373,glycogen (starch) synthase activity; GO:2001070,starch binding; GO:0009011,starch synthase activity; GO:0019252,starch biosynthetic process
gene-LOC100101528	GO:0009501,amyloplast; GO:0009507,chloroplast; GO:0033201,alpha-1,4-glucan synthase activity; GO:0004373,glycogen (starch) synthase activity; GO:2001070,starch binding; GO:0009011,starch synthase activity; GO:0019252,starch biosynthetic process
gene-LOC100101530	GO:0033186,CAF-1 complex; GO:0005634,nucleus; GO:0016569,covalent chromatin modification; GO:0006310,DNA recombination; GO:0006281,DNA repair; GO:0044772,mitotic cell cycle phase transition; GO:0006334,nucleosome assembly; GO:0010389,regulation of G2/M transition of mitotic cell cycle; GO:0006355,regulation of transcription, DNA-templated; GO:0010449,root meristem growth; GO:0006351,transcription…
gene-LOC100101531	GO:0009501,amyloplast; GO:0009507,chloroplast; GO:0005524,ATP binding; GO:0008878,glucose-1-phosphate adenylyltransferase activity; GO:0005978,glycogen biosynthetic process; GO:0019252,starch biosynthetic process
gene-LOC100101532	GO:0016021,integral component of membrane; GO:0005622,intracellular; GO:0005886,plasma membrane; GO:0005509,calcium ion binding; GO:0016174,NAD(P)H oxidase activity; GO:0004601,peroxidase activity; GO:0009738,abscisic acid-activated signaling pathway; GO:0033500,carbohydrate homeostasis; GO:0052542,defense response by callose deposition; GO:0009873,ethylene-activated signaling pathway; GO:0050665…
gene-LOC100101533	GO:0005576,extracellular region; GO:0020037,heme binding; GO:0046872,metal ion binding; GO:0004601,peroxidase activity; GO:0042744,hydrogen peroxide catabolic process; GO:0006979,response to oxidative stress
gene-LOC100101536	GO:0005634,nucleus; GO:0005524,ATP binding; GO:0032502,developmental process; GO:0006355,regulation of transcription, DNA-templated; GO:0006351,transcription, DNA-templated
gene-LOC100101537	GO:0005634,nucleus; GO:0005524,ATP binding; GO:0032502,developmental process; GO:0006355,regulation of transcription, DNA-templated; GO:0006351,transcription, DNA-templated
gene-LOC100101538	GO:0005634,nucleus; GO:0005524,ATP binding; GO:0032502,developmental process; GO:0006355,regulation of transcription, DNA-templated; GO:0006351,transcription, DNA-templated
gene-LOC100101539	GO:0005634,nucleus; GO:0005524,ATP binding; GO:0032502,developmental process; GO:0006355,regulation of transcription, DNA-templated; GO:0006351,transcription, DNA-templated
gene-LOC100101540	GO:0005634,nucleus; GO:0005524,ATP binding; GO:0032502,developmental process; GO:0006355,regulation of transcription, DNA-templated; GO:0006351,transcription, DNA-templated
gene-LOC100101542	GO:0005634,nucleus; GO:0005524,ATP binding; GO:0032502,developmental process; GO:0006355,regulation of transcription, DNA-templated; GO:0006351,transcription, DNA-templated
gene-LOC100101543	GO:0005634,nucleus; GO:0005524,ATP binding; GO:0032502,developmental process; GO:0006355,regulation of transcription, DNA-templated; GO:0006351,transcription, DNA-templated
gene-LOC100101544	GO:0003713,transcription coactivator activity; GO:0009955,adaxial/abaxial pattern specification; GO:0008283,cell proliferation; GO:0048366,leaf development; GO:0006355,regulation of transcription, DNA-templated; GO:0006351,transcription, DNA-templated
gene-LOC100101545	GO:0005634,nucleus; GO:0003713,transcription coactivator activity; GO:0008283,cell proliferation; GO:0048366,leaf development; GO:0006355,regulation of transcription, DNA-templated; GO:0006351,transcription, DNA-templated
gene-LOC100101546	GO:0005634,nucleus; GO:0003713,transcription coactivator activity; GO:0008283,cell proliferation; GO:0048366,leaf development; GO:0006355,regulation of transcription, DNA-templated; GO:0006351,transcription, DNA-templated
gene-LOC100101547	GO:0031969,chloroplast membrane; GO:0016491,oxidoreductase activity; GO:0006636,unsaturated fatty acid biosynthetic process
gene-LOC100125634	GO:0007275,multicellular organism development
gene-LOC100125635	GO:0005634,nucleus; GO:0003677,DNA binding; GO:0003700,DNA-binding transcription factor activity; GO:0000981,DNA-binding transcription factor activity, RNA polymerase II-specific; GO:0043565,sequence-specific DNA binding; GO:0001135,RNA polymerase II transcription regulator recruiting activity; GO:0044212,transcription regulatory region DNA binding; GO:0030154,cell differentiation; GO:1903086,neg…
gene-LOC100125638	GO:0009501,amyloplast; GO:0009569,chloroplast starch grain; GO:0102502,ADP-glucose-starch glucosyltransferase activity; GO:0004373,glycogen (starch) synthase activity; GO:0019252,starch biosynthetic process
gene-LOC100125639	GO:0005576,extracellular region; GO:0020037,heme binding; GO:0046872,metal ion binding; GO:0004601,peroxidase activity; GO:0042744,hydrogen peroxide catabolic process; GO:0006979,response to oxidative stress
gene-LOC100125640	GO:0005634,nucleus; GO:0005524,ATP binding; GO:0032502,developmental process; GO:0006355,regulation of transcription, DNA-templated; GO:0006351,transcription, DNA-templated
gene-LOC100125641	GO:0005634,nucleus; GO:0005524,ATP binding; GO:0032502,developmental process; GO:0006355,regulation of transcription, DNA-templated; GO:0006351,transcription, DNA-templated
gene-LOC100125642	GO:0005634,nucleus; GO:0005524,ATP binding; GO:0032502,developmental process; GO:0006355,regulation of transcription, DNA-templated; GO:0006351,transcription, DNA-templated
gene-LOC100125643	GO:0005634,nucleus; GO:0005524,ATP binding; GO:0032502,developmental process; GO:0006355,regulation of transcription, DNA-templated; GO:0006351,transcription, DNA-templated
gene-LOC100125644	GO:0005634,nucleus; GO:0005524,ATP binding; GO:0032502,developmental process; GO:0006355,regulation of transcription, DNA-templated; GO:0006351,transcription, DNA-templated
gene-LOC100125645	GO:0005634,nucleus; GO:0010311,lateral root formation
gene-LOC100125646	GO:0017096,acetylserotonin O-methyltransferase activity; GO:0047763,caffeate O-methyltransferase activity; GO:0030744,luteolin O-methyltransferase activity; GO:0046983,protein dimerization activity; GO:0051555,flavonol biosynthetic process; GO:0009809,lignin biosynthetic process; GO:0030187,melatonin biosynthetic process
gene-LOC100125647	GO:0016021,integral component of membrane; GO:0005886,plasma membrane; GO:0005524,ATP binding; GO:0090417,N-methylnicotinate transmembrane transporter activity; GO:0090416,nicotinate transmembrane transporter activity; GO:2001143,N-methylnicotinate transport; GO:2001142,nicotinate transport
gene-LOC100125648	GO:0030870,Mre11 complex; GO:0008408,3'-5' exonuclease activity; GO:0004519,endonuclease activity; GO:0030145,manganese ion binding; GO:0006302,double-strand break repair; GO:0051321,meiotic cell cycle
gene-LOC100125649	GO:0005737,cytoplasm; GO:0016853,isomerase activity; GO:0000287,magnesium ion binding; GO:0010333,terpene synthase activity; GO:0006952,defense response; GO:0016114,terpenoid biosynthetic process
gene-LOC100125650	GO:0005737,cytoplasm; GO:0005634,nucleus; GO:0005886,plasma membrane; GO:0005524,ATP binding; GO:0004674,protein serine/threonine kinase activity; GO:0009734,auxin-activated signaling pathway; GO:0009908,flower development; GO:0035556,intracellular signal transduction; GO:2000012,regulation of auxin polar transport; GO:0048364,root development; GO:0048367,shoot system development
gene-LOC100125653	GO:0005634,nucleus; GO:0050832,defense response to fungus
gene-LOC100125654	GO:0009570,chloroplast stroma; GO:0030529,NA; GO:0003725,double-stranded RNA binding; GO:0004525,ribonuclease III activity; GO:0003727,single-stranded RNA binding; GO:0000373,Group II intron splicing; GO:0006397,mRNA processing; GO:0042254,ribosome biogenesis
gene-LOC100125655	GO:0009507,chloroplast; GO:0009941,chloroplast envelope; GO:0009570,chloroplast stroma; GO:0009534,chloroplast thylakoid; GO:0009840,chloroplastic endopeptidase Clp complex; GO:0010287,plastoglobule; GO:0004252,serine-type endopeptidase activity; GO:0009658,chloroplast organization
gene-LOC100125656	GO:0030246,carbohydrate binding
gene-LOC100125657	GO:0009507,chloroplast; GO:0005524,ATP binding; GO:0008878,glucose-1-phosphate adenylyltransferase activity; GO:0005978,glycogen biosynthetic process; GO:0019252,starch biosynthetic process
gene-LOC100125658	GO:0005783,endoplasmic reticulum; GO:0005576,extracellular region; GO:0004029,aldehyde dehydrogenase (NAD) activity
gene-LOC100125659	GO:0016021,integral component of membrane; GO:0005524,ATP binding; GO:0042626,ATPase activity, coupled to transmembrane movement of substances; GO:0055085,transmembrane transport
gene-LOC100126359	GO:0009570,chloroplast stroma; GO:0030529,NA; GO:0009532,plastid stroma; GO:0003723,RNA binding; GO:0000372,Group I intron splicing; GO:0000373,Group II intron splicing; GO:0006397,mRNA processing
gene-LOC100126360	GO:0009507,chloroplast; GO:0009570,chloroplast stroma; GO:0030529,NA; GO:0005739,mitochondrion; GO:0003723,RNA binding; GO:0000373,Group II intron splicing; GO:0006397,mRNA processing
gene-LOC100126361	GO:0009507,chloroplast; GO:0003727,single-stranded RNA binding; GO:0031425,chloroplast RNA processing; GO:0000373,Group II intron splicing; GO:0006397,mRNA processing; GO:0006417,regulation of translation
gene-LOC100126363	GO:0005634,nucleus; GO:0005524,ATP binding; GO:0035299,inositol pentakisphosphate 2-kinase activity; GO:0046872,metal ion binding; GO:0032958,inositol phosphate biosynthetic process; GO:0052746,inositol phosphorylation
gene-LOC100126364	GO:0005789,endoplasmic reticulum membrane; GO:0016021,integral component of membrane
gene-LOC100126430	GO:0005576,extracellular region; GO:0005794,Golgi apparatus; GO:0007275,multicellular organism development; GO:0048868,pollen tube development
gene-LOC100126542	GO:0000139,Golgi membrane; GO:0016021,integral component of membrane; GO:0009678,hydrogen-translocating pyrophosphatase activity; GO:0004427,inorganic diphosphatase activity; GO:0046872,metal ion binding; GO:0015992,NA
gene-LOC100126801	GO:0005737,cytoplasm; GO:0016459,myosin complex; GO:0003779,actin binding; GO:0005524,ATP binding; GO:0005516,calmodulin binding; GO:0003774,motor activity; GO:0030048,actin filament-based movement
gene-LOC100126886	GO:0009507,chloroplast; GO:0006633,fatty acid biosynthetic process
gene-LOC100126887	GO:0020037,heme binding; GO:0005506,iron ion binding; GO:0004497,monooxygenase activity; GO:0016705,oxidoreductase activity, acting on paired donors, with incorporation or reduction of molecular oxygen; GO:0090709,regulation of timing of plant organ formation
gene-LOC100126898	GO:0005737,cytoplasm; GO:0033897,ribonuclease T2 activity; GO:0003723,RNA binding
gene-LOC100126901	GO:0005783,endoplasmic reticulum; GO:0016021,integral component of membrane; GO:0005741,mitochondrial outer membrane; GO:0009505,plant-type cell wall; GO:0005886,plasma membrane; GO:0004128,cytochrome-b5 reductase activity, acting on NAD(P)H; GO:0022900,electron transport chain
gene-LOC100126902	GO:0005871,kinesin complex; GO:0005874,microtubule; GO:0009524,phragmoplast; GO:0005524,ATP binding; GO:0016887,ATPase activity; GO:0008017,microtubule binding; GO:0003777,microtubule motor activity; GO:0000911,cytokinesis by cell plate formation; GO:0009558,embryo sac cellularization; GO:0007018,microtubule-based movement; GO:0009555,pollen development
gene-LOC100126914	GO:0005737,cytoplasm; GO:0030598,rRNA N-glycosylase activity; GO:0090729,toxin activity; GO:0006952,defense response; GO:0017148,negative regulation of translation
gene-LOC100126928	GO:0000781,chromosome, telomeric region; GO:0005634,nucleus; GO:0005524,ATP binding; GO:0003677,DNA binding; GO:0004386,helicase activity; GO:0042393,histone binding; GO:0046872,metal ion binding; GO:0016569,covalent chromatin modification; GO:0006281,DNA repair; GO:0043007,maintenance of rDNA; GO:0009555,pollen development; GO:1900049,regulation of histone exchange; GO:0006355,regulation of tran…
gene-LOC100126935	GO:0071949,FAD binding
gene-LOC100126941	GO:0005829,cytosol; GO:0061630,ubiquitin protein ligase activity; GO:0009737,response to abscisic acid; GO:0009651,response to salt stress; GO:0006511,ubiquitin-dependent protein catabolic process
gene-LOC100126948	GO:0005576,extracellular region; GO:0006952,defense response; GO:0050832,defense response to fungus; GO:0031640,killing of cells of other organism
gene-LOC100126965	GO:0005634,nucleus; GO:0003677,DNA binding; GO:0006310,DNA recombination; GO:0006281,DNA repair; GO:0006260,DNA replication
gene-LOC100126971	GO:0005789,endoplasmic reticulum membrane; GO:0016021,integral component of membrane; GO:0005524,ATP binding; GO:0046872,metal ion binding; GO:0000155,phosphorelay sensor kinase activity; GO:0009873,ethylene-activated signaling pathway
gene-LOC100127010	GO:0031418,L-ascorbic acid binding; GO:0050589,leucocyanidin oxygenase activity; GO:0046872,metal ion binding; GO:0009718,anthocyanin-containing compound biosynthetic process; GO:0010023,proanthocyanidin biosynthetic process; GO:0009753,response to jasmonic acid; GO:0009611,response to wounding; GO:0007033,vacuole organization
gene-LOC100127013	GO:0005739,mitochondrion; GO:0070469,respiratory chain; GO:0051539,4 iron, 4 sulfur cluster binding; GO:0046872,metal ion binding; GO:0008137,NADH dehydrogenase (ubiquinone) activity; GO:0048038,quinone binding
gene-LOC100127014	GO:0008171,O-methyltransferase activity; GO:0046983,protein dimerization activity; GO:0008757,S-adenosylmethionine-dependent methyltransferase activity; GO:0019438,aromatic compound biosynthetic process
gene-LOC100127017	GO:0033116,endoplasmic reticulum-Golgi intermediate compartment membrane; GO:0005525,GTP binding; GO:0003924,GTPase activity; GO:0015031,protein transport
gene-LOC100127494	GO:0033116,endoplasmic reticulum-Golgi intermediate compartment membrane; GO:0005525,GTP binding; GO:0003924,GTPase activity; GO:0015031,protein transport
gene-LOC100127507	GO:0006950,response to stress
gene-LOC100127508	GO:0005524,ATP binding; GO:0004143,diacylglycerol kinase activity; GO:0003951,NAD+ kinase activity; GO:0006952,defense response; GO:0007205,protein kinase C-activating G protein-coupled receptor signaling pathway
gene-LOC100127509	GO:0016021,integral component of membrane; GO:0005622,intracellular; GO:0005524,ATP binding; GO:0005509,calcium ion binding; GO:0003951,NAD+ kinase activity; GO:0006952,defense response; GO:0035556,intracellular signal transduction; GO:0007205,protein kinase C-activating G protein-coupled receptor signaling pathway
gene-LOC100127510	GO:0005524,ATP binding; GO:0004143,diacylglycerol kinase activity; GO:0003951,NAD+ kinase activity; GO:0006952,defense response; GO:0007205,protein kinase C-activating G protein-coupled receptor signaling pathway
gene-LOC100127511	GO:0005634,nucleus; GO:0003677,DNA binding; GO:0007275,multicellular organism development; GO:0006355,regulation of transcription, DNA-templated; GO:0006351,transcription, DNA-templated
gene-LOC100127513	GO:0005737,cytoplasm; GO:0005634,nucleus; GO:0009910,negative regulation of flower development; GO:0010228,vegetative to reproductive phase transition of meristem
gene-LOC100127514	GO:0005737,cytoplasm
gene-LOC100127515	GO:0005737,cytoplasm
gene-LOC100127516	GO:0005737,cytoplasm
gene-LOC100127517	GO:0005737,cytoplasm; GO:0005634,nucleus; GO:0009910,negative regulation of flower development; GO:0010228,vegetative to reproductive phase transition of meristem
gene-LOC100127518	GO:0005737,cytoplasm; GO:0005634,nucleus; GO:0008429,phosphatidylethanolamine binding; GO:0030154,cell differentiation; GO:0009908,flower development; GO:0010229,inflorescence development; GO:0009909,regulation of flower development; GO:0048510,regulation of timing of transition from vegetative to reproductive phase; GO:0048572,short-day photoperiodism; GO:0048575,short-day photoperiodism, flower…
gene-LOC100127519	GO:0005737,cytoplasm; GO:0005634,nucleus; GO:0008429,phosphatidylethanolamine binding; GO:0030154,cell differentiation; GO:0009908,flower development; GO:0010229,inflorescence development; GO:0009909,regulation of flower development; GO:0048510,regulation of timing of transition from vegetative to reproductive phase; GO:0048572,short-day photoperiodism; GO:0048575,short-day photoperiodism, flower…
gene-LOC100127522	GO:0005737,cytoplasm; GO:0005634,nucleus; GO:0008429,phosphatidylethanolamine binding; GO:0030154,cell differentiation; GO:0009908,flower development; GO:0010229,inflorescence development; GO:0009909,regulation of flower development; GO:0048510,regulation of timing of transition from vegetative to reproductive phase; GO:0048572,short-day photoperiodism; GO:0048575,short-day photoperiodism, flower…
gene-LOC100127524	GO:0005737,cytoplasm; GO:0005634,nucleus; GO:0008429,phosphatidylethanolamine binding; GO:0030154,cell differentiation; GO:0009908,flower development; GO:0010229,inflorescence development; GO:0009909,regulation of flower development; GO:0048510,regulation of timing of transition from vegetative to reproductive phase; GO:0048572,short-day photoperiodism; GO:0048575,short-day photoperiodism, flower…
gene-LOC100127525	GO:0005737,cytoplasm; GO:0005783,endoplasmic reticulum; GO:0005634,nucleus; GO:0008429,phosphatidylethanolamine binding; GO:0030154,cell differentiation; GO:0009908,flower development; GO:0048573,photoperiodism, flowering; GO:0009911,positive regulation of flower development; GO:0009909,regulation of flower development; GO:0010119,regulation of stomatal movement
gene-LOC100127526	GO:0005737,cytoplasm; GO:0008429,phosphatidylethanolamine binding; GO:0048573,photoperiodism, flowering; GO:0009911,positive regulation of flower development
gene-LOC100127527	GO:0005737,cytoplasm; GO:0005783,endoplasmic reticulum; GO:0005634,nucleus; GO:0008429,phosphatidylethanolamine binding; GO:0030154,cell differentiation; GO:0009908,flower development; GO:0048573,photoperiodism, flowering; GO:0009911,positive regulation of flower development; GO:0009909,regulation of flower development; GO:0010119,regulation of stomatal movement
gene-LOC100127528	GO:0005737,cytoplasm; GO:0005783,endoplasmic reticulum; GO:0005634,nucleus; GO:0008429,phosphatidylethanolamine binding; GO:0030154,cell differentiation; GO:0009908,flower development; GO:0048573,photoperiodism, flowering; GO:0009911,positive regulation of flower development; GO:0009909,regulation of flower development; GO:0010119,regulation of stomatal movement
gene-LOC100127529	GO:0005737,cytoplasm; GO:0008429,phosphatidylethanolamine binding; GO:0048573,photoperiodism, flowering; GO:0009911,positive regulation of flower development
gene-LOC100127530	GO:0005737,cytoplasm; GO:0005783,endoplasmic reticulum; GO:0005634,nucleus; GO:0008429,phosphatidylethanolamine binding; GO:0030154,cell differentiation; GO:0009908,flower development; GO:0048573,photoperiodism, flowering; GO:0009911,positive regulation of flower development; GO:0009909,regulation of flower development; GO:0010119,regulation of stomatal movement
gene-LOC100127531	GO:0005634,nucleus; GO:0000989,NA; GO:0009740,gibberellic acid mediated signaling pathway; GO:0006355,regulation of transcription, DNA-templated; GO:0006351,transcription, DNA-templated
gene-LOC100127532	GO:0003676,nucleic acid binding; GO:0008270,zinc ion binding
gene-LOC100127534	GO:0003677,DNA binding; GO:0008270,zinc ion binding
gene-LOC100127535	GO:0008270,zinc ion binding; GO:0009737,response to abscisic acid; GO:0010200,response to chitin
gene-LOC100127539	GO:0005737,cytoplasm; GO:0005634,nucleus; GO:0008429,phosphatidylethanolamine binding; GO:0030154,cell differentiation; GO:0009908,flower development; GO:0010229,inflorescence development; GO:0009909,regulation of flower development; GO:0048510,regulation of timing of transition from vegetative to reproductive phase; GO:0048572,short-day photoperiodism; GO:0048575,short-day photoperiodism, flower…
gene-LOC100127541	GO:0003677,DNA binding; GO:0008270,zinc ion binding
gene-LOC100135421	GO:0050662,coenzyme binding; GO:0016491,oxidoreductase activity; GO:0009813,flavonoid biosynthetic process
gene-LOC100135422	GO:0016021,integral component of membrane; GO:0009737,response to abscisic acid; GO:0009409,response to cold; GO:0009651,response to salt stress
gene-LOC100136826	GO:0005783,endoplasmic reticulum; GO:0005794,Golgi apparatus; GO:0016021,integral component of membrane; GO:0016020,membrane; GO:0003881,CDP-diacylglycerol-inositol 3-phosphatidyltransferase activity; GO:0046872,metal ion binding; GO:0008654,phospholipid biosynthetic process
gene-LOC100136827	GO:0005622,intracellular; GO:0005886,plasma membrane; GO:0004435,phosphatidylinositol phospholipase C activity; GO:0004629,phospholipase C activity; GO:0004871,NA; GO:0042742,defense response to bacterium; GO:0009553,embryo sac development; GO:0048437,floral organ development; GO:0035556,intracellular signal transduction; GO:0016042,lipid catabolic process; GO:0009556,microsporogenesis; GO:001060…
gene-LOC100136828	GO:0009501,amyloplast; GO:0009507,chloroplast; GO:0033201,alpha-1,4-glucan synthase activity; GO:0004373,glycogen (starch) synthase activity; GO:0009011,starch synthase activity; GO:0019252,starch biosynthetic process
gene-LOC100136878	GO:0009501,amyloplast; GO:0009507,chloroplast; GO:0009570,chloroplast stroma; GO:0009536,plastid; GO:0003844,1,4-alpha-glucan branching enzyme activity; GO:0102752,1,4-alpha-glucan branching enzyme activity (using a glucosylated glycogenin as primer for glycogen synthesis); GO:0043169,cation binding; GO:0005975,carbohydrate metabolic process; GO:0005978,glycogen biosynthetic process; GO:0009791,p…
gene-LOC100136879	GO:0009507,chloroplast; GO:0009941,chloroplast envelope; GO:0016021,integral component of membrane; GO:0016020,membrane; GO:0005886,plasma membrane; GO:0009506,plasmodesma; GO:0005774,vacuolar membrane; GO:0005773,vacuole; GO:0006811,ion transport
gene-LOC100136880	GO:0016021,integral component of membrane; GO:0005509,calcium ion binding; GO:0050664,oxidoreductase activity, acting on NAD(P)H, oxygen as acceptor; GO:0004601,peroxidase activity
gene-LOC100136881	GO:0009570,chloroplast stroma; GO:0004072,aspartate kinase activity; GO:0005524,ATP binding; GO:0008652,cellular amino acid biosynthetic process; GO:0009089,lysine biosynthetic process via diaminopimelate; GO:0009088,threonine biosynthetic process
gene-LOC100136882	GO:0009507,chloroplast; GO:0004310,farnesyl-diphosphate farnesyltransferase activity; GO:0016767,geranylgeranyl-diphosphate geranylgeranyltransferase activity; GO:0051996,squalene synthase activity; GO:0016117,carotenoid biosynthetic process; GO:0006696,ergosterol biosynthetic process
gene-LOC100136884	GO:0016021,integral component of membrane; GO:0005886,plasma membrane; GO:0009506,plasmodesma; GO:0005524,ATP binding; GO:0004672,protein kinase activity; GO:0004674,protein serine/threonine kinase activity; GO:0009741,response to brassinosteroid; GO:0009826,unidimensional cell growth
gene-LOC100136885	GO:0009507,chloroplast; GO:0005737,cytoplasm; GO:0005615,extracellular space; GO:0005507,copper ion binding; GO:0004784,superoxide dismutase activity; GO:0008270,zinc ion binding
gene-LOC100141385	GO:0005622,intracellular; GO:0005524,ATP binding; GO:0004674,protein serine/threonine kinase activity; GO:0035556,intracellular signal transduction; GO:0018105,peptidyl-serine phosphorylation; GO:0018107,peptidyl-threonine phosphorylation
gene-LOC100144300	GO:0005737,cytoplasm; GO:0015630,microtubule cytoskeleton; GO:0003723,RNA binding; GO:0043622,cortical microtubule organization; GO:0051607,defense response to virus; GO:0051224,negative regulation of protein transport; GO:0010497,plasmodesmata-mediated intercellular transport; GO:0002230,positive regulation of defense response to virus by host; GO:0051493,regulation of cytoskeleton organization;…
gene-LOC100144301	GO:0005524,ATP binding; GO:0042802,identical protein binding; GO:0046872,metal ion binding; GO:0004797,thymidine kinase activity; GO:0071897,DNA biosynthetic process; GO:0006259,DNA metabolic process; GO:0006302,double-strand break repair; GO:0010225,response to UV-C; GO:0046104,thymidine metabolic process
gene-LOC100147731	GO:0008171,O-methyltransferase activity; GO:0046983,protein dimerization activity; GO:0102718,TRIBOA-glucoside methyltransferase activity
gene-LOC100147733	GO:0005654,nucleoplasm; GO:0030154,cell differentiation; GO:0007623,circadian rhythm; GO:0009908,flower development; GO:0048578,positive regulation of long-day photoperiodism, flowering; GO:0006355,regulation of transcription, DNA-templated; GO:0009637,response to blue light; GO:0009409,response to cold; GO:0010218,response to far red light; GO:0042542,response to hydrogen peroxide; GO:0080167,re…
gene-LOC100147734	GO:0009941,chloroplast envelope; GO:0009535,chloroplast thylakoid membrane; GO:0016021,integral component of membrane; GO:0005524,ATP binding; GO:0004176,ATP-dependent peptidase activity; GO:0046872,metal ion binding; GO:0004222,metalloendopeptidase activity; GO:0008237,metallopeptidase activity; GO:0010205,photoinhibition; GO:0010206,photosystem II repair; GO:0006508,proteolysis; GO:0010304,PSII…
gene-LOC100147735	GO:0009941,chloroplast envelope; GO:0009535,chloroplast thylakoid membrane; GO:0016021,integral component of membrane; GO:0005524,ATP binding; GO:0004176,ATP-dependent peptidase activity; GO:0046872,metal ion binding; GO:0004222,metalloendopeptidase activity; GO:0008237,metallopeptidase activity; GO:0010205,photoinhibition; GO:0010206,photosystem II repair; GO:0006508,proteolysis; GO:0010304,PSII…
gene-LOC100147736	GO:0005634,nucleus; GO:0003677,DNA binding; GO:0003700,DNA-binding transcription factor activity; GO:0008270,zinc ion binding; GO:0030154,cell differentiation; GO:0009908,flower development; GO:0048571,long-day photoperiodism; GO:0048579,negative regulation of long-day photoperiodism, flowering; GO:0045892,negative regulation of transcription, DNA-templated; GO:0048576,positive regulation of shor…
gene-LOC100147737	GO:0005634,nucleus; GO:0003700,DNA-binding transcription factor activity; GO:0043565,sequence-specific DNA binding; GO:0009617,response to bacterium; GO:0010200,response to chitin; GO:0009620,response to fungus; GO:0006351,transcription, DNA-templated
gene-LOC100147738	GO:0016021,integral component of membrane; GO:0005886,plasma membrane; GO:0046872,metal ion binding; GO:0008237,metallopeptidase activity; GO:0010074,maintenance of meristem identity; GO:0007275,multicellular organism development; GO:0040008,regulation of growth; GO:2000034,regulation of seed maturation
gene-LOC100158226	GO:0009507,chloroplast; GO:0005739,mitochondrion; GO:0031965,nuclear membrane; GO:0005634,nucleus; GO:0009536,plastid; GO:0052623,ADP dimethylallyltransferase activity; GO:0009824,AMP dimethylallyltransferase activity; GO:0005524,ATP binding; GO:0052622,ATP dimethylallyltransferase activity; GO:0052381,tRNA dimethylallyltransferase activity; GO:0009691,cytokinin biosynthetic process; GO:0006400,t…
gene-LOC100158231	GO:0005829,cytosol; GO:0005739,mitochondrion; GO:0009824,AMP dimethylallyltransferase activity; GO:0005524,ATP binding; GO:0052381,tRNA dimethylallyltransferase activity; GO:0009691,cytokinin biosynthetic process; GO:0006400,tRNA modification
gene-LOC100170234	GO:0009507,chloroplast; GO:0009941,chloroplast envelope; GO:0009706,chloroplast inner membrane; GO:0016021,integral component of membrane; GO:0005743,mitochondrial inner membrane; GO:0005739,mitochondrion; GO:0009536,plastid; GO:0006839,mitochondrial transport; GO:0055085,transmembrane transport
gene-LOC100170235	GO:0009570,chloroplast stroma; GO:0005634,nucleus; GO:0003677,DNA binding; GO:0003723,RNA binding; GO:0003697,single-stranded DNA binding; GO:0006952,defense response; GO:0006281,DNA repair; GO:0045910,negative regulation of DNA recombination; GO:0006355,regulation of transcription, DNA-templated
gene-LOC100170236	GO:0009501,amyloplast; GO:0009507,chloroplast; GO:0033201,alpha-1,4-glucan synthase activity; GO:0004373,glycogen (starch) synthase activity; GO:0009011,starch synthase activity; GO:0019252,starch biosynthetic process; GO:0005982,starch metabolic process
gene-LOC100170237	GO:0004519,endonuclease activity; GO:0046872,metal ion binding; GO:0003676,nucleic acid binding; GO:0006308,DNA catabolic process
gene-LOC100170238	GO:0005737,cytoplasm; GO:0033984,indole-3-glycerol-phosphate lyase activity; GO:0004834,tryptophan synthase activity; GO:0009851,auxin biosynthetic process
gene-LOC100170239	GO:0005618,cell wall; GO:0005576,extracellular region; GO:0005773,vacuole; GO:0003825,alpha,alpha-trehalose-phosphate synthase (UDP-forming) activity; GO:0016791,phosphatase activity; GO:0051301,cell division; GO:0009793,embryo development ending in seed dormancy; GO:0009832,plant-type cell wall biogenesis; GO:0010182,sugar mediated signaling pathway; GO:0005992,trehalose biosynthetic process; GO…
gene-LOC100170241	GO:0005634,nucleus; GO:0061630,ubiquitin protein ligase activity; GO:0008270,zinc ion binding; GO:0007275,multicellular organism development; GO:0006511,ubiquitin-dependent protein catabolic process
gene-LOC100170242	GO:0005634,nucleus; GO:0061630,ubiquitin protein ligase activity; GO:0008270,zinc ion binding; GO:0007275,multicellular organism development; GO:0006511,ubiquitin-dependent protein catabolic process
gene-LOC100170243	GO:0005737,cytoplasm; GO:0005634,nucleus; GO:0061630,ubiquitin protein ligase activity; GO:0008270,zinc ion binding; GO:0007275,multicellular organism development; GO:0080148,negative regulation of response to water deprivation; GO:0006511,ubiquitin-dependent protein catabolic process
gene-LOC100170244	GO:0005737,cytoplasm; GO:0005634,nucleus; GO:0061630,ubiquitin protein ligase activity; GO:0008270,zinc ion binding; GO:0007275,multicellular organism development; GO:0080148,negative regulation of response to water deprivation; GO:0006511,ubiquitin-dependent protein catabolic process
gene-LOC100170245	GO:0005634,nucleus; GO:0061630,ubiquitin protein ligase activity; GO:0008270,zinc ion binding; GO:0007275,multicellular organism development; GO:0006511,ubiquitin-dependent protein catabolic process
gene-LOC100170246	GO:0009707,chloroplast outer membrane; GO:0005829,cytosol; GO:0016021,integral component of membrane; GO:0005739,mitochondrion; GO:0005524,ATP binding; GO:0008865,fructokinase activity; GO:0004340,glucokinase activity; GO:0005536,glucose binding; GO:0019158,mannokinase activity; GO:0001678,cellular glucose homeostasis; GO:0006096,glycolytic process; GO:0009749,response to glucose
gene-LOC100170248	GO:0009941,chloroplast envelope; GO:0009706,chloroplast inner membrane; GO:0016021,integral component of membrane; GO:0005355,glucose transmembrane transporter activity; GO:0005351,carbohydrate:proton symporter activity; GO:0046323,glucose import; GO:0035428,NA
gene-LOC100170249	GO:0009507,chloroplast; GO:0009941,chloroplast envelope; GO:0009706,chloroplast inner membrane; GO:0016021,integral component of membrane; GO:0005743,mitochondrial inner membrane; GO:0005739,mitochondrion; GO:0009536,plastid; GO:0006839,mitochondrial transport; GO:0055085,transmembrane transport
gene-LOC100170250	GO:0009501,amyloplast; GO:0009507,chloroplast; GO:0033201,alpha-1,4-glucan synthase activity; GO:0004373,glycogen (starch) synthase activity; GO:0009011,starch synthase activity; GO:0019252,starch biosynthetic process; GO:0005982,starch metabolic process
gene-LOC100170665	GO:0005634,nucleus; GO:0042803,protein homodimerization activity; GO:0043565,sequence-specific DNA binding; GO:1901002,positive regulation of response to salt stress; GO:1902584,positive regulation of response to water deprivation; GO:0006355,regulation of transcription, DNA-templated; GO:0006351,transcription, DNA-templated
gene-LOC100174970	GO:0005739,mitochondrion; GO:0005524,ATP binding; GO:0052381,tRNA dimethylallyltransferase activity; GO:0009691,cytokinin biosynthetic process; GO:0006400,tRNA modification
gene-LOC100174971	GO:0005929,cilium; GO:0000139,Golgi membrane; GO:0005815,microtubule organizing center; GO:0005634,nucleus; GO:0005819,spindle; GO:0005525,GTP binding; GO:0007049,cell cycle; GO:0051301,cell division; GO:0015031,protein transport; GO:0007264,small GTPase mediated signal transduction
gene-LOC100174972	GO:0009507,chloroplast; GO:0008422,beta-glucosidase activity; GO:0102726,DIMBOA glucoside beta-D-glucosidase activity; GO:0102483,scopolin beta-glucosidase activity; GO:0005975,carbohydrate metabolic process
gene-LOC100191140	GO:0009507,chloroplast; GO:0005737,cytoplasm; GO:0004418,hydroxymethylbilane synthase activity; GO:0015995,chlorophyll biosynthetic process; GO:0006783,heme biosynthetic process; GO:0018160,peptidyl-pyrromethane cofactor linkage; GO:0006782,protoporphyrinogen IX biosynthetic process
gene-LOC100191141	GO:0030246,carbohydrate binding
gene-LOC100191142	GO:0005737,cytoplasm; GO:0005874,microtubule; GO:0010031,circumnutation; GO:0010015,root morphogenesis
gene-LOC100191143	GO:0032783,ELL-EAF complex; GO:0003746,translation elongation factor activity; GO:0006355,regulation of transcription, DNA-templated
gene-LOC100191144	GO:0004034,aldose 1-epimerase activity; GO:0030246,carbohydrate binding; GO:0019318,hexose metabolic process
gene-LOC100191145	GO:0009507,chloroplast; GO:0045454,cell redox homeostasis; GO:0055114,oxidation-reduction process
gene-LOC100191146	GO:0005739,mitochondrion; GO:0005524,ATP binding; GO:0005507,copper ion binding; GO:0003723,RNA binding; GO:0003697,single-stranded DNA binding; GO:0016554,cytidine to uridine editing; GO:0080156,mitochondrial mRNA modification; GO:0006397,mRNA processing; GO:0009409,response to cold
gene-LOC100191147	GO:0005737,cytoplasm; GO:0005524,ATP binding; GO:0004709,MAP kinase kinase kinase activity; GO:0004674,protein serine/threonine kinase activity; GO:0032147,activation of protein kinase activity; GO:0007346,regulation of mitotic cell cycle; GO:0023014,signal transduction by protein phosphorylation; GO:0031098,stress-activated protein kinase signaling cascade
gene-LOC100191148	GO:0016021,integral component of membrane; GO:0005743,mitochondrial inner membrane; GO:0005739,mitochondrion; GO:0005507,copper ion binding; GO:0045454,cell redox homeostasis; GO:0006878,cellular copper ion homeostasis; GO:0006825,copper ion transport; GO:0009793,embryo development ending in seed dormancy; GO:0033617,mitochondrial respiratory chain complex IV assembly
gene-LOC100191149	GO:0016021,integral component of membrane; GO:0004177,aminopeptidase activity
gene-LOC100191151	GO:0000139,Golgi membrane; GO:0016021,integral component of membrane; GO:0016757,transferase activity, transferring glycosyl groups; GO:0071555,cell wall organization; GO:0006486,protein glycosylation
gene-LOC100191152	GO:0004105,choline-phosphate cytidylyltransferase activity; GO:0006656,phosphatidylcholine biosynthetic process
gene-LOC100191153	GO:0005576,extracellular region; GO:0009505,plant-type cell wall; GO:0009506,plasmodesma; GO:0020037,heme binding; GO:0046872,metal ion binding; GO:0004601,peroxidase activity; GO:0042744,hydrogen peroxide catabolic process; GO:0009664,plant-type cell wall organization; GO:0006979,response to oxidative stress
gene-LOC100191154	GO:0005737,cytoplasm; GO:0005634,nucleus; GO:0019773,proteasome core complex, alpha-subunit complex; GO:0004298,threonine-type endopeptidase activity; GO:0006511,ubiquitin-dependent protein catabolic process
gene-LOC100191155	GO:0005829,cytosol
gene-LOC100191156	GO:0005829,cytosol; GO:0016020,membrane; GO:0016607,nuclear speck; GO:0005681,spliceosomal complex; GO:0003729,mRNA binding; GO:0000398,mRNA splicing, via spliceosome; GO:0008380,RNA splicing
gene-LOC100191157	GO:0005737,cytoplasm; GO:0046872,metal ion binding; GO:0061630,ubiquitin protein ligase activity; GO:0043161,proteasome-mediated ubiquitin-dependent protein catabolic process; GO:0000209,protein polyubiquitination; GO:0042787,NA
gene-LOC100191159	GO:0005634,nucleus; GO:0042802,identical protein binding; GO:0051082,unfolded protein binding; GO:0043388,positive regulation of DNA binding
gene-LOC100191160	GO:0009507,chloroplast; GO:0009295,nucleoid; GO:0009508,plastid chromosome; GO:0003690,double-stranded DNA binding; GO:0019843,rRNA binding; GO:0003727,single-stranded RNA binding; GO:0009658,chloroplast organization; GO:0032502,developmental process; GO:0006353,DNA-templated transcription, termination; GO:0006355,regulation of transcription, DNA-templated; GO:0042255,ribosome assembly; GO:000838…
gene-LOC100191162	GO:0016021,integral component of membrane
gene-LOC100191163	GO:0005737,cytoplasm; GO:0005634,nucleus; GO:0005819,spindle; GO:0051026,chiasma assembly; GO:0007059,chromosome segregation; GO:0009553,embryo sac development; GO:0007140,male meiotic nuclear division; GO:0042138,meiotic DNA double-strand break formation; GO:0000212,meiotic spindle organization; GO:0048236,plant-type sporogenesis; GO:0009555,pollen development
gene-LOC100191165	GO:0005737,cytoplasm; GO:0008676,3-deoxy-8-phosphooctulonate synthase activity; GO:0009058,biosynthetic process
gene-LOC100191167	GO:0046872,metal ion binding; GO:0004722,protein serine/threonine phosphatase activity
gene-LOC100191168	GO:0005886,plasma membrane; GO:0005525,GTP binding; GO:0003924,GTPase activity
gene-LOC100191169	GO:0005542,folic acid binding; GO:0016740,transferase activity; GO:0008152,metabolic process
gene-LOC100191170	GO:0005634,nucleus; GO:0003700,DNA-binding transcription factor activity; GO:0043565,sequence-specific DNA binding; GO:0044212,transcription regulatory region DNA binding; GO:0006970,response to osmotic stress; GO:0009651,response to salt stress; GO:0009414,response to water deprivation; GO:0006351,transcription, DNA-templated
gene-LOC100191171	GO:0005829,cytosol; GO:0005524,ATP binding; GO:0004592,pantoate-beta-alanine ligase activity; GO:0042803,protein homodimerization activity; GO:0009793,embryo development ending in seed dormancy; GO:0033317,pantothenate biosynthetic process from valine
gene-LOC100191172	GO:0005634,nucleus; GO:0003677,DNA binding; GO:0003700,DNA-binding transcription factor activity; GO:0006355,regulation of transcription, DNA-templated; GO:0006351,transcription, DNA-templated
gene-LOC100191173	GO:0016021,integral component of membrane; GO:0008375,acetylglucosaminyltransferase activity
gene-LOC100191175	GO:0005634,nucleus; GO:0003677,DNA binding; GO:0003700,DNA-binding transcription factor activity; GO:2000032,regulation of secondary shoot formation; GO:0006355,regulation of transcription, DNA-templated; GO:0010223,secondary shoot formation; GO:0006351,transcription, DNA-templated
gene-LOC100191176	GO:0009507,chloroplast; GO:0000287,magnesium ion binding
gene-LOC100191177	GO:0005783,endoplasmic reticulum; GO:0005794,Golgi apparatus; GO:0005886,plasma membrane; GO:0009506,plasmodesma; GO:0003846,2-acylglycerol O-acyltransferase activity; GO:0090430,caffeoyl-CoA: alcohol caffeoyl transferase activity; GO:0016787,hydrolase activity; GO:0004622,lysophospholipase activity; GO:0009809,lignin biosynthetic process; GO:0006629,lipid metabolic process; GO:0046686,response t…
gene-LOC100191178	GO:0005576,extracellular region; GO:0016788,hydrolase activity, acting on ester bonds; GO:0016042,lipid catabolic process
gene-LOC100191179	GO:0005783,endoplasmic reticulum; GO:0005789,endoplasmic reticulum membrane; GO:0009923,fatty acid elongase complex; GO:0016021,integral component of membrane; GO:0005886,plasma membrane; GO:0009922,fatty acid elongase activity; GO:0016627,oxidoreductase activity, acting on the CH-CH group of donors; GO:0042335,cuticle development; GO:0006665,sphingolipid metabolic process; GO:0010091,trichome br…
gene-LOC100191180	GO:0005720,nuclear heterochromatin; GO:0005634,nucleus; GO:0042393,histone binding; GO:0046872,metal ion binding; GO:0008327,methyl-CpG binding; GO:0010428,methyl-CpNpG binding; GO:0010429,methyl-CpNpN binding; GO:0061630,ubiquitin protein ligase activity; GO:0004842,ubiquitin-protein transferase activity; GO:0016569,covalent chromatin modification; GO:0032776,DNA methylation on cytosine; GO:0010…
gene-LOC100191181	GO:0009507,chloroplast
gene-LOC100191182	GO:0005634,nucleus; GO:0003677,DNA binding; GO:0003700,DNA-binding transcription factor activity; GO:0006351,transcription, DNA-templated
gene-LOC100191184	GO:0005783,endoplasmic reticulum; GO:0005789,endoplasmic reticulum membrane; GO:0071782,endoplasmic reticulum tubular network; GO:0005794,Golgi apparatus; GO:0071458,integral component of cytoplasmic side of endoplasmic reticulum membrane; GO:0005886,plasma membrane; GO:0071786,endoplasmic reticulum tubular network organization
gene-LOC100191185	GO:0003677,DNA binding; GO:0046872,metal ion binding; GO:0003723,RNA binding
gene-LOC100191187	GO:0016021,integral component of membrane; GO:0004252,serine-type endopeptidase activity; GO:0043130,ubiquitin binding
gene-LOC100191188	GO:0005634,nucleus; GO:0003677,DNA binding; GO:0006355,regulation of transcription, DNA-templated; GO:0006351,transcription, DNA-templated
gene-LOC100191189	GO:0005737,cytoplasm; GO:0046872,metal ion binding; GO:0004721,phosphoprotein phosphatase activity
gene-LOC100191190	GO:0005840,ribosome; GO:0042254,ribosome biogenesis
gene-LOC100191192	GO:0009507,chloroplast; GO:0016297,acyl-[acyl-carrier-protein] hydrolase activity; GO:0016295,myristoyl-[acyl-carrier-protein] hydrolase activity; GO:0004320,oleoyl-[acyl-carrier-protein] hydrolase activity; GO:0016296,palmitoyl-[acyl-carrier-protein] hydrolase activity; GO:0006633,fatty acid biosynthetic process
gene-LOC100191193	GO:0005524,ATP binding; GO:0004222,metalloendopeptidase activity
gene-LOC100191194	GO:0003993,acid phosphatase activity
gene-LOC100191195	GO:0009507,chloroplast; GO:0003723,RNA binding
gene-LOC100191197	GO:0031225,anchored component of membrane; GO:0005886,plasma membrane
gene-LOC100191198	GO:0071011,precatalytic spliceosome; GO:0006397,mRNA processing; GO:0010226,response to lithium ion; GO:0009651,response to salt stress; GO:0008380,RNA splicing
gene-LOC100191199	GO:0046872,metal ion binding; GO:0004721,phosphoprotein phosphatase activity
gene-LOC100191200	GO:0005618,cell wall; GO:0005576,extracellular region; GO:0005199,structural constituent of cell wall; GO:0071555,cell wall organization
gene-LOC100191201	GO:0009507,chloroplast; GO:0009536,plastid; GO:0008889,glycerophosphodiester phosphodiesterase activity; GO:0000287,magnesium ion binding; GO:0030643,cellular phosphate ion homeostasis; GO:0006071,glycerol metabolic process; GO:0046475,glycerophospholipid catabolic process
gene-LOC100191203	GO:0005681,spliceosomal complex; GO:0000398,mRNA splicing, via spliceosome
gene-LOC100191204	GO:0005737,cytoplasm; GO:0005634,nucleus; GO:0046872,metal ion binding; GO:0016740,transferase activity; GO:0016567,protein ubiquitination; GO:0009585,red, far-red light phototransduction
gene-LOC100191206	GO:0005634,nucleus; GO:0003700,DNA-binding transcription factor activity; GO:0043565,sequence-specific DNA binding; GO:0006351,transcription, DNA-templated
gene-LOC100191207	GO:0016021,integral component of membrane
gene-LOC100191210	GO:0005634,nucleus; GO:0003677,DNA binding; GO:0003723,RNA binding; GO:0009908,flower development; GO:0048579,negative regulation of long-day photoperiodism, flowering; GO:0048577,negative regulation of short-day photoperiodism, flowering
gene-LOC100191211	GO:0005634,nucleus; GO:0003677,DNA binding; GO:0003700,DNA-binding transcription factor activity; GO:0043565,sequence-specific DNA binding; GO:0009738,abscisic acid-activated signaling pathway; GO:0006351,transcription, DNA-templated
gene-LOC100191212	GO:0005783,endoplasmic reticulum; GO:0005788,endoplasmic reticulum lumen; GO:0005886,plasma membrane; GO:0051082,unfolded protein binding; GO:0052033,pathogen-associated molecular pattern dependent induction by symbiont of host innate immune response; GO:0006457,protein folding
gene-LOC100191213	GO:0016021,integral component of membrane; GO:0008643,carbohydrate transport
gene-LOC100191214	GO:0005874,microtubule; GO:0000911,cytokinesis by cell plate formation; GO:0007020,microtubule nucleation; GO:0031023,microtubule organizing center organization; GO:0000278,mitotic cell cycle; GO:0051225,spindle assembly
gene-LOC100191216	GO:0046872,metal ion binding; GO:0004722,protein serine/threonine phosphatase activity
gene-LOC100191217	GO:0005576,extracellular region; GO:0020037,heme binding; GO:0046872,metal ion binding; GO:0004601,peroxidase activity; GO:0042744,hydrogen peroxide catabolic process; GO:0006979,response to oxidative stress; GO:0048511,rhythmic process
gene-LOC100191218	GO:0005829,cytosol; GO:0005576,extracellular region; GO:0009505,plant-type cell wall; GO:0050660,flavin adenine dinucleotide binding; GO:0016614,oxidoreductase activity, acting on CH-OH group of donors; GO:0009753,response to jasmonic acid
gene-LOC100191221	GO:0005829,cytosol; GO:0004843,thiol-dependent ubiquitin-specific protease activity; GO:0016579,protein deubiquitination; GO:0006511,ubiquitin-dependent protein catabolic process
gene-LOC100191222	GO:0009507,chloroplast; GO:0004807,triose-phosphate isomerase activity; GO:0006096,glycolytic process; GO:0019253,reductive pentose-phosphate cycle
gene-LOC100191223	GO:0016021,integral component of membrane; GO:0031902,late endosome membrane; GO:0000325,plant-type vacuole; GO:0009705,plant-type vacuole membrane; GO:0031201,SNARE complex; GO:0005773,vacuole; GO:0005484,SNAP receptor activity; GO:0000149,SNARE binding; GO:0009660,amyloplast organization; GO:0006886,intracellular protein transport; GO:0009959,negative gravitropism; GO:0010118,stomatal movement;…
gene-LOC100191224	GO:0005737,cytoplasm; GO:0005634,nucleus; GO:0019773,proteasome core complex, alpha-subunit complex; GO:0004298,threonine-type endopeptidase activity; GO:0006511,ubiquitin-dependent protein catabolic process
gene-LOC100191225	GO:0046872,metal ion binding; GO:0008237,metallopeptidase activity; GO:0071108,protein K48-linked deubiquitination; GO:0070536,protein K63-linked deubiquitination
gene-LOC100191226	GO:0005886,plasma membrane; GO:0005524,ATP binding; GO:0004675,transmembrane receptor protein serine/threonine kinase activity; GO:0007166,cell surface receptor signaling pathway; GO:0006952,defense response; GO:0006468,protein phosphorylation
gene-LOC100191227	GO:0004427,inorganic diphosphatase activity; GO:0046872,metal ion binding; GO:0016791,phosphatase activity; GO:0016462,pyrophosphatase activity; GO:0016036,cellular response to phosphate starvation; GO:0051262,protein tetramerization
gene-LOC100191228	GO:0004519,endonuclease activity; GO:0004527,exonuclease activity; GO:0046872,metal ion binding
gene-LOC100191229	GO:0005634,nucleus; GO:0046872,metal ion binding; GO:0035064,methylated histone binding; GO:0016569,covalent chromatin modification; GO:0040008,regulation of growth; GO:0006355,regulation of transcription, DNA-templated; GO:0006351,transcription, DNA-templated
gene-LOC100191230	GO:0005618,cell wall; GO:0005576,extracellular region; GO:0047911,galacturan 1,4-alpha-galacturonidase activity; GO:0004650,polygalacturonase activity; GO:0005975,carbohydrate metabolic process; GO:0071555,cell wall organization
gene-LOC100191231	GO:0003723,RNA binding
gene-LOC100191233	GO:0005634,nucleus; GO:0003700,DNA-binding transcription factor activity; GO:0044212,transcription regulatory region DNA binding; GO:0009738,abscisic acid-activated signaling pathway; GO:0006355,regulation of transcription, DNA-templated; GO:0006351,transcription, DNA-templated
gene-LOC100191234	GO:0009507,chloroplast; GO:0005829,cytosol; GO:0008837,diaminopimelate epimerase activity; GO:0009089,lysine biosynthetic process via diaminopimelate
gene-LOC100191235	GO:0005737,cytoplasm; GO:0005634,nucleus; GO:0046523,S-methyl-5-thioribose-1-phosphate isomerase activity; GO:0019509,L-methionine salvage from methylthioadenosine
gene-LOC100191237	GO:0009507,chloroplast; GO:0009570,chloroplast stroma; GO:0010319,stromule; GO:0009579,thylakoid; GO:0031977,thylakoid lumen; GO:0004462,lactoylglutathione lyase activity; GO:0046872,metal ion binding; GO:0019243,methylglyoxal catabolic process to D-lactate via S-lactoyl-glutathione; GO:0009409,response to cold
gene-LOC100191238	GO:0048046,apoplast; GO:0005618,cell wall; GO:0004553,hydrolase activity, hydrolyzing O-glycosyl compounds; GO:0016762,xyloglucan:xyloglucosyl transferase activity; GO:0042546,cell wall biogenesis; GO:0071555,cell wall organization; GO:0010411,xyloglucan metabolic process
gene-LOC100191239	GO:0005886,plasma membrane; GO:0005524,ATP binding; GO:0004675,transmembrane receptor protein serine/threonine kinase activity; GO:0007166,cell surface receptor signaling pathway; GO:0006952,defense response; GO:0006468,protein phosphorylation
gene-LOC100191240	GO:0016491,oxidoreductase activity
gene-LOC100191241	GO:0005789,endoplasmic reticulum membrane; GO:0010008,endosome membrane; GO:0016021,integral component of membrane; GO:0005886,plasma membrane; GO:0008289,lipid binding; GO:0070273,phosphatidylinositol-4-phosphate binding; GO:0009873,ethylene-activated signaling pathway; GO:1900056,negative regulation of leaf senescence; GO:0009626,plant-type hypersensitive response; GO:1900150,regulation of defe…
gene-LOC100191243	GO:0042644,chloroplast nucleoid; GO:0005634,nucleus; GO:0008408,3'-5' exonuclease activity; GO:0140078,class I DNA-(apurinic or apyrimidinic site) endonuclease activity; GO:0140080,class III/IV DNA-(apurinic or apyrimidinic site) endonuclease activity; GO:0003677,DNA binding; GO:0003906,DNA-(apurinic or apyrimidinic site) endonuclease activity; GO:0008311,double-stranded DNA 3'-5' exodeoxyribonuc…
gene-LOC100191244	GO:0005524,ATP binding; GO:0016301,kinase activity
gene-LOC100191245	GO:0005783,endoplasmic reticulum; GO:0005886,plasma membrane
gene-LOC100191246	GO:0051213,dioxygenase activity; GO:0046872,metal ion binding; GO:0009267,cellular response to starvation
gene-LOC100191247	GO:0005789,endoplasmic reticulum membrane; GO:0016021,integral component of membrane
gene-LOC100191248	GO:0048046,apoplast; GO:0009507,chloroplast; GO:0009941,chloroplast envelope; GO:0009570,chloroplast stroma; GO:0009535,chloroplast thylakoid membrane; GO:0005759,mitochondrial matrix; GO:0005739,mitochondrion; GO:0009536,plastid; GO:0009579,thylakoid; GO:0005524,ATP binding; GO:0051087,chaperone binding; GO:0005507,copper ion binding; GO:0051082,unfolded protein binding; GO:0051085,chaperone cof…
gene-LOC100191250	GO:0005829,cytosol
gene-LOC100191253	GO:0005634,nucleus; GO:0009736,cytokinin-activated signaling pathway; GO:0000160,phosphorelay signal transduction system; GO:0006355,regulation of transcription, DNA-templated; GO:0006351,transcription, DNA-templated
gene-LOC100191254	GO:0016787,hydrolase activity
gene-LOC100191255	GO:0005783,endoplasmic reticulum; GO:0005789,endoplasmic reticulum membrane; GO:0016021,integral component of membrane; GO:0005506,iron ion binding; GO:0016491,oxidoreductase activity; GO:0006633,fatty acid biosynthetic process; GO:0000038,very long-chain fatty acid metabolic process
gene-LOC100191257	GO:0005829,cytosol; GO:0005634,nucleus; GO:0003714,transcription corepressor activity; GO:0006952,defense response; GO:1903507,negative regulation of nucleic acid-templated transcription; GO:0031347,regulation of defense response; GO:2000022,regulation of jasmonic acid mediated signaling pathway; GO:0006355,regulation of transcription, DNA-templated; GO:0009611,response to wounding; GO:0006351,tr…
gene-LOC100191258	GO:0005730,nucleolus; GO:0005634,nucleus; GO:0005524,ATP binding; GO:0051731,polynucleotide 5'-hydroxyl-kinase activity; GO:0000448,cleavage in ITS2 between 5.8S rRNA and LSU-rRNA of tricistronic rRNA transcript (SSU-rRNA, 5.8S rRNA, LSU-rRNA); GO:0006364,rRNA processing
gene-LOC100191259	GO:0005576,extracellular region; GO:0016788,hydrolase activity, acting on ester bonds; GO:0016042,lipid catabolic process
gene-LOC100191260	GO:0005634,nucleus; GO:0003700,DNA-binding transcription factor activity; GO:0046982,protein heterodimerization activity; GO:0006355,regulation of transcription, DNA-templated; GO:0006351,transcription, DNA-templated
gene-LOC100191262	GO:0005634,nucleus; GO:0030154,cell differentiation; GO:0009908,flower development; GO:0043486,histone exchange; GO:0006355,regulation of transcription, DNA-templated
gene-LOC100191263	GO:0005783,endoplasmic reticulum; GO:0005634,nucleus; GO:0050662,coenzyme binding; GO:0016491,oxidoreductase activity; GO:0009555,pollen development; GO:0010584,pollen exine formation; GO:0048316,seed development; GO:0080110,sporopollenin biosynthetic process
gene-LOC100191265	GO:0005737,cytoplasm; GO:0016791,phosphatase activity; GO:0016757,transferase activity, transferring glycosyl groups; GO:0005992,trehalose biosynthetic process; GO:0070413,trehalose metabolism in response to stress
gene-LOC100191266	GO:0009507,chloroplast; GO:0005840,ribosome; GO:0019843,rRNA binding; GO:0003735,structural constituent of ribosome; GO:0006412,translation
gene-LOC100191267	GO:0016021,integral component of membrane
gene-LOC100191268	GO:0005829,cytosol; GO:0005783,endoplasmic reticulum; GO:0005524,ATP binding; GO:0016887,ATPase activity; GO:0043621,protein self-association; GO:0048767,root hair elongation; GO:0071816,tail-anchored membrane protein insertion into ER membrane
gene-LOC100191269	GO:0000421,autophagosome membrane; GO:0009504,cell plate; GO:0030136,clathrin-coated vesicle; GO:0005829,cytosol; GO:0005768,endosome; GO:0005770,late endosome; GO:0005886,plasma membrane; GO:0009920,cell plate formation involved in plant-type cell wall biogenesis
gene-LOC100191271	GO:0016021,integral component of membrane
gene-LOC100191272	GO:0009507,chloroplast; GO:0005829,cytosol; GO:0016791,phosphatase activity; GO:0008967,phosphoglycolate phosphatase activity; GO:0004674,protein serine/threonine kinase activity; GO:0016311,dephosphorylation
gene-LOC100191273	GO:0005789,endoplasmic reticulum membrane; GO:0033116,endoplasmic reticulum-Golgi intermediate compartment membrane; GO:0032580,Golgi cisterna membrane; GO:0016021,integral component of membrane; GO:0015031,protein transport; GO:0016192,vesicle-mediated transport
gene-LOC100191274	GO:0016021,integral component of membrane; GO:0005743,mitochondrial inner membrane; GO:0015141,succinate transmembrane transporter activity; GO:0015741,fumarate transport; GO:0006839,mitochondrial transport; GO:0015744,succinate transport
gene-LOC100191275	GO:0031969,chloroplast membrane; GO:0016021,integral component of membrane; GO:0016301,kinase activity; GO:0010189,vitamin E biosynthetic process
gene-LOC100191276	GO:0016021,integral component of membrane
gene-LOC100191278	GO:0005829,cytosol; GO:0005634,nucleus; GO:0017172,cysteine dioxygenase activity; GO:0046872,metal ion binding; GO:0070483,detection of hypoxia; GO:0018171,peptidyl-cysteine oxidation; GO:0001666,response to hypoxia
gene-LOC100191279	GO:0009507,chloroplast; GO:0009941,chloroplast envelope; GO:0031969,chloroplast membrane; GO:0016021,integral component of membrane; GO:0005743,mitochondrial inner membrane; GO:0005739,mitochondrion; GO:0009536,plastid; GO:0000095,S-adenosyl-L-methionine transmembrane transporter activity; GO:0009658,chloroplast organization; GO:0006839,mitochondrial transport; GO:0015805,S-adenosyl-L-methionine …
gene-LOC100191280	GO:0005737,cytoplasm; GO:0005634,nucleus; GO:0005524,ATP binding; GO:0004674,protein serine/threonine kinase activity; GO:0009738,abscisic acid-activated signaling pathway; GO:0035556,intracellular signal transduction; GO:0006468,protein phosphorylation
gene-LOC100191282	GO:0005618,cell wall; GO:0009507,chloroplast; GO:0005777,peroxisome; GO:0009506,plasmodesma; GO:0003857,3-hydroxyacyl-CoA dehydrogenase activity; GO:0008692,3-hydroxybutyryl-CoA epimerase activity; GO:0004165,dodecenoyl-CoA delta-isomerase activity; GO:0004300,enoyl-CoA hydratase activity; GO:0006635,fatty acid beta-oxidation; GO:0009908,flower development; GO:0009695,jasmonic acid biosynthetic p…
gene-LOC100191283	GO:0033855,nicotianamine aminotransferase activity; GO:0030170,pyridoxal phosphate binding; GO:0009058,biosynthetic process; GO:0006520,cellular amino acid metabolic process
gene-LOC100191284	GO:0005789,endoplasmic reticulum membrane; GO:0016021,integral component of membrane; GO:0047560,3-dehydrosphinganine reductase activity; GO:0030148,sphingolipid biosynthetic process
gene-LOC100191285	GO:0016021,integral component of membrane
gene-LOC100191286	GO:0016021,integral component of membrane
gene-LOC100191287	GO:0005783,endoplasmic reticulum; GO:0005794,Golgi apparatus; GO:0016021,integral component of membrane; GO:0008643,carbohydrate transport
gene-LOC100191288	GO:0046872,metal ion binding; GO:0008168,methyltransferase activity
gene-LOC100191289	GO:0016607,nuclear speck; GO:0005634,nucleus; GO:0003677,DNA binding; GO:0003676,nucleic acid binding; GO:0003723,RNA binding; GO:0008270,zinc ion binding; GO:0045892,negative regulation of transcription, DNA-templated; GO:0048026,positive regulation of mRNA splicing, via spliceosome; GO:0009409,response to cold; GO:0009414,response to water deprivation
gene-LOC100191290	GO:0016410,N-acyltransferase activity
gene-LOC100191291	GO:0009504,cell plate; GO:0032133,chromosome passenger complex; GO:0000780,condensed nuclear chromosome, centromeric region; GO:0005874,microtubule; GO:0031965,nuclear membrane; GO:0005730,nucleolus; GO:0005634,nucleus; GO:0009524,phragmoplast; GO:0005819,spindle; GO:0005876,spindle microtubule; GO:0051233,spindle midzone; GO:0000922,spindle pole; GO:0005524,ATP binding; GO:0035175,histone kinase…
gene-LOC100191292	GO:0016021,integral component of membrane; GO:0046872,metal ion binding; GO:0061630,ubiquitin protein ligase activity; GO:0004842,ubiquitin-protein transferase activity; GO:0043161,proteasome-mediated ubiquitin-dependent protein catabolic process
gene-LOC100191293	GO:0043231,intracellular membrane-bounded organelle; GO:0004519,endonuclease activity; GO:0003723,RNA binding; GO:0009451,RNA modification
gene-LOC100191294	GO:0004222,metalloendopeptidase activity; GO:0071586,CAAX-box protein processing
gene-LOC100191295	GO:0005739,mitochondrion; GO:0005524,ATP binding; GO:0005507,copper ion binding; GO:0003723,RNA binding; GO:0003697,single-stranded DNA binding; GO:0016554,cytidine to uridine editing; GO:0080156,mitochondrial mRNA modification; GO:0006397,mRNA processing; GO:0009409,response to cold
gene-LOC100191296	GO:0015031,protein transport
gene-LOC100191297	GO:0005634,nucleus; GO:0003725,double-stranded RNA binding; GO:0004525,ribonuclease III activity; GO:0031054,pre-miRNA processing; GO:0031053,primary miRNA processing; GO:0030422,production of siRNA involved in RNA interference; GO:0090502,RNA phosphodiester bond hydrolysis, endonucleolytic
gene-LOC100191298	GO:0005795,Golgi stack; GO:0016020,membrane; GO:0005886,plasma membrane; GO:0005525,GTP binding; GO:0015031,protein transport; GO:0046686,response to cadmium ion; GO:0007264,small GTPase mediated signal transduction; GO:0016192,vesicle-mediated transport
gene-LOC100191299	GO:0080008,Cul4-RING E3 ubiquitin ligase complex; GO:0005778,peroxisomal membrane; GO:0006625,protein targeting to peroxisome
gene-LOC100191300	GO:0005739,mitochondrion; GO:0009055,electron transfer activity; GO:0050220,prostaglandin-E synthase activity; GO:0015035,protein disulfide oxidoreductase activity; GO:0045454,cell redox homeostasis
gene-LOC100191301	GO:0005829,cytosol; GO:0018580,nitronate monooxygenase activity; GO:0046686,response to cadmium ion; GO:0009610,response to symbiotic fungus
gene-LOC100191302	GO:0016021,integral component of membrane; GO:0005743,mitochondrial inner membrane; GO:0006839,mitochondrial transport; GO:0055085,transmembrane transport
gene-LOC100191303	GO:0005618,cell wall; GO:0005576,extracellular region; GO:0016020,membrane; GO:0009664,plant-type cell wall organization
gene-LOC100191304	GO:0005576,extracellular region; GO:0020037,heme binding; GO:0046872,metal ion binding; GO:0004601,peroxidase activity; GO:0042744,hydrogen peroxide catabolic process; GO:0006979,response to oxidative stress
gene-LOC100191305	GO:0005737,cytoplasm; GO:0005634,nucleus; GO:0019005,SCF ubiquitin ligase complex; GO:0005516,calmodulin binding; GO:0004402,histone acetyltransferase activity; GO:0003712,transcription coregulator activity; GO:0031625,ubiquitin protein ligase binding; GO:0008270,zinc ion binding; GO:0009738,abscisic acid-activated signaling pathway; GO:0009734,auxin-activated signaling pathway; GO:0007623,circad…
gene-LOC100191306	GO:0003676,nucleic acid binding; GO:0008270,zinc ion binding
gene-LOC100191307	GO:0005576,extracellular region; GO:0016788,hydrolase activity, acting on ester bonds; GO:0016042,lipid catabolic process
gene-LOC100191308	GO:0016567,protein ubiquitination
gene-LOC100191311	GO:0005768,endosome; GO:0005794,Golgi apparatus; GO:0016021,integral component of membrane; GO:0031201,SNARE complex; GO:0005802,trans-Golgi network; GO:0005484,SNAP receptor activity; GO:0000149,SNARE binding; GO:0007030,Golgi organization; GO:0006886,intracellular protein transport; GO:0009306,protein secretion; GO:0007034,vacuolar transport; GO:0048278,vesicle docking; GO:0006906,vesicle fusion
gene-LOC100191312	GO:0019135,deoxyhypusine monooxygenase activity; GO:0046872,metal ion binding; GO:0008612,peptidyl-lysine modification to peptidyl-hypusine
gene-LOC100191313	GO:0005634,nucleus; GO:0003684,damaged DNA binding; GO:0006289,nucleotide-excision repair; GO:0043161,proteasome-mediated ubiquitin-dependent protein catabolic process
gene-LOC100191314	GO:0005618,cell wall; GO:0009507,chloroplast; GO:0005829,cytosol; GO:0022625,cytosolic large ribosomal subunit; GO:0022626,cytosolic ribosome; GO:0016020,membrane; GO:0005730,nucleolus; GO:0005886,plasma membrane; GO:0009506,plasmodesma; GO:0042788,polysomal ribosome; GO:0005773,vacuole; GO:0003729,mRNA binding; GO:0003735,structural constituent of ribosome; GO:0002181,cytoplasmic translation
gene-LOC100191315	GO:0016021,integral component of membrane
gene-LOC100191316	GO:0016021,integral component of membrane; GO:0005743,mitochondrial inner membrane; GO:0015181,arginine transmembrane transporter activity; GO:0005290,L-histidine transmembrane transporter activity; GO:0015189,L-lysine transmembrane transporter activity; GO:0000066,NA; GO:0006839,mitochondrial transport
gene-LOC100191317	GO:0005840,ribosome
gene-LOC100191319	GO:0005737,cytoplasm; GO:0005634,nucleus; GO:0004843,thiol-dependent ubiquitin-specific protease activity; GO:0016579,protein deubiquitination; GO:0010016,shoot system morphogenesis; GO:0006511,ubiquitin-dependent protein catabolic process
gene-LOC100191320	GO:0046658,anchored component of plasma membrane; GO:0005618,cell wall; GO:0005832,chaperonin-containing T-complex; GO:0005829,cytosol; GO:0005524,ATP binding; GO:0044183,protein binding involved in protein folding; GO:0051082,unfolded protein binding; GO:0006458,'de novo' protein folding; GO:0061077,chaperone-mediated protein folding
gene-LOC100191321	GO:0009815,1-aminocyclopropane-1-carboxylate oxidase activity; GO:0031418,L-ascorbic acid binding; GO:0046872,metal ion binding; GO:0009693,ethylene biosynthetic process; GO:0009835,fruit ripening
gene-LOC100191322	GO:0005759,mitochondrial matrix; GO:0005739,mitochondrion; GO:0005507,copper ion binding; GO:0009055,electron transfer activity; GO:0050660,flavin adenine dinucleotide binding; GO:0016491,oxidoreductase activity; GO:0033539,fatty acid beta-oxidation using acyl-CoA dehydrogenase
gene-LOC100191323	GO:0005618,cell wall; GO:0005576,extracellular region; GO:0004857,enzyme inhibitor activity; GO:0030154,cell differentiation; GO:0048833,specification of floral organ number
gene-LOC100191325	GO:0016021,integral component of membrane; GO:0004252,serine-type endopeptidase activity; GO:0043130,ubiquitin binding
gene-LOC100191326	GO:0009507,chloroplast; GO:0009536,plastid; GO:0005524,ATP binding; GO:0000287,magnesium ion binding; GO:0004765,shikimate kinase activity; GO:0009073,aromatic amino acid family biosynthetic process; GO:0009423,chorismate biosynthetic process; GO:0019632,shikimate metabolic process
gene-LOC100191327	GO:0016021,integral component of membrane
gene-LOC100191328	GO:0016021,integral component of membrane; GO:0016717,oxidoreductase activity, acting on paired donors, with oxidation of a pair of donors resulting in the reduction of molecular oxygen to two molecules of water; GO:0006636,unsaturated fatty acid biosynthetic process
gene-LOC100191329	GO:0006364,rRNA processing
gene-LOC100191330	GO:0000418,RNA polymerase IV complex; GO:0000419,RNA polymerase V complex; GO:0005634,nucleus; GO:0003899,DNA-directed 5'-3' RNA polymerase activity; GO:0000166,nucleotide binding; GO:0010426,DNA methylation on cytosine within a CHH sequence; GO:0016246,RNA interference; GO:0006351,transcription, DNA-templated
gene-LOC100191332	GO:0008168,methyltransferase activity; GO:0003676,nucleic acid binding
gene-LOC100191333	GO:0016787,hydrolase activity; GO:0016740,transferase activity; GO:0016042,lipid catabolic process
gene-LOC100191334	GO:0005737,cytoplasm; GO:0004073,aspartate-semialdehyde dehydrogenase activity; GO:0003942,N-acetyl-gamma-glutamyl-phosphate reductase activity; GO:0051287,NAD binding; GO:0050661,NADP binding; GO:0046983,protein dimerization activity; GO:0009097,isoleucine biosynthetic process; GO:0009089,lysine biosynthetic process via diaminopimelate; GO:0009086,methionine biosynthetic process; GO:0009088,thre…
gene-LOC100191335	GO:0005783,endoplasmic reticulum; GO:0016021,integral component of membrane; GO:0005741,mitochondrial outer membrane; GO:0009505,plant-type cell wall; GO:0005886,plasma membrane; GO:0004128,cytochrome-b5 reductase activity, acting on NAD(P)H; GO:0022900,electron transport chain
gene-LOC100191336	GO:0016021,integral component of membrane; GO:0030246,carbohydrate binding
gene-LOC100191337	GO:0005737,cytoplasm; GO:0005524,ATP binding; GO:0016887,ATPase activity
gene-LOC100191338	GO:0050662,coenzyme binding; GO:0016491,oxidoreductase activity; GO:0009813,flavonoid biosynthetic process
gene-LOC100191339	GO:0005737,cytoplasm; GO:0033760,2'-deoxymugineic-acid 2'-dioxygenase activity; GO:0031418,L-ascorbic acid binding; GO:0046872,metal ion binding; GO:0010041,response to iron(III) ion
gene-LOC100191340	GO:0016021,integral component of membrane
gene-LOC100191341	GO:0016021,integral component of membrane; GO:0008061,chitin binding; GO:0016787,hydrolase activity; GO:0005975,carbohydrate metabolic process
gene-LOC100191342	GO:0005634,nucleus; GO:0003677,DNA binding; GO:0046872,metal ion binding; GO:0046982,protein heterodimerization activity; GO:0009851,auxin biosynthetic process; GO:0009734,auxin-activated signaling pathway; GO:0007275,multicellular organism development; GO:0045893,positive regulation of transcription, DNA-templated
gene-LOC100191343	GO:0016021,integral component of membrane; GO:0004872,NA; GO:0009725,response to hormone
gene-LOC100191344	GO:0016787,hydrolase activity
gene-LOC100191345	GO:0016021,integral component of membrane; GO:0008233,peptidase activity; GO:0006465,signal peptide processing
gene-LOC100191347	GO:0005737,cytoplasm; GO:0005634,nucleus; GO:0016787,hydrolase activity; GO:0009691,cytokinin biosynthetic process; GO:0048509,regulation of meristem development
gene-LOC100191348	GO:0009507,chloroplast; GO:0005829,cytosol; GO:0005739,mitochondrion; GO:0050897,cobalt ion binding; GO:0019148,D-cysteine desulfhydrase activity; GO:0019447,D-cysteine catabolic process; GO:0009693,ethylene biosynthetic process; GO:0046686,response to cadmium ion
gene-LOC100191349	GO:0005794,Golgi apparatus; GO:0000139,Golgi membrane; GO:0016021,integral component of membrane; GO:0015297,antiporter activity; GO:0005457,GDP-fucose transmembrane transporter activity; GO:0008643,carbohydrate transport; GO:0015780,nucleotide-sugar transmembrane transport
gene-LOC100191350	GO:0016491,oxidoreductase activity
gene-LOC100191354	GO:0016021,integral component of membrane; GO:0005743,mitochondrial inner membrane; GO:0015228,coenzyme A transmembrane transporter activity; GO:1990559,mitochondrial coenzyme A transmembrane transport
gene-LOC100191355	GO:0005737,cytoplasm; GO:0015630,microtubule cytoskeleton; GO:0008017,microtubule binding; GO:0003723,RNA binding; GO:0006952,defense response; GO:0051224,negative regulation of protein transport; GO:0010497,plasmodesmata-mediated intercellular transport; GO:0002230,positive regulation of defense response to virus by host; GO:0051493,regulation of cytoskeleton organization; GO:0046740,transport o…
gene-LOC100191356	GO:0005779,integral component of peroxisomal membrane; GO:0005743,mitochondrial inner membrane; GO:0005777,peroxisome; GO:0015217,ADP transmembrane transporter activity; GO:0015297,antiporter activity; GO:0005347,ATP transmembrane transporter activity; GO:0015866,ADP transport; GO:0015867,ATP transport; GO:0006635,fatty acid beta-oxidation; GO:0080024,indolebutyric acid metabolic process; GO:0006…
gene-LOC100191357	GO:0005737,cytoplasm; GO:0005874,microtubule; GO:0003924,GTPase activity; GO:0051301,cell division; GO:0009658,chloroplast organization; GO:0032502,developmental process; GO:0009793,embryo development ending in seed dormancy; GO:0044376,NA; GO:1990022,NA; GO:1902182,shoot apical meristem development
gene-LOC100191358	GO:0000815,ESCRT III complex; GO:0005886,plasma membrane; GO:0015031,protein transport; GO:0007034,vacuolar transport
gene-LOC100191359	GO:0004190,aspartic-type endopeptidase activity; GO:0004519,endonuclease activity; GO:0046872,metal ion binding; GO:0003676,nucleic acid binding; GO:0003964,RNA-directed DNA polymerase activity; GO:0015074,DNA integration; GO:0006310,DNA recombination
gene-LOC100191362	GO:0005783,endoplasmic reticulum; GO:0005789,endoplasmic reticulum membrane; GO:0071782,endoplasmic reticulum tubular network; GO:0071458,integral component of cytoplasmic side of endoplasmic reticulum membrane; GO:0005886,plasma membrane; GO:0005773,vacuole; GO:0071786,endoplasmic reticulum tubular network organization
gene-LOC100191363	GO:0000139,Golgi membrane; GO:0005886,plasma membrane; GO:0006656,phosphatidylcholine biosynthetic process; GO:0015031,protein transport
gene-LOC100191364	GO:0005737,cytoplasm; GO:0005739,mitochondrion; GO:0005634,nucleus; GO:0016818,hydrolase activity, acting on acid anhydrides, in phosphorus-containing anhydrides; GO:0046872,metal ion binding
gene-LOC100191365	GO:0005829,cytosol; GO:0005524,ATP binding; GO:0016301,kinase activity; GO:0000287,magnesium ion binding; GO:0030955,potassium ion binding; GO:0004743,pyruvate kinase activity; GO:0006096,glycolytic process
gene-LOC100191366	GO:0005768,endosome; GO:0016459,myosin complex; GO:0005886,plasma membrane; GO:0009506,plasmodesma; GO:0003779,actin binding; GO:0005524,ATP binding; GO:0005516,calmodulin binding; GO:0003774,motor activity; GO:0030048,actin filament-based movement; GO:0006897,endocytosis
gene-LOC100191367	GO:0005739,mitochondrion; GO:0005524,ATP binding; GO:0008094,DNA-dependent ATPase activity; GO:0003690,double-stranded DNA binding; GO:0000400,four-way junction DNA binding; GO:0000150,recombinase activity; GO:0003697,single-stranded DNA binding; GO:0000730,DNA recombinase assembly; GO:0006312,mitotic recombination; GO:0010212,response to ionizing radiation; GO:0042148,strand invasion
gene-LOC100191368	GO:0009507,chloroplast; GO:0022625,cytosolic large ribosomal subunit; GO:0022626,cytosolic ribosome; GO:0016020,membrane; GO:0042788,polysomal ribosome; GO:0003729,mRNA binding; GO:0003723,RNA binding; GO:0003735,structural constituent of ribosome; GO:0002181,cytoplasmic translation; GO:0000463,maturation of LSU-rRNA from tricistronic rRNA transcript (SSU-rRNA, 5.8S rRNA, LSU-rRNA)
gene-LOC100191370	GO:0016021,integral component of membrane; GO:0005886,plasma membrane; GO:0005524,ATP binding; GO:0004672,protein kinase activity
gene-LOC100191373	GO:0005768,endosome; GO:0005794,Golgi apparatus; GO:0016021,integral component of membrane; GO:0005802,trans-Golgi network; GO:0010222,stem vascular tissue pattern formation
gene-LOC100191374	GO:0005769,early endosome; GO:0016021,integral component of membrane; GO:0016020,membrane; GO:0005886,plasma membrane; GO:0015095,magnesium ion transmembrane transporter activity; GO:0015693,magnesium ion transport
gene-LOC100191375	GO:0009706,chloroplast inner membrane; GO:0009535,chloroplast thylakoid membrane; GO:0010027,thylakoid membrane organization; GO:0016032,viral process
gene-LOC100191376	GO:0008180,COP9 signalosome; GO:0005829,cytosol; GO:0010387,COP9 signalosome assembly; GO:0007275,multicellular organism development; GO:0000338,protein deneddylation; GO:0009585,red, far-red light phototransduction
gene-LOC100191377	GO:0004164,diphthine synthase activity; GO:0017183,peptidyl-diphthamide biosynthetic process from peptidyl-histidine
gene-LOC100191380	GO:0031225,anchored component of membrane; GO:0046658,anchored component of plasma membrane; GO:0005618,cell wall; GO:0005576,extracellular region; GO:0005886,plasma membrane; GO:0042973,glucan endo-1,3-beta-D-glucosidase activity; GO:0004553,hydrolase activity, hydrolyzing O-glycosyl compounds; GO:0030247,polysaccharide binding; GO:0005975,carbohydrate metabolic process; GO:0071555,cell wall org…
gene-LOC100191381	GO:0009507,chloroplast; GO:0030529,NA; GO:0003723,RNA binding; GO:0006397,mRNA processing
gene-LOC100191382	GO:0000815,ESCRT III complex; GO:0005886,plasma membrane; GO:0015031,protein transport; GO:0007034,vacuolar transport
gene-LOC100191383	GO:0046872,metal ion binding; GO:0004722,protein serine/threonine phosphatase activity
gene-LOC100191385	GO:0009507,chloroplast; GO:0004519,endonuclease activity; GO:0003723,RNA binding; GO:0009451,RNA modification
gene-LOC100191386	GO:0009941,chloroplast envelope; GO:0009570,chloroplast stroma; GO:0043231,intracellular membrane-bounded organelle; GO:0004519,endonuclease activity; GO:0003723,RNA binding; GO:0009658,chloroplast organization; GO:0031425,chloroplast RNA processing; GO:0009451,RNA modification
gene-LOC100191387	GO:0005829,cytosol; GO:0000159,protein phosphatase type 2A complex; GO:0019888,protein phosphatase regulator activity; GO:0032502,developmental process; GO:0000278,mitotic cell cycle; GO:0070262,peptidyl-serine dephosphorylation
gene-LOC100191388	GO:0005829,cytosol
gene-LOC100191389	GO:0005634,nucleus; GO:0046872,metal ion binding; GO:0004721,phosphoprotein phosphatase activity
gene-LOC100191390	GO:0005578,NA; GO:0046556,alpha-L-arabinofuranosidase activity; GO:0009044,xylan 1,4-beta-xylosidase activity; GO:0045493,xylan catabolic process
gene-LOC100191392	GO:0005618,cell wall; GO:0005856,cytoskeleton; GO:0005829,cytosol; GO:0000145,exocyst; GO:0005576,extracellular region; GO:0048471,perinuclear region of cytoplasm; GO:0009524,phragmoplast; GO:0001927,exocyst assembly; GO:0051601,exocyst localization
gene-LOC100191393	GO:0043231,intracellular membrane-bounded organelle; GO:0004519,endonuclease activity; GO:0003723,RNA binding; GO:0008270,zinc ion binding; GO:0009451,RNA modification
gene-LOC100191394	GO:0016757,transferase activity, transferring glycosyl groups
gene-LOC100191395	GO:0005634,nucleus; GO:0055105,ubiquitin-protein transferase inhibitor activity; GO:0007275,multicellular organism development
gene-LOC100191396	GO:0036513,Derlin-1 retrotranslocation complex; GO:0005783,endoplasmic reticulum; GO:0016021,integral component of membrane; GO:0016020,membrane; GO:0046872,metal ion binding; GO:1904264,NA; GO:0044390,ubiquitin-like protein conjugating enzyme binding; GO:0004842,ubiquitin-protein transferase activity; GO:0071712,ER-associated misfolded protein catabolic process; GO:0032527,protein exit from endo…
gene-LOC100191397	GO:0043231,intracellular membrane-bounded organelle; GO:0004519,endonuclease activity; GO:0003723,RNA binding; GO:0009451,RNA modification
gene-LOC100191398	GO:0016021,integral component of membrane; GO:0016020,membrane; GO:0015079,potassium ion transmembrane transporter activity
gene-LOC100191400	GO:0048046,apoplast; GO:0005618,cell wall; GO:0009505,plant-type cell wall; GO:0004190,aspartic-type endopeptidase activity; GO:0000166,nucleotide binding; GO:0030163,protein catabolic process; GO:0006508,proteolysis; GO:0043067,regulation of programmed cell death; GO:0009627,systemic acquired resistance
gene-LOC100191402	GO:0000139,Golgi membrane; GO:0016021,integral component of membrane; GO:0005351,carbohydrate:proton symporter activity
gene-LOC100191404	GO:0005618,cell wall; GO:0005856,cytoskeleton; GO:0005829,cytosol; GO:0000145,exocyst; GO:0005576,extracellular region; GO:0009524,phragmoplast; GO:0005886,plasma membrane; GO:0006887,exocytosis
gene-LOC100191405	GO:0005737,cytoplasm; GO:0005634,nucleus; GO:0019005,SCF ubiquitin ligase complex; GO:0031625,ubiquitin protein ligase binding; GO:0043161,proteasome-mediated ubiquitin-dependent protein catabolic process; GO:0042787,NA; GO:0030162,regulation of proteolysis
gene-LOC100191406	GO:0046872,metal ion binding; GO:0004842,ubiquitin-protein transferase activity; GO:0042742,defense response to bacterium; GO:0051865,protein autoubiquitination
gene-LOC100191407	GO:0005623,cell; GO:0009734,auxin-activated signaling pathway; GO:0009742,brassinosteroid mediated signaling pathway; GO:0045454,cell redox homeostasis; GO:0010305,leaf vascular tissue pattern formation; GO:0006970,response to osmotic stress
gene-LOC100191408	GO:0005739,mitochondrion; GO:0005524,ATP binding; GO:0051082,unfolded protein binding; GO:0006457,protein folding
gene-LOC100191409	GO:0005886,plasma membrane; GO:0016567,protein ubiquitination
gene-LOC100191410	GO:0003899,DNA-directed 5'-3' RNA polymerase activity
gene-LOC100191411	GO:0005886,plasma membrane; GO:0005524,ATP binding; GO:0031072,heat shock protein binding; GO:0046872,metal ion binding; GO:0051082,unfolded protein binding; GO:0006457,protein folding; GO:0009408,response to heat
gene-LOC100191412	GO:0005634,nucleus; GO:0003700,DNA-binding transcription factor activity; GO:0043565,sequence-specific DNA binding; GO:0009736,cytokinin-activated signaling pathway; GO:0000160,phosphorelay signal transduction system; GO:0045893,positive regulation of transcription, DNA-templated; GO:0006351,transcription, DNA-templated
gene-LOC100191413	GO:0016021,integral component of membrane; GO:0016757,transferase activity, transferring glycosyl groups; GO:0006004,fucose metabolic process
gene-LOC100191414	GO:0046872,metal ion binding; GO:0004722,protein serine/threonine phosphatase activity
gene-LOC100191415	GO:0016021,integral component of membrane
gene-LOC100191416	GO:0005576,extracellular region; GO:0016985,mannan endo-1,4-beta-mannosidase activity; GO:0046355,mannan catabolic process
gene-LOC100191417	GO:0043231,intracellular membrane-bounded organelle; GO:0004519,endonuclease activity; GO:0003723,RNA binding; GO:0009451,RNA modification
gene-LOC100191418	GO:0048046,apoplast; GO:0005618,cell wall; GO:0009507,chloroplast; GO:0009505,plant-type cell wall; GO:0009506,plasmodesma; GO:0005578,NA; GO:0004553,hydrolase activity, hydrolyzing O-glycosyl compounds; GO:0005975,carbohydrate metabolic process
gene-LOC100191419	GO:0003677,DNA binding; GO:0008270,zinc ion binding
gene-LOC100191420	GO:0016021,integral component of membrane; GO:0005886,plasma membrane; GO:0005524,ATP binding; GO:0004672,protein kinase activity
gene-LOC100191422	GO:0005737,cytoplasm; GO:0005829,cytosol; GO:0012505,endomembrane system; GO:0005634,nucleus; GO:0005886,plasma membrane; GO:0005524,ATP binding; GO:0051020,GTPase binding; GO:0016301,kinase activity; GO:0004675,transmembrane receptor protein serine/threonine kinase activity; GO:0007166,cell surface receptor signaling pathway; GO:0071369,cellular response to ethylene stimulus; GO:0009814,defense …
gene-LOC100191423	GO:0009507,chloroplast; GO:0009570,chloroplast stroma; GO:0009535,chloroplast thylakoid membrane; GO:0080124,pheophytinase activity; GO:0015996,chlorophyll catabolic process
gene-LOC100191424	GO:0016787,hydrolase activity
gene-LOC100191425	GO:0016021,integral component of membrane; GO:0005886,plasma membrane; GO:0005775,vacuolar lumen; GO:0005774,vacuolar membrane; GO:0005524,ATP binding; GO:0042626,ATPase activity, coupled to transmembrane movement of substances; GO:0042891,antibiotic transport; GO:0007034,vacuolar transport
gene-LOC100191426	GO:0006511,ubiquitin-dependent protein catabolic process
gene-LOC100191429	GO:0005737,cytoplasm; GO:0005634,nucleus; GO:0005524,ATP binding; GO:0004707,MAP kinase activity; GO:0010468,regulation of gene expression
gene-LOC100191430	GO:0005576,extracellular region
gene-LOC100191431	GO:0016787,hydrolase activity
gene-LOC100191432	GO:0005737,cytoplasm; GO:0005634,nucleus; GO:0003729,mRNA binding; GO:0046914,transition metal ion binding; GO:0046916,cellular transition metal ion homeostasis; GO:0030001,metal ion transport; GO:0006397,mRNA processing; GO:0051028,mRNA transport; GO:0000184,nuclear-transcribed mRNA catabolic process, nonsense-mediated decay; GO:0006417,regulation of translation; GO:0008380,RNA splicing
gene-LOC100191433	GO:0005737,cytoplasm; GO:0005886,plasma membrane; GO:0090406,pollen tube; GO:0005089,Rho guanyl-nucleotide exchange factor activity; GO:0009793,embryo development ending in seed dormancy; GO:0009860,pollen tube growth; GO:0080092,regulation of pollen tube growth
gene-LOC100191434	GO:0009507,chloroplast; GO:0005886,plasma membrane; GO:0007623,circadian rhythm; GO:0009737,response to abscisic acid; GO:0009409,response to cold; GO:0009644,response to high light intensity; GO:0009651,response to salt stress; GO:0009414,response to water deprivation
gene-LOC100191435	GO:0009982,pseudouridine synthase activity; GO:0003723,RNA binding; GO:0001522,pseudouridine synthesis
gene-LOC100191436	GO:0009507,chloroplast; GO:0004325,ferrochelatase activity; GO:0006783,heme biosynthetic process
gene-LOC100191437	GO:0016021,integral component of membrane; GO:0005770,late endosome; GO:0015299,solute:proton antiporter activity; GO:0015672,monovalent inorganic cation transport; GO:0006813,potassium ion transport; GO:0006885,regulation of pH
gene-LOC100191438	GO:0016021,integral component of membrane; GO:0005524,ATP binding; GO:0005509,calcium ion binding; GO:0030247,polysaccharide binding; GO:0004674,protein serine/threonine kinase activity; GO:0007166,cell surface receptor signaling pathway
gene-LOC100191439	GO:0016021,integral component of membrane; GO:0005524,ATP binding; GO:0005509,calcium ion binding; GO:0030247,polysaccharide binding; GO:0004674,protein serine/threonine kinase activity; GO:0007166,cell surface receptor signaling pathway
gene-LOC100191441	GO:0005634,nucleus; GO:0003677,DNA binding; GO:0046872,metal ion binding; GO:0006355,regulation of transcription, DNA-templated; GO:0006351,transcription, DNA-templated
gene-LOC100191442	GO:0005737,cytoplasm; GO:0005829,cytosol; GO:0005634,nucleus; GO:0004842,ubiquitin-protein transferase activity; GO:0006952,defense response; GO:0009908,flower development; GO:0031348,negative regulation of defense response; GO:0043069,negative regulation of programmed cell death; GO:0016567,protein ubiquitination; GO:0048586,regulation of long-day photoperiodism, flowering
gene-LOC100191443	GO:0005634,nucleus; GO:0048188,Set1C/COMPASS complex; GO:0042393,histone binding; GO:0008168,methyltransferase activity; GO:0010228,vegetative to reproductive phase transition of meristem
gene-LOC100191444	GO:0016021,integral component of membrane
gene-LOC100191445	GO:0005759,mitochondrial matrix; GO:0042802,identical protein binding; GO:0004587,ornithine-oxo-acid transaminase activity; GO:0030170,pyridoxal phosphate binding; GO:0008270,zinc ion binding; GO:0019544,arginine catabolic process to glutamate; GO:0009816,defense response to bacterium, incompatible interaction; GO:0042538,hyperosmotic salinity response; GO:0055129,L-proline biosynthetic process; …
gene-LOC100191446	GO:0005737,cytoplasm; GO:0005634,nucleus; GO:0005886,plasma membrane; GO:0005524,ATP binding; GO:0016301,kinase activity; GO:0004674,protein serine/threonine kinase activity; GO:0035556,intracellular signal transduction
gene-LOC100191447	GO:0005737,cytoplasm; GO:0005730,nucleolus; GO:0005524,ATP binding; GO:0004004,ATP-dependent RNA helicase activity; GO:0003723,RNA binding; GO:0010501,RNA secondary structure unwinding
gene-LOC100191448	GO:0003700,DNA-binding transcription factor activity
gene-LOC100191449	GO:0005576,extracellular region; GO:0003993,acid phosphatase activity; GO:0046872,metal ion binding; GO:0009846,pollen germination; GO:0009845,seed germination
gene-LOC100191450	GO:0055028,cortical microtubule; GO:0005874,microtubule; GO:0005634,nucleus; GO:0009524,phragmoplast; GO:0009574,preprophase band; GO:0008017,microtubule binding; GO:0000911,cytokinesis by cell plate formation; GO:0052096,formation by symbiont of syncytium involving giant cell for nutrient acquisition from host; GO:0000226,microtubule cytoskeleton organization; GO:0046785,microtubule polymerizati…
gene-LOC100191451	GO:0000139,Golgi membrane; GO:0016021,integral component of membrane; GO:0008375,acetylglucosaminyltransferase activity; GO:0015020,glucuronosyltransferase activity
gene-LOC100191452	GO:0005794,Golgi apparatus; GO:0016021,integral component of membrane; GO:0000325,plant-type vacuole; GO:0009705,plant-type vacuole membrane; GO:0005774,vacuolar membrane; GO:0005773,vacuole; GO:0042936,NA; GO:0015334,high-affinity oligopeptide transmembrane transporter activity; GO:0015197,NA; GO:0042937,tripeptide transmembrane transporter activity; GO:0042938,dipeptide transport; GO:0015833,pe…
gene-LOC100191453	GO:0009507,chloroplast; GO:0005747,mitochondrial respiratory chain complex I; GO:0051537,2 iron, 2 sulfur cluster binding; GO:0051539,4 iron, 4 sulfur cluster binding; GO:0009055,electron transfer activity; GO:0046872,metal ion binding; GO:0008137,NADH dehydrogenase (ubiquinone) activity; GO:0042773,ATP synthesis coupled electron transport; GO:0006979,response to oxidative stress
gene-LOC100191454	GO:0016021,integral component of membrane; GO:0004650,polygalacturonase activity; GO:0005975,carbohydrate metabolic process
gene-LOC100191455	GO:0016021,integral component of membrane; GO:0005886,plasma membrane; GO:0009506,plasmodesma; GO:0090448,glucosinolate:proton symporter activity; GO:1901349,glucosinolate transport; GO:0090449,phloem glucosinolate loading; GO:0080167,response to karrikin
gene-LOC100191456	GO:0005832,chaperonin-containing T-complex; GO:0005829,cytosol; GO:0005524,ATP binding; GO:0044183,protein binding involved in protein folding; GO:0051082,unfolded protein binding; GO:0006458,'de novo' protein folding; GO:0061077,chaperone-mediated protein folding; GO:0046686,response to cadmium ion
gene-LOC100191457	GO:0005634,nucleus; GO:0003677,DNA binding; GO:0046872,metal ion binding; GO:0006355,regulation of transcription, DNA-templated; GO:0006351,transcription, DNA-templated
gene-LOC100191458	GO:0030127,COPII vesicle coat; GO:0000139,Golgi membrane; GO:0008270,zinc ion binding; GO:0090114,COPII-coated vesicle budding; GO:0006886,intracellular protein transport
gene-LOC100191459	GO:0009504,cell plate; GO:0005737,cytoplasm; GO:0005874,microtubule; GO:0009524,phragmoplast; GO:0005525,GTP binding; GO:0003924,GTPase activity; GO:0008017,microtubule binding; GO:0000911,cytokinesis by cell plate formation; GO:0000266,mitochondrial fission
gene-LOC100191460	GO:0005737,cytoplasm; GO:0008964,phosphoenolpyruvate carboxylase activity; GO:0015977,carbon fixation; GO:0015979,photosynthesis; GO:0006099,tricarboxylic acid cycle
gene-LOC100191462	GO:0005829,cytosol; GO:0005634,nucleus; GO:0017091,AU-rich element binding; GO:0003729,mRNA binding; GO:0009738,abscisic acid-activated signaling pathway; GO:0008219,cell death; GO:0006952,defense response; GO:0009693,ethylene biosynthetic process; GO:0010150,leaf senescence; GO:0048255,mRNA stabilization
gene-LOC100191463	GO:0005737,cytoplasm; GO:0003983,UTP:glucose-1-phosphate uridylyltransferase activity; GO:0006011,UDP-glucose metabolic process
gene-LOC100191464	GO:0012505,endomembrane system; GO:0016021,integral component of membrane; GO:0005886,plasma membrane; GO:0005524,ATP binding; GO:0004675,transmembrane receptor protein serine/threonine kinase activity; GO:0006468,protein phosphorylation
gene-LOC100191465	GO:0016567,protein ubiquitination
gene-LOC100191466	GO:0005622,intracellular; GO:0005886,plasma membrane; GO:0004435,phosphatidylinositol phospholipase C activity; GO:0004871,NA; GO:0035556,intracellular signal transduction; GO:0016042,lipid catabolic process
gene-LOC100191467	GO:0008270,zinc ion binding
gene-LOC100191468	GO:0005829,cytosol; GO:0009506,plasmodesma; GO:0005524,ATP binding; GO:0004674,protein serine/threonine kinase activity; GO:0004712,protein serine/threonine/tyrosine kinase activity; GO:0004713,protein tyrosine kinase activity; GO:0009789,positive regulation of abscisic acid-activated signaling pathway; GO:0046777,protein autophosphorylation; GO:0006468,protein phosphorylation; GO:0009737,respons…
gene-LOC100191469	GO:0005777,peroxisome; GO:0009506,plasmodesma; GO:0003995,acyl-CoA dehydrogenase activity; GO:0003997,acyl-CoA oxidase activity; GO:0071949,FAD binding; GO:0050660,flavin adenine dinucleotide binding; GO:0006635,fatty acid beta-oxidation; GO:0033539,fatty acid beta-oxidation using acyl-CoA dehydrogenase; GO:0009695,jasmonic acid biosynthetic process; GO:0001676,long-chain fatty acid metabolic pro…
gene-LOC100191470	GO:0005634,nucleus; GO:0005524,ATP binding; GO:0032502,developmental process; GO:0006355,regulation of transcription, DNA-templated; GO:0006351,transcription, DNA-templated
gene-LOC100191471	GO:0031225,anchored component of membrane; GO:0046658,anchored component of plasma membrane; GO:0005886,plasma membrane; GO:0042973,glucan endo-1,3-beta-D-glucosidase activity; GO:0004553,hydrolase activity, hydrolyzing O-glycosyl compounds; GO:0030247,polysaccharide binding; GO:0005975,carbohydrate metabolic process; GO:0006952,defense response
gene-LOC100191472	GO:0043231,intracellular membrane-bounded organelle; GO:0005739,mitochondrion; GO:0004519,endonuclease activity; GO:0003723,RNA binding; GO:0009451,RNA modification
gene-LOC100191473	GO:0016021,integral component of membrane; GO:0005886,plasma membrane; GO:0009506,plasmodesma; GO:0005773,vacuole; GO:0005524,ATP binding; GO:0030246,carbohydrate binding; GO:0004674,protein serine/threonine kinase activity; GO:0004675,transmembrane receptor protein serine/threonine kinase activity; GO:0031625,ubiquitin protein ligase binding; GO:0006468,protein phosphorylation; GO:0048544,recogn…
gene-LOC100191474	GO:0016020,membrane; GO:0005730,nucleolus; GO:0031298,replication fork protection complex; GO:0003677,DNA binding; GO:0003917,DNA topoisomerase type I activity; GO:0006338,chromatin remodeling; GO:0007059,chromosome segregation; GO:0006260,DNA replication; GO:0006265,DNA topological change
gene-LOC100191475	GO:0000228,nuclear chromosome; GO:0000347,THO complex; GO:0000445,THO complex part of transcription export complex; GO:0003729,mRNA binding; GO:0006406,mRNA export from nucleus; GO:0006397,mRNA processing; GO:0032786,positive regulation of DNA-templated transcription, elongation; GO:0008380,RNA splicing
gene-LOC100191477	GO:0005829,cytosol; GO:0005778,peroxisomal membrane; GO:0005052,peroxisome matrix targeting signal-1 binding; GO:0016560,protein import into peroxisome matrix, docking; GO:0006625,protein targeting to peroxisome; GO:0009733,response to auxin
gene-LOC100191478	GO:0005783,endoplasmic reticulum; GO:0005794,Golgi apparatus; GO:0000139,Golgi membrane; GO:0016021,integral component of membrane; GO:0030246,carbohydrate binding; GO:1990714,hydroxyproline O-galactosyltransferase activity; GO:0010405,arabinogalactan protein metabolic process; GO:0018258,protein O-linked glycosylation via hydroxyproline; GO:0080147,root hair cell development
gene-LOC100191479	GO:0010008,endosome membrane; GO:0005794,Golgi apparatus; GO:0000139,Golgi membrane; GO:0016021,integral component of membrane
gene-LOC100191480	GO:0016021,integral component of membrane; GO:0030133,transport vesicle; GO:0017022,myosin binding
gene-LOC100191481	GO:0016021,integral component of membrane; GO:0016757,transferase activity, transferring glycosyl groups
gene-LOC100191482	GO:0005634,nucleus; GO:0003700,DNA-binding transcription factor activity; GO:0046872,metal ion binding; GO:0046983,protein dimerization activity; GO:0000977,RNA polymerase II regulatory region sequence-specific DNA binding; GO:0009791,post-embryonic development; GO:0006357,regulation of transcription by RNA polymerase II; GO:0006351,transcription, DNA-templated
gene-LOC100191483	GO:0009570,chloroplast stroma; GO:0003729,mRNA binding; GO:0006397,mRNA processing; GO:0045727,positive regulation of translation
gene-LOC100191484	GO:0005618,cell wall; GO:0016021,integral component of membrane; GO:0005886,plasma membrane; GO:0005524,ATP binding; GO:0004674,protein serine/threonine kinase activity; GO:2000605,positive regulation of secondary growth
gene-LOC100191485	GO:0005737,cytoplasm; GO:0005634,nucleus; GO:0000151,ubiquitin ligase complex; GO:0046872,metal ion binding; GO:0031625,ubiquitin protein ligase binding; GO:0004842,ubiquitin-protein transferase activity
gene-LOC100191486	GO:0005829,cytosol; GO:0012505,endomembrane system; GO:0000145,exocyst; GO:0070062,extracellular exosome; GO:0045335,phagocytic vesicle; GO:0005886,plasma membrane; GO:0042742,defense response to bacterium; GO:0050832,defense response to fungus; GO:0006887,exocytosis; GO:0009789,positive regulation of abscisic acid-activated signaling pathway; GO:0090333,regulation of stomatal closure; GO:0009414…
gene-LOC100191487	GO:0005886,plasma membrane; GO:0004842,ubiquitin-protein transferase activity
gene-LOC100191488	GO:0005737,cytoplasm; GO:0004252,serine-type endopeptidase activity
gene-LOC100191489	GO:0005783,endoplasmic reticulum; GO:0016021,integral component of membrane; GO:0005773,vacuole; GO:0008374,O-acyltransferase activity; GO:0046027,phospholipid:diacylglycerol acyltransferase activity; GO:0006071,glycerol metabolic process; GO:0019432,triglyceride biosynthetic process
gene-LOC100191490	GO:0005739,mitochondrion; GO:0004519,endonuclease activity; GO:0003729,mRNA binding; GO:0003723,RNA binding; GO:0080156,mitochondrial mRNA modification
gene-LOC100191491	GO:0005794,Golgi apparatus
gene-LOC100191492	GO:0012505,endomembrane system; GO:0016021,integral component of membrane; GO:0005886,plasma membrane; GO:0090406,pollen tube; GO:0005524,ATP binding; GO:0004675,transmembrane receptor protein serine/threonine kinase activity; GO:0007166,cell surface receptor signaling pathway; GO:0006468,protein phosphorylation; GO:0048765,root hair cell differentiation
gene-LOC100191493	GO:0016021,integral component of membrane; GO:0005886,plasma membrane; GO:0005524,ATP binding; GO:0030246,carbohydrate binding; GO:0004674,protein serine/threonine kinase activity; GO:0002229,defense response to oomycetes; GO:0010942,positive regulation of cell death; GO:0010726,positive regulation of hydrogen peroxide metabolic process
gene-LOC100191494	GO:0005887,integral component of plasma membrane; GO:0016020,membrane; GO:0035673,oligopeptide transmembrane transporter activity; GO:0015031,protein transport
gene-LOC100191495	GO:0005886,plasma membrane; GO:0009738,abscisic acid-activated signaling pathway; GO:1900458,negative regulation of brassinosteroid mediated signaling pathway
gene-LOC100191496	GO:0005789,endoplasmic reticulum membrane; GO:0005524,ATP binding; GO:0004674,protein serine/threonine kinase activity; GO:0004712,protein serine/threonine/tyrosine kinase activity; GO:0004871,NA; GO:0071281,cellular response to iron ion; GO:0009873,ethylene-activated signaling pathway; GO:0009686,gibberellin biosynthetic process; GO:0010105,negative regulation of ethylene-activated signaling pat…
gene-LOC100191497	GO:0043231,intracellular membrane-bounded organelle; GO:0004519,endonuclease activity; GO:0003723,RNA binding; GO:0009451,RNA modification
gene-LOC100191498	GO:0005737,cytoplasm; GO:0005634,nucleus; GO:0005524,ATP binding; GO:0004707,MAP kinase activity; GO:0010468,regulation of gene expression
gene-LOC100191499	GO:0009507,chloroplast; GO:0004519,endonuclease activity; GO:0003723,RNA binding; GO:0008270,zinc ion binding; GO:0031425,chloroplast RNA processing; GO:0006397,mRNA processing; GO:0009451,RNA modification
gene-LOC100191500	GO:0005794,Golgi apparatus; GO:0000139,Golgi membrane; GO:0016021,integral component of membrane; GO:0048531,beta-1,3-galactosyltransferase activity; GO:0042546,cell wall biogenesis; GO:0071555,cell wall organization; GO:0045489,pectin biosynthetic process
gene-LOC100191501	GO:0005739,mitochondrion; GO:0004519,endonuclease activity; GO:0000373,Group II intron splicing; GO:0006314,intron homing; GO:0090615,mitochondrial mRNA processing; GO:0007005,mitochondrion organization
gene-LOC100191502	GO:0005576,extracellular region; GO:0004180,carboxypeptidase activity; GO:0016747,transferase activity, transferring acyl groups other than amino-acyl groups; GO:0019748,secondary metabolic process
gene-LOC100191503	GO:0034707,chloride channel complex; GO:0005247,voltage-gated chloride channel activity; GO:1902476,chloride transmembrane transport; GO:0034765,regulation of ion transmembrane transport
gene-LOC100191505	GO:0005886,plasma membrane; GO:0005089,Rho guanyl-nucleotide exchange factor activity; GO:0080092,regulation of pollen tube growth
gene-LOC100191506	GO:0005739,mitochondrion; GO:0005634,nucleus; GO:0003677,DNA binding; GO:0003887,DNA-directed DNA polymerase activity; GO:0006260,DNA replication
gene-LOC100191507	GO:0032153,cell division site; GO:0009504,cell plate; GO:0009507,chloroplast; GO:0005635,nuclear envelope; GO:0031965,nuclear membrane; GO:0009524,phragmoplast; GO:0005886,plasma membrane; GO:0005819,spindle; GO:0005096,GTPase activator activity; GO:0000911,cytokinesis by cell plate formation; GO:0006606,protein import into nucleus
gene-LOC100191508	GO:0030127,COPII vesicle coat; GO:0000139,Golgi membrane; GO:0008270,zinc ion binding; GO:0090114,COPII-coated vesicle budding; GO:0006886,intracellular protein transport
gene-LOC100191509	GO:0005829,cytosol; GO:0005634,nucleus; GO:0016757,transferase activity, transferring glycosyl groups; GO:0009736,cytokinin-activated signaling pathway; GO:0009740,gibberellic acid mediated signaling pathway; GO:0009938,negative regulation of gibberellic acid mediated signaling pathway; GO:0006486,protein glycosylation; GO:2000377,regulation of reactive oxygen species metabolic process
gene-LOC100191510	GO:0080008,Cul4-RING E3 ubiquitin ligase complex; GO:0005730,nucleolus; GO:0005634,nucleus; GO:0034388,Pwp2p-containing subcomplex of 90S preribosome; GO:0032040,small-subunit processome; GO:0030515,snoRNA binding; GO:0009553,embryo sac development; GO:0000462,maturation of SSU-rRNA from tricistronic rRNA transcript (SSU-rRNA, 5.8S rRNA, LSU-rRNA); GO:0010119,regulation of stomatal movement; GO:0…
gene-LOC100191511	GO:0016021,integral component of membrane
gene-LOC100191512	GO:0005737,cytoplasm; GO:0005829,cytosol; GO:0016747,transferase activity, transferring acyl groups other than amino-acyl groups; GO:0010143,cutin biosynthetic process; GO:0051179,localization; GO:0090626,plant epidermis morphogenesis; GO:0010090,trichome morphogenesis
gene-LOC100191513	GO:0005759,mitochondrial matrix; GO:0005739,mitochondrion; GO:0003863,3-methyl-2-oxobutanoate dehydrogenase (2-methylpropanoyl-transferring) activity; GO:0046872,metal ion binding
gene-LOC100191514	GO:0005737,cytoplasm; GO:0005634,nucleus; GO:0017172,cysteine dioxygenase activity; GO:0046872,metal ion binding
gene-LOC100191515	GO:0016301,kinase activity
gene-LOC100191516	GO:0005794,Golgi apparatus; GO:0000139,Golgi membrane; GO:0016021,integral component of membrane; GO:0008375,acetylglucosaminyltransferase activity; GO:0015020,glucuronosyltransferase activity; GO:0009826,unidimensional cell growth
gene-LOC100191517	GO:0005634,nucleus; GO:0003700,DNA-binding transcription factor activity; GO:0043565,sequence-specific DNA binding; GO:0006351,transcription, DNA-templated
gene-LOC100191518	GO:0009507,chloroplast; GO:0005737,cytoplasm; GO:0005730,nucleolus; GO:0005524,ATP binding; GO:0004004,ATP-dependent RNA helicase activity; GO:0070180,large ribosomal subunit rRNA binding; GO:0080158,NA; GO:1901259,chloroplast rRNA processing; GO:0010501,RNA secondary structure unwinding
gene-LOC100191520	GO:0005618,cell wall; GO:0009507,chloroplast; GO:0016020,membrane; GO:0005743,mitochondrial inner membrane; GO:0005758,mitochondrial intermembrane space; GO:0005759,mitochondrial matrix; GO:0005741,mitochondrial outer membrane; GO:0005750,mitochondrial respiratory chain complex III; GO:0005739,mitochondrion; GO:0005730,nucleolus; GO:0005774,vacuolar membrane; GO:0004222,metalloendopeptidase activ…
gene-LOC100191521	GO:0016021,integral component of membrane
gene-LOC100191522	GO:0005739,mitochondrion; GO:0005525,GTP binding; GO:0003924,GTPase activity; GO:0042254,ribosome biogenesis
gene-LOC100191523	GO:0009507,chloroplast; GO:0009570,chloroplast stroma; GO:0003962,cystathionine gamma-synthase activity; GO:0030170,pyridoxal phosphate binding; GO:0009086,methionine biosynthetic process; GO:0001887,selenium compound metabolic process
gene-LOC100191524	GO:0046872,metal ion binding; GO:0004722,protein serine/threonine phosphatase activity
gene-LOC100191526	GO:0033707,3''-deamino-3''-oxonicotianamine reductase activity; GO:0034224,cellular response to zinc ion starvation; GO:1990641,response to iron ion starvation; GO:0019290,siderophore biosynthetic process
gene-LOC100191527	GO:0005576,extracellular region; GO:0016788,hydrolase activity, acting on ester bonds; GO:0016042,lipid catabolic process
gene-LOC100191528	GO:0016021,integral component of membrane
gene-LOC100191529	GO:0005777,peroxisome; GO:0016787,hydrolase activity; GO:0042372,phylloquinone biosynthetic process; GO:0051289,protein homotetramerization
gene-LOC100191530	GO:0005769,early endosome; GO:0031901,early endosome membrane; GO:0030139,endocytic vesicle; GO:0005783,endoplasmic reticulum; GO:0005768,endosome; GO:0032585,multivesicular body membrane; GO:0005886,plasma membrane; GO:0005525,GTP binding; GO:0003924,GTPase activity; GO:0006886,intracellular protein transport; GO:0045324,late endosome to vacuole transport; GO:0007033,vacuole organization
gene-LOC100191531	GO:0031225,anchored component of membrane; GO:0046658,anchored component of plasma membrane; GO:0005783,endoplasmic reticulum; GO:0005576,extracellular region; GO:0005794,Golgi apparatus; GO:0009505,plant-type cell wall; GO:0005886,plasma membrane; GO:0008289,lipid binding; GO:0042335,cuticle development; GO:0050832,defense response to fungus; GO:0006869,lipid transport
gene-LOC100191532	GO:0005737,cytoplasm; GO:0005634,nucleus; GO:0004372,glycine hydroxymethyltransferase activity; GO:0030170,pyridoxal phosphate binding; GO:0019264,glycine biosynthetic process from serine; GO:0044030,regulation of DNA methylation; GO:0046686,response to cadmium ion; GO:0046500,S-adenosylmethionine metabolic process; GO:0055063,sulfate ion homeostasis; GO:0035999,tetrahydrofolate interconversion
gene-LOC100191533	GO:0005634,nucleus; GO:0001046,core promoter sequence-specific DNA binding; GO:0003700,DNA-binding transcription factor activity; GO:0000981,DNA-binding transcription factor activity, RNA polymerase II-specific; GO:0043565,sequence-specific DNA binding; GO:0001135,RNA polymerase II transcription regulator recruiting activity; GO:0044212,transcription regulatory region DNA binding; GO:0030154,cell…
gene-LOC100191534	GO:0003676,nucleic acid binding
gene-LOC100191535	GO:0007142,male meiosis II; GO:0009556,microsporogenesis; GO:0006355,regulation of transcription, DNA-templated
gene-LOC100191536	GO:0016021,integral component of membrane
gene-LOC100191537	GO:0016021,integral component of membrane; GO:0005886,plasma membrane; GO:0005524,ATP binding; GO:0005516,calmodulin binding; GO:0030246,carbohydrate binding; GO:0004674,protein serine/threonine kinase activity; GO:0006468,protein phosphorylation; GO:0048544,recognition of pollen
gene-LOC100191539	GO:0016021,integral component of membrane; GO:0020037,heme binding; GO:0005506,iron ion binding; GO:0004497,monooxygenase activity; GO:0016705,oxidoreductase activity, acting on paired donors, with incorporation or reduction of molecular oxygen
gene-LOC100191540	GO:0005829,cytosol; GO:0005634,nucleus; GO:0003729,mRNA binding; GO:0070300,phosphatidic acid binding
gene-LOC100191541	GO:0004197,cysteine-type endopeptidase activity; GO:0006952,defense response; GO:0043068,positive regulation of programmed cell death
gene-LOC100191542	GO:0048226,Casparian strip; GO:0016021,integral component of membrane; GO:0005886,plasma membrane; GO:0005524,ATP binding; GO:0004674,protein serine/threonine kinase activity; GO:0071555,cell wall organization; GO:0009793,embryo development ending in seed dormancy; GO:0035987,endodermal cell differentiation; GO:0045184,establishment of protein localization; GO:0090558,plant epidermis development;…
gene-LOC100191543	GO:0005634,nucleus; GO:0005516,calmodulin binding; GO:0003677,DNA binding; GO:0006355,regulation of transcription, DNA-templated; GO:0006950,response to stress; GO:0006351,transcription, DNA-templated
gene-LOC100191544	GO:0009507,chloroplast; GO:0016491,oxidoreductase activity; GO:0055114,oxidation-reduction process; GO:0015979,photosynthesis
gene-LOC100191545	GO:0016021,integral component of membrane; GO:0016740,transferase activity
gene-LOC100191546	GO:0000139,Golgi membrane; GO:0016021,integral component of membrane; GO:0016757,transferase activity, transferring glycosyl groups; GO:0071555,cell wall organization; GO:0006486,protein glycosylation
gene-LOC100191548	GO:0009507,chloroplast; GO:0008883,glutamyl-tRNA reductase activity; GO:0050661,NADP binding; GO:0015995,chlorophyll biosynthetic process; GO:0006782,protoporphyrinogen IX biosynthetic process
gene-LOC100191549	GO:0005829,cytosol; GO:0005516,calmodulin binding; GO:0004351,glutamate decarboxylase activity; GO:0030170,pyridoxal phosphate binding; GO:0006536,glutamate metabolic process; GO:0046686,response to cadmium ion
gene-LOC100191551	GO:0035098,ESC/E(Z) complex; GO:0005634,nucleus; GO:0035102,PRC1 complex; GO:0003682,chromatin binding; GO:0046872,metal ion binding; GO:0004518,nuclease activity; GO:0031936,negative regulation of chromatin silencing; GO:0006351,transcription, DNA-templated
gene-LOC100191552	GO:0005634,nucleus; GO:0009408,response to heat; GO:0016032,viral process
gene-LOC100191553	GO:0000151,ubiquitin ligase complex; GO:0016787,hydrolase activity; GO:0004842,ubiquitin-protein transferase activity; GO:0008270,zinc ion binding; GO:0010029,regulation of seed germination
gene-LOC100191554	GO:0005887,integral component of plasma membrane; GO:0008519,ammonium transmembrane transporter activity; GO:0072488,ammonium transmembrane transport; GO:0015695,organic cation transport
gene-LOC100191555	GO:0031966,mitochondrial membrane; GO:0005747,mitochondrial respiratory chain complex I; GO:0005739,mitochondrion; GO:0045271,respiratory chain complex I; GO:0055114,oxidation-reduction process; GO:0009853,photorespiration
gene-LOC100191556	GO:0016021,integral component of membrane; GO:0005634,nucleus; GO:0003677,DNA binding; GO:0003700,DNA-binding transcription factor activity; GO:1900057,positive regulation of leaf senescence; GO:0045893,positive regulation of transcription, DNA-templated; GO:0010200,response to chitin; GO:0006351,transcription, DNA-templated
gene-LOC100191557	GO:0005737,cytoplasm; GO:0005096,GTPase activator activity; GO:0005094,Rho GDP-dissociation inhibitor activity; GO:0009932,cell tip growth; GO:0010053,root epidermal cell differentiation
gene-LOC100191559	GO:0022625,cytosolic large ribosomal subunit; GO:0022626,cytosolic ribosome; GO:0005730,nucleolus; GO:0042788,polysomal ribosome; GO:0003723,RNA binding; GO:0003735,structural constituent of ribosome; GO:0000470,maturation of LSU-rRNA; GO:0006412,translation
gene-LOC100191560	GO:0009941,chloroplast envelope; GO:0009535,chloroplast thylakoid membrane; GO:0016021,integral component of membrane; GO:0005524,ATP binding; GO:0004176,ATP-dependent peptidase activity; GO:0046872,metal ion binding; GO:0004222,metalloendopeptidase activity; GO:0008237,metallopeptidase activity; GO:0010205,photoinhibition; GO:0010206,photosystem II repair; GO:0006508,proteolysis; GO:0010304,PSII…
gene-LOC100191561	GO:0005737,cytoplasm; GO:0005856,cytoskeleton; GO:0005524,ATP binding
gene-LOC100191562	GO:0005783,endoplasmic reticulum; GO:0016021,integral component of membrane; GO:0005886,plasma membrane; GO:0080132,fatty acid alpha-hydroxylase activity; GO:0020037,heme binding; GO:0005506,iron ion binding; GO:0004497,monooxygenase activity; GO:0016705,oxidoreductase activity, acting on paired donors, with incorporation or reduction of molecular oxygen; GO:0010012,steroid 22-alpha hydroxylase a…
gene-LOC100191563	GO:0005634,nucleus; GO:0005667,transcription factor complex; GO:0003682,chromatin binding; GO:0003700,DNA-binding transcription factor activity; GO:0000977,RNA polymerase II regulatory region sequence-specific DNA binding; GO:0001085,RNA polymerase II transcription factor binding; GO:0044212,transcription regulatory region DNA binding; GO:0001228,DNA-binding transcription activator activity, RNA …
gene-LOC100191564	GO:0048046,apoplast; GO:0005618,cell wall; GO:0009505,plant-type cell wall; GO:0052692,raffinose alpha-galactosidase activity; GO:0005975,carbohydrate metabolic process; GO:0071555,cell wall organization
gene-LOC100191565	GO:0005829,cytosol; GO:0005777,peroxisome; GO:0008710,8-amino-7-oxononanoate synthase activity; GO:0030170,pyridoxal phosphate binding; GO:0009102,biotin biosynthetic process
gene-LOC100191566	GO:0005576,extracellular region; GO:0005509,calcium ion binding; GO:0004623,phospholipase A2 activity; GO:0102567,phospholipase A2 activity (consuming 1,2-dipalmitoylphosphatidylcholine); GO:0102568,phospholipase A2 activity consuming 1,2-dioleoylphosphatidylethanolamine); GO:0050482,arachidonic acid secretion; GO:0016042,lipid catabolic process; GO:0006644,phospholipid metabolic process
gene-LOC100191567	GO:0005794,Golgi apparatus; GO:0000139,Golgi membrane; GO:0016021,integral component of membrane; GO:0016413,O-acetyltransferase activity; GO:0010411,xyloglucan metabolic process
gene-LOC100191568	GO:0005737,cytoplasm; GO:0019005,SCF ubiquitin ligase complex; GO:0031625,ubiquitin protein ligase binding; GO:0043161,proteasome-mediated ubiquitin-dependent protein catabolic process; GO:0042787,NA; GO:0030162,regulation of proteolysis
gene-LOC100191570	GO:0005794,Golgi apparatus; GO:0000139,Golgi membrane; GO:0016021,integral component of membrane; GO:0047262,polygalacturonate 4-alpha-galacturonosyltransferase activity; GO:0016757,transferase activity, transferring glycosyl groups; GO:0071555,cell wall organization; GO:0045489,pectin biosynthetic process; GO:0000271,polysaccharide biosynthetic process
gene-LOC100191571	GO:0005525,GTP binding; GO:0004475,mannose-1-phosphate guanylyltransferase activity; GO:0009298,GDP-mannose biosynthetic process
gene-LOC100191573	GO:0009507,chloroplast; GO:0003824,catalytic activity
gene-LOC100191574	GO:0005737,cytoplasm; GO:0016791,phosphatase activity; GO:0004725,protein tyrosine phosphatase activity
gene-LOC100191575	GO:0005634,nucleus; GO:0003677,DNA binding; GO:0009734,auxin-activated signaling pathway; GO:0006355,regulation of transcription, DNA-templated; GO:0006351,transcription, DNA-templated
gene-LOC100191576	GO:0005783,endoplasmic reticulum; GO:0005789,endoplasmic reticulum membrane; GO:0071782,endoplasmic reticulum tubular network; GO:0071458,integral component of cytoplasmic side of endoplasmic reticulum membrane; GO:0005886,plasma membrane; GO:0005773,vacuole; GO:0071786,endoplasmic reticulum tubular network organization
gene-LOC100191577	GO:0005783,endoplasmic reticulum; GO:0009506,plasmodesma; GO:0010496,intercellular transport; GO:0046907,intracellular transport; GO:0016032,viral process
gene-LOC100191578	GO:0032578,aleurone grain membrane; GO:0005773,vacuole; GO:0005509,calcium ion binding
gene-LOC100191580	GO:0016021,integral component of membrane
gene-LOC100191581	GO:0005634,nucleus; GO:0009734,auxin-activated signaling pathway; GO:0006355,regulation of transcription, DNA-templated; GO:0009733,response to auxin; GO:0006351,transcription, DNA-templated
gene-LOC100191582	GO:0071949,FAD binding; GO:0004497,monooxygenase activity; GO:0002239,response to oomycetes; GO:0044550,secondary metabolite biosynthetic process
gene-LOC100191584	GO:0048046,apoplast; GO:0005618,cell wall; GO:0004553,hydrolase activity, hydrolyzing O-glycosyl compounds; GO:0016762,xyloglucan:xyloglucosyl transferase activity; GO:0071555,cell wall organization; GO:0009832,plant-type cell wall biogenesis; GO:0010411,xyloglucan metabolic process
gene-LOC100191586	GO:0005737,cytoplasm; GO:0000932,P-body; GO:0008047,enzyme activator activity; GO:0030234,enzyme regulator activity; GO:0016787,hydrolase activity; GO:0003729,mRNA binding; GO:0000290,deadenylation-dependent decapping of nuclear-transcribed mRNA; GO:0031087,deadenylation-independent decapping of nuclear-transcribed mRNA; GO:0006952,defense response; GO:0006397,mRNA processing
gene-LOC100191587	GO:0010494,cytoplasmic stress granule; GO:0005634,nucleus; GO:0008143,poly(A) binding; GO:0034605,cellular response to heat; GO:0006397,mRNA processing
gene-LOC100191588	GO:0016021,integral component of membrane
gene-LOC100191589	GO:0005634,nucleus; GO:0001046,core promoter sequence-specific DNA binding; GO:0003700,DNA-binding transcription factor activity; GO:0046983,protein dimerization activity; GO:0001228,DNA-binding transcription activator activity, RNA polymerase II-specific; GO:0006355,regulation of transcription, DNA-templated; GO:0006366,transcription by RNA polymerase II
gene-LOC100191590	GO:0005622,intracellular; GO:0035556,intracellular signal transduction
gene-LOC100191591	GO:0005829,cytosol; GO:0033926,glycopeptide alpha-N-acetylgalactosaminidase activity; GO:0004575,sucrose alpha-glucosidase activity; GO:0010311,lateral root formation; GO:0009555,pollen development; GO:0080022,primary root development; GO:0048510,regulation of timing of transition from vegetative to reproductive phase; GO:0005987,sucrose catabolic process
gene-LOC100191592	GO:0004568,chitinase activity; GO:0016998,cell wall macromolecule catabolic process; GO:0006032,chitin catabolic process; GO:0000272,polysaccharide catabolic process
gene-LOC100191593	GO:0030246,carbohydrate binding; GO:0042742,defense response to bacterium; GO:0050832,defense response to fungus
gene-LOC100191594	GO:0005829,cytosol; GO:0016020,membrane; GO:0005634,nucleus; GO:0005525,GTP binding; GO:0005096,GTPase activator activity; GO:0005089,Rho guanyl-nucleotide exchange factor activity; GO:0000919,cell plate assembly; GO:0042546,cell wall biogenesis; GO:0009793,embryo development ending in seed dormancy; GO:0048528,post-embryonic root development
gene-LOC100191595	GO:0005783,endoplasmic reticulum; GO:0005789,endoplasmic reticulum membrane; GO:0016021,integral component of membrane; GO:0102336,3-oxo-arachidoyl-CoA synthase activity; GO:0102337,3-oxo-cerotoyl-CoA synthase activity; GO:0102338,3-oxo-lignoceronyl-CoA synthase activity; GO:0102756,very-long-chain 3-ketoacyl-CoA synthase activity; GO:0006633,fatty acid biosynthetic process; GO:0009409,response t…
gene-LOC100191596	GO:0016021,integral component of membrane; GO:0005215,transporter activity; GO:0055085,transmembrane transport
gene-LOC100191598	GO:0005737,cytoplasm; GO:0009408,response to heat; GO:0009644,response to high light intensity; GO:0042542,response to hydrogen peroxide
gene-LOC100191600	GO:0004864,protein phosphatase inhibitor activity
gene-LOC100191601	GO:0005783,endoplasmic reticulum; GO:0005789,endoplasmic reticulum membrane; GO:0016021,integral component of membrane; GO:0005886,plasma membrane; GO:0004310,farnesyl-diphosphate farnesyltransferase activity; GO:0016491,oxidoreductase activity; GO:0051996,squalene synthase activity; GO:0006696,ergosterol biosynthetic process; GO:0045338,farnesyl diphosphate metabolic process; GO:0008299,isopreno…
gene-LOC100191602	GO:0005615,extracellular space; GO:0005764,lysosome; GO:0010282,senescence-associated vacuole; GO:0004197,cysteine-type endopeptidase activity; GO:0007568,aging; GO:0010150,leaf senescence; GO:0010623,programmed cell death involved in cell development; GO:0051603,proteolysis involved in cellular protein catabolic process; GO:0009737,response to abscisic acid; GO:0009723,response to ethylene; GO:0…
gene-LOC100191603	GO:0005777,peroxisome; GO:0046592,polyamine oxidase activity; GO:0006598,polyamine catabolic process
gene-LOC100191604	GO:0016787,hydrolase activity
gene-LOC100191605	GO:0016787,hydrolase activity
gene-LOC100191606	GO:0005829,cytosol; GO:0005096,GTPase activator activity; GO:0046872,metal ion binding
gene-LOC100191607	GO:0005618,cell wall; GO:0009507,chloroplast; GO:0005829,cytosol; GO:0022625,cytosolic large ribosomal subunit; GO:0022626,cytosolic ribosome; GO:0016020,membrane; GO:0005730,nucleolus; GO:0005886,plasma membrane; GO:0009506,plasmodesma; GO:0042788,polysomal ribosome; GO:0005773,vacuole; GO:0003729,mRNA binding; GO:0003735,structural constituent of ribosome; GO:0002181,cytoplasmic translation
gene-LOC100191608	GO:0009535,chloroplast thylakoid membrane; GO:0016747,transferase activity, transferring acyl groups other than amino-acyl groups; GO:0071555,cell wall organization; GO:0009555,pollen development; GO:0042761,very long-chain fatty acid biosynthetic process
gene-LOC100191610	GO:0005524,ATP binding; GO:0004674,protein serine/threonine kinase activity; GO:0009742,brassinosteroid mediated signaling pathway
gene-LOC100191611	GO:0005634,nucleus; GO:0003729,mRNA binding; GO:0008143,poly(A) binding; GO:0003723,RNA binding; GO:0006397,mRNA processing; GO:0009735,response to cytokinin; GO:0010193,response to ozone
gene-LOC100191612	GO:0005840,ribosome; GO:0003735,structural constituent of ribosome; GO:0006412,translation
gene-LOC100191614	GO:0005829,cytosol; GO:0005524,ATP binding; GO:0016301,kinase activity; GO:0000287,magnesium ion binding; GO:0030955,potassium ion binding; GO:0004743,pyruvate kinase activity; GO:0006096,glycolytic process
gene-LOC100191616	GO:0005634,nucleus; GO:0046872,metal ion binding; GO:0004842,ubiquitin-protein transferase activity; GO:0007623,circadian rhythm; GO:0009908,flower development; GO:0010629,negative regulation of gene expression; GO:0009585,red, far-red light phototransduction; GO:0010468,regulation of gene expression; GO:2000028,regulation of photoperiodism, flowering; GO:0090227,regulation of red or far-red ligh…
gene-LOC100191617	GO:0005783,endoplasmic reticulum; GO:0080043,quercetin 3-O-glucosyltransferase activity; GO:0080044,quercetin 7-O-glucosyltransferase activity; GO:0008152,metabolic process
gene-LOC100191618	GO:0005634,nucleus; GO:0042802,identical protein binding; GO:0071472,cellular response to salt stress; GO:0042631,cellular response to water deprivation; GO:0016567,protein ubiquitination; GO:0006970,response to osmotic stress
gene-LOC100191619	GO:0016021,integral component of membrane; GO:0016787,hydrolase activity; GO:0016042,lipid catabolic process
gene-LOC100191620	GO:0005618,cell wall; GO:0005576,extracellular region; GO:0008061,chitin binding; GO:0004568,chitinase activity; GO:0008843,endochitinase activity; GO:0035885,exochitinase activity; GO:0005975,carbohydrate metabolic process; GO:0006032,chitin catabolic process; GO:0009737,response to abscisic acid; GO:0009753,response to jasmonic acid; GO:0009651,response to salt stress
gene-LOC100191621	GO:0016021,integral component of membrane; GO:0102336,3-oxo-arachidoyl-CoA synthase activity; GO:0102337,3-oxo-cerotoyl-CoA synthase activity; GO:0102338,3-oxo-lignoceronyl-CoA synthase activity; GO:0102756,very-long-chain 3-ketoacyl-CoA synthase activity; GO:0006633,fatty acid biosynthetic process
gene-LOC100191622	GO:0005737,cytoplasm; GO:0005829,cytosol; GO:0005794,Golgi apparatus; GO:0031902,late endosome membrane; GO:0005765,lysosomal membrane; GO:0005634,nucleus; GO:0005886,plasma membrane; GO:0009506,plasmodesma; GO:0005819,spindle; GO:0005774,vacuolar membrane; GO:0005773,vacuole; GO:0005525,GTP binding; GO:0007049,cell cycle; GO:0051301,cell division; GO:0007059,chromosome segregation; GO:0051607,de…
gene-LOC100191623	GO:0005576,extracellular region; GO:0004190,aspartic-type endopeptidase activity
gene-LOC100191624	GO:0009507,chloroplast; GO:0005829,cytosol; GO:0031011,Ino80 complex; GO:0035267,NuA4 histone acetyltransferase complex; GO:0005730,nucleolus; GO:0005634,nucleus; GO:0097255,R2TP complex; GO:0000812,Swr1 complex; GO:0005524,ATP binding; GO:0043141,ATP-dependent 5'-3' DNA helicase activity; GO:0004003,ATP-dependent DNA helicase activity; GO:0000492,box C/D snoRNP assembly; GO:0030154,cell differen…
gene-LOC100191625	GO:0005789,endoplasmic reticulum membrane; GO:0016021,integral component of membrane; GO:0003882,CDP-diacylglycerol-serine O-phosphatidyltransferase activity; GO:0006646,phosphatidylethanolamine biosynthetic process; GO:0006659,phosphatidylserine biosynthetic process
gene-LOC100191626	GO:0016787,hydrolase activity
gene-LOC100191627	GO:0005743,mitochondrial inner membrane; GO:0045261,proton-transporting ATP synthase complex, catalytic core F(1); GO:0046933,proton-transporting ATP synthase activity, rotational mechanism; GO:0015986,ATP synthesis coupled proton transport
gene-LOC100191628	GO:0009507,chloroplast; GO:0031969,chloroplast membrane; GO:0016021,integral component of membrane; GO:0007275,multicellular organism development
gene-LOC100191629	GO:0005737,cytoplasm; GO:0004177,aminopeptidase activity; GO:0046872,metal ion binding; GO:0008235,metalloexopeptidase activity; GO:0016485,protein processing
gene-LOC100191630	GO:0005634,nucleus; GO:0005516,calmodulin binding; GO:0003700,DNA-binding transcription factor activity; GO:0043565,sequence-specific DNA binding; GO:0019760,glucosinolate metabolic process; GO:0006351,transcription, DNA-templated
gene-LOC100191631	GO:0048046,apoplast; GO:0005618,cell wall; GO:0005773,vacuole; GO:0004565,beta-galactosidase activity; GO:0005975,carbohydrate metabolic process
gene-LOC100191632	GO:0012505,endomembrane system; GO:0005783,endoplasmic reticulum; GO:0016021,integral component of membrane; GO:0005886,plasma membrane; GO:0009506,plasmodesma; GO:0008289,lipid binding; GO:0046872,metal ion binding; GO:0006869,lipid transport
gene-LOC100191636	GO:0031969,chloroplast membrane; GO:0009570,chloroplast stroma; GO:0005829,cytosol; GO:0005783,endoplasmic reticulum; GO:0005789,endoplasmic reticulum membrane; GO:0016021,integral component of membrane; GO:0043231,intracellular membrane-bounded organelle; GO:1904962,plastid to vacuole vesicle-mediated transport; GO:0071211,protein targeting to vacuole involved in autophagy
gene-LOC100191638	GO:0009269,response to desiccation
gene-LOC100191639	GO:0016021,integral component of membrane
gene-LOC100191640	GO:0046872,metal ion binding; GO:0004842,ubiquitin-protein transferase activity; GO:0051865,protein autoubiquitination; GO:0016567,protein ubiquitination; GO:0009414,response to water deprivation
gene-LOC100191641	GO:0005737,cytoplasm; GO:0005634,nucleus; GO:0003700,DNA-binding transcription factor activity; GO:0043565,sequence-specific DNA binding; GO:0006351,transcription, DNA-templated
gene-LOC100191642	GO:0016021,integral component of membrane; GO:0008289,lipid binding
gene-LOC100191643	GO:0016021,integral component of membrane
gene-LOC100191644	GO:0005634,nucleus; GO:0003723,RNA binding
gene-LOC100191645	GO:0046872,metal ion binding; GO:0004721,phosphoprotein phosphatase activity
gene-LOC100191647	GO:0005634,nucleus; GO:0042802,identical protein binding; GO:0071472,cellular response to salt stress; GO:0042631,cellular response to water deprivation; GO:0016567,protein ubiquitination; GO:0006970,response to osmotic stress
gene-LOC100191648	GO:0005618,cell wall; GO:0009507,chloroplast; GO:0080008,Cul4-RING E3 ubiquitin ligase complex; GO:0005634,nucleus; GO:0000974,Prp19 complex; GO:0071006,U2-type catalytic step 1 spliceosome; GO:0061630,ubiquitin protein ligase activity; GO:0004842,ubiquitin-protein transferase activity; GO:0042742,defense response to bacterium; GO:0006281,DNA repair; GO:0000349,generation of catalytic spliceosome…
gene-LOC100191650	GO:0009504,cell plate; GO:0031901,early endosome membrane; GO:0005768,endosome; GO:0016021,integral component of membrane; GO:0005886,plasma membrane; GO:0009506,plasmodesma; GO:0031201,SNARE complex; GO:0005484,SNAP receptor activity; GO:0000149,SNARE binding; GO:0009920,cell plate formation involved in plant-type cell wall biogenesis; GO:0006887,exocytosis; GO:0015031,protein transport; GO:0006…
gene-LOC100191652	GO:0016602,CCAAT-binding factor complex; GO:0003677,DNA binding; GO:0003700,DNA-binding transcription factor activity; GO:0006351,transcription, DNA-templated
gene-LOC100191653	GO:0046872,metal ion binding; GO:0004722,protein serine/threonine phosphatase activity
gene-LOC100191654	GO:0009570,chloroplast stroma; GO:0005504,fatty acid binding; GO:0016872,intramolecular lyase activity; GO:0006631,fatty acid metabolic process
gene-LOC100191655	GO:0005737,cytoplasm; GO:0003729,mRNA binding; GO:0046719,regulation by virus of viral protein levels in host cell; GO:0009735,response to cytokinin; GO:0008380,RNA splicing
gene-LOC100191656	GO:0009507,chloroplast; GO:0009941,chloroplast envelope; GO:0030093,chloroplast photosystem I; GO:0009534,chloroplast thylakoid; GO:0009535,chloroplast thylakoid membrane; GO:0016021,integral component of membrane; GO:0009295,nucleoid; GO:0009508,plastid chromosome; GO:0009579,thylakoid; GO:0003677,DNA binding; GO:0019904,protein domain specific binding; GO:0009773,photosynthetic electron transpo…
gene-LOC100191657	GO:0009507,chloroplast; GO:0009570,chloroplast stroma; GO:0009534,chloroplast thylakoid; GO:0005739,mitochondrion; GO:0004450,isocitrate dehydrogenase (NADP+) activity; GO:0000287,magnesium ion binding; GO:0051287,NAD binding; GO:0006102,isocitrate metabolic process; GO:0006099,tricarboxylic acid cycle
gene-LOC100191658	GO:0016021,integral component of membrane; GO:0004872,NA; GO:0009725,response to hormone; GO:0009744,response to sucrose
gene-LOC100191659	GO:0043231,intracellular membrane-bounded organelle; GO:0016020,membrane; GO:0004519,endonuclease activity; GO:0003723,RNA binding; GO:0009451,RNA modification
gene-LOC100191660	GO:0005576,extracellular region; GO:0009505,plant-type cell wall; GO:0052793,pectin acetylesterase activity; GO:0071555,cell wall organization
gene-LOC100191661	GO:0016021,integral component of membrane; GO:0046872,metal ion binding; GO:0055114,oxidation-reduction process
gene-LOC100191663	GO:0005737,cytoplasm; GO:0005829,cytosol; GO:0005783,endoplasmic reticulum; GO:0005634,nucleus; GO:0003682,chromatin binding; GO:0003729,mRNA binding; GO:0043565,sequence-specific DNA binding; GO:0071395,cellular response to jasmonic acid stimulus; GO:0042742,defense response to bacterium; GO:0050832,defense response to fungus; GO:0045087,innate immune response; GO:0007275,multicellular organism …
gene-LOC100191664	GO:0016758,transferase activity, transferring hexosyl groups; GO:0008152,metabolic process
gene-LOC100191665	GO:0005829,cytosol; GO:0005643,nuclear pore; GO:0005654,nucleoplasm; GO:0048471,perinuclear region of cytoplasm; GO:0008139,nuclear localization sequence binding; GO:0008565,protein transporter activity; GO:0006607,NLS-bearing protein import into nucleus
gene-LOC100191666	GO:0005737,cytoplasm; GO:0005634,nucleus; GO:0003723,RNA binding; GO:0009911,positive regulation of flower development; GO:0006355,regulation of transcription, DNA-templated; GO:0006351,transcription, DNA-templated
gene-LOC100191667	GO:0005634,nucleus; GO:0003700,DNA-binding transcription factor activity; GO:0043565,sequence-specific DNA binding; GO:0009908,flower development; GO:0045892,negative regulation of transcription, DNA-templated; GO:0006351,transcription, DNA-templated; GO:0010228,vegetative to reproductive phase transition of meristem
gene-LOC100191668	GO:0005794,Golgi apparatus; GO:0000139,Golgi membrane; GO:0016021,integral component of membrane; GO:0009506,plasmodesma; GO:0004252,serine-type endopeptidase activity
gene-LOC100191669	GO:0005089,Rho guanyl-nucleotide exchange factor activity
gene-LOC100191670	GO:0008234,cysteine-type peptidase activity
gene-LOC100191671	GO:0004619,phosphoglycerate mutase activity; GO:0006096,glycolytic process
gene-LOC100191672	GO:0009507,chloroplast; GO:0045300,acyl-[acyl-carrier-protein] desaturase activity; GO:0046872,metal ion binding; GO:0102786,stearoyl-[acp] desaturase activity; GO:0006952,defense response; GO:0006633,fatty acid biosynthetic process
gene-LOC100191673	GO:0005786,signal recognition particle, endoplasmic reticulum targeting; GO:0008312,7S RNA binding; GO:0005525,GTP binding; GO:0003924,GTPase activity; GO:0006614,SRP-dependent cotranslational protein targeting to membrane
gene-LOC100191674	GO:0005783,endoplasmic reticulum; GO:0005794,Golgi apparatus; GO:0005886,plasma membrane; GO:0009506,plasmodesma; GO:0003846,2-acylglycerol O-acyltransferase activity; GO:0090430,caffeoyl-CoA: alcohol caffeoyl transferase activity; GO:0016787,hydrolase activity; GO:0004622,lysophospholipase activity; GO:0009809,lignin biosynthetic process; GO:0006629,lipid metabolic process; GO:0046686,response t…
gene-LOC100191675	GO:0005789,endoplasmic reticulum membrane; GO:0016021,integral component of membrane; GO:0020037,heme binding; GO:0005506,iron ion binding; GO:0004497,monooxygenase activity; GO:0016705,oxidoreductase activity, acting on paired donors, with incorporation or reduction of molecular oxygen
gene-LOC100191676	GO:0009706,chloroplast inner membrane; GO:0016021,integral component of membrane; GO:0009536,plastid; GO:0005315,inorganic phosphate transmembrane transporter activity; GO:0015229,L-ascorbic acid transmembrane transporter activity; GO:0098656,anion transmembrane transport; GO:0010028,xanthophyll cycle
gene-LOC100191677	GO:0005634,nucleus; GO:0003677,DNA binding; GO:0006355,regulation of transcription, DNA-templated; GO:0006351,transcription, DNA-templated
gene-LOC100191678	GO:0003723,RNA binding; GO:0008757,S-adenosylmethionine-dependent methyltransferase activity; GO:0006364,rRNA processing
gene-LOC100191679	GO:0005634,nucleus; GO:0003904,deoxyribodipyrimidine photo-lyase activity; GO:0003677,DNA binding; GO:0071949,FAD binding; GO:0006281,DNA repair; GO:0000719,photoreactive repair; GO:0009650,UV protection
gene-LOC100191680	GO:0016021,integral component of membrane; GO:0005886,plasma membrane; GO:0009506,plasmodesma; GO:0090448,glucosinolate:proton symporter activity; GO:1901349,glucosinolate transport; GO:0090449,phloem glucosinolate loading; GO:0080167,response to karrikin
gene-LOC100191681	GO:0022625,cytosolic large ribosomal subunit; GO:0003723,RNA binding; GO:0003735,structural constituent of ribosome; GO:0002181,cytoplasmic translation
gene-LOC100191682	GO:0016021,integral component of membrane; GO:0004872,NA; GO:0009725,response to hormone; GO:0009744,response to sucrose
gene-LOC100191683	GO:0016021,integral component of membrane
gene-LOC100191684	GO:0009535,chloroplast thylakoid membrane; GO:0019898,extrinsic component of membrane; GO:0016021,integral component of membrane; GO:0009654,photosystem II oxygen evolving complex; GO:0005509,calcium ion binding; GO:0015979,photosynthesis; GO:0042549,photosystem II stabilization
gene-LOC100191685	GO:0005634,nucleus; GO:0003677,DNA binding; GO:0003700,DNA-binding transcription factor activity; GO:0043621,protein self-association; GO:0009648,photoperiodism; GO:0009911,positive regulation of flower development; GO:0045893,positive regulation of transcription, DNA-templated; GO:0009909,regulation of flower development; GO:2000028,regulation of photoperiodism, flowering; GO:0006355,regulation …
gene-LOC100191686	GO:0005829,cytosol; GO:0005886,plasma membrane; GO:0046872,metal ion binding; GO:0050308,sugar-phosphatase activity
gene-LOC100191687	GO:0016021,integral component of membrane; GO:0005774,vacuolar membrane; GO:0015297,antiporter activity; GO:0015238,drug transmembrane transporter activity; GO:0006855,drug transmembrane transport; GO:0009624,response to nematode
gene-LOC100191688	GO:0016021,integral component of membrane; GO:0046872,metal ion binding; GO:0061630,ubiquitin protein ligase activity; GO:0004842,ubiquitin-protein transferase activity; GO:0043161,proteasome-mediated ubiquitin-dependent protein catabolic process; GO:0016567,protein ubiquitination
gene-LOC100191689	GO:0015934,large ribosomal subunit; GO:0003735,structural constituent of ribosome; GO:0006412,translation
gene-LOC100191690	GO:0005886,plasma membrane; GO:0005524,ATP binding; GO:0004674,protein serine/threonine kinase activity; GO:0004675,transmembrane receptor protein serine/threonine kinase activity; GO:0007166,cell surface receptor signaling pathway; GO:0042742,defense response to bacterium; GO:0006468,protein phosphorylation
gene-LOC100191691	GO:0016021,integral component of membrane; GO:0031902,late endosome membrane; GO:0032586,protein storage vacuole membrane; GO:0046872,metal ion binding; GO:0015031,protein transport
gene-LOC100191692	GO:0005634,nucleus; GO:0018024,histone-lysine N-methyltransferase activity; GO:0046872,metal ion binding
gene-LOC100191693	GO:0016021,integral component of membrane
gene-LOC100191695	GO:0005829,cytosol; GO:0005789,endoplasmic reticulum membrane; GO:0012507,ER to Golgi transport vesicle membrane; GO:0005794,Golgi apparatus; GO:0016021,integral component of membrane; GO:0031902,late endosome membrane; GO:0031201,SNARE complex; GO:0005484,SNAP receptor activity; GO:0006888,ER to Golgi vesicle-mediated transport; GO:0006896,Golgi to vacuole transport; GO:0006623,protein targeting…
gene-LOC100191697	GO:0016021,integral component of membrane; GO:0010295,(+)-abscisic acid 8'-hydroxylase activity; GO:0020037,heme binding; GO:0005506,iron ion binding; GO:0046345,abscisic acid catabolic process; GO:0016132,brassinosteroid biosynthetic process; GO:0010268,brassinosteroid homeostasis; GO:0007275,multicellular organism development; GO:0016125,sterol metabolic process
gene-LOC100191698	GO:0043231,intracellular membrane-bounded organelle; GO:0004519,endonuclease activity; GO:0003723,RNA binding; GO:0009451,RNA modification
gene-LOC100191699	GO:0004553,hydrolase activity, hydrolyzing O-glycosyl compounds; GO:0005975,carbohydrate metabolic process
gene-LOC100191700	GO:0005737,cytoplasm; GO:0005856,cytoskeleton; GO:0031514,motile cilium
gene-LOC100191701	GO:0071944,cell periphery; GO:0005618,cell wall; GO:0005576,extracellular region; GO:0045330,aspartyl esterase activity; GO:0030599,pectinesterase activity; GO:0046910,pectinesterase inhibitor activity; GO:0042545,cell wall modification; GO:0045490,pectin catabolic process
gene-LOC100191702	GO:0005783,endoplasmic reticulum; GO:0005789,endoplasmic reticulum membrane; GO:0071782,endoplasmic reticulum tubular network; GO:0005794,Golgi apparatus; GO:0071458,integral component of cytoplasmic side of endoplasmic reticulum membrane; GO:0005886,plasma membrane; GO:0071786,endoplasmic reticulum tubular network organization
gene-LOC100191704	GO:0009507,chloroplast; GO:0009570,chloroplast stroma; GO:0009578,etioplast stroma; GO:0051537,2 iron, 2 sulfur cluster binding; GO:0009055,electron transfer activity; GO:0046872,metal ion binding; GO:0022900,electron transport chain
gene-LOC100191705	GO:0005829,cytosol; GO:0005783,endoplasmic reticulum; GO:0005789,endoplasmic reticulum membrane; GO:0016021,integral component of membrane; GO:0005634,nucleus; GO:0005886,plasma membrane; GO:0006605,protein targeting
gene-LOC100191706	GO:0003682,chromatin binding; GO:0045892,negative regulation of transcription, DNA-templated; GO:0007219,Notch signaling pathway
gene-LOC100191707	GO:0005576,extracellular region; GO:0016788,hydrolase activity, acting on ester bonds; GO:0016042,lipid catabolic process
gene-LOC100191708	GO:0005618,cell wall; GO:0005576,extracellular region
gene-LOC100191709	GO:0016021,integral component of membrane; GO:0022857,transmembrane transporter activity; GO:0006857,oligopeptide transport
gene-LOC100191711	GO:0008168,methyltransferase activity
gene-LOC100191712	GO:0016021,integral component of membrane; GO:0005509,calcium ion binding; GO:0071618,lysophosphatidylethanolamine acyltransferase activity; GO:0050200,plasmalogen synthase activity; GO:0008654,phospholipid biosynthetic process; GO:0006644,phospholipid metabolic process; GO:0000038,very long-chain fatty acid metabolic process
gene-LOC100191714	GO:0009506,plasmodesma; GO:0009736,cytokinin-activated signaling pathway; GO:0009914,hormone transport
gene-LOC100191715	GO:0009941,chloroplast envelope; GO:0009535,chloroplast thylakoid membrane; GO:0016021,integral component of membrane; GO:0009522,photosystem I; GO:0009523,photosystem II; GO:0010287,plastoglobule; GO:0016168,chlorophyll binding; GO:0046872,metal ion binding; GO:0031409,pigment binding; GO:0009768,photosynthesis, light harvesting in photosystem I; GO:0018298,protein-chromophore linkage; GO:000941…
gene-LOC100191716	GO:0005634,nucleus; GO:0003677,DNA binding; GO:0003700,DNA-binding transcription factor activity; GO:0009908,flower development; GO:0006351,transcription, DNA-templated
gene-LOC100191717	GO:0016021,integral component of membrane
gene-LOC100191718	GO:0009507,chloroplast; GO:0005886,plasma membrane
gene-LOC100191719	GO:0005789,endoplasmic reticulum membrane; GO:0016021,integral component of membrane; GO:0046872,metal ion binding; GO:0004842,ubiquitin-protein transferase activity; GO:0043161,proteasome-mediated ubiquitin-dependent protein catabolic process; GO:0016567,protein ubiquitination; GO:0009409,response to cold; GO:0009723,response to ethylene; GO:0006970,response to osmotic stress; GO:0009414,respons…
gene-LOC100191720	GO:0008171,O-methyltransferase activity; GO:0046983,protein dimerization activity; GO:0008757,S-adenosylmethionine-dependent methyltransferase activity; GO:0019438,aromatic compound biosynthetic process; GO:0032259,methylation
gene-LOC100191721	GO:0016021,integral component of membrane; GO:0005886,plasma membrane; GO:0005524,ATP binding; GO:0004674,protein serine/threonine kinase activity; GO:0042742,defense response to bacterium; GO:0006468,protein phosphorylation
gene-LOC100191723	GO:0008270,zinc ion binding
gene-LOC100191724	GO:0008725,DNA-3-methyladenine glycosylase activity; GO:0006284,base-excision repair
gene-LOC100191726	GO:0005737,cytoplasm; GO:0005524,ATP binding; GO:0004672,protein kinase activity; GO:0004674,protein serine/threonine kinase activity; GO:0004871,NA; GO:0035556,intracellular signal transduction
gene-LOC100191727	GO:0005737,cytoplasm; GO:0005730,nucleolus; GO:0005524,ATP binding; GO:0004004,ATP-dependent RNA helicase activity; GO:0003723,RNA binding; GO:0010501,RNA secondary structure unwinding
gene-LOC100191728	GO:0005634,nucleus; GO:0000989,NA; GO:0009740,gibberellic acid mediated signaling pathway; GO:0006355,regulation of transcription, DNA-templated; GO:0006351,transcription, DNA-templated
gene-LOC100191729	GO:0016021,integral component of membrane; GO:0005774,vacuolar membrane; GO:0005524,ATP binding; GO:0008551,cadmium-exporting ATPase activity; GO:0046872,metal ion binding; GO:0016463,zinc-exporting ATPase activity
gene-LOC100191730	GO:0016787,hydrolase activity; GO:0008152,metabolic process
gene-LOC100191731	GO:0005634,nucleus; GO:0003677,DNA binding; GO:0048653,anther development; GO:0030154,cell differentiation; GO:0009555,pollen development; GO:0006355,regulation of transcription, DNA-templated; GO:0006351,transcription, DNA-templated
gene-LOC100191734	GO:0016021,integral component of membrane; GO:0005886,plasma membrane; GO:0005524,ATP binding; GO:0004672,protein kinase activity; GO:0004674,protein serine/threonine kinase activity; GO:0042742,defense response to bacterium
gene-LOC100191735	GO:0005634,nucleus; GO:0003700,DNA-binding transcription factor activity; GO:0046872,metal ion binding; GO:0046983,protein dimerization activity; GO:0000977,RNA polymerase II regulatory region sequence-specific DNA binding; GO:0009791,post-embryonic development; GO:0006357,regulation of transcription by RNA polymerase II; GO:0006351,transcription, DNA-templated
gene-LOC100191736	GO:0031969,chloroplast membrane; GO:0016021,integral component of membrane; GO:0004252,serine-type endopeptidase activity
gene-LOC100191737	GO:0003682,chromatin binding; GO:0003723,RNA binding; GO:0016569,covalent chromatin modification; GO:0031936,negative regulation of chromatin silencing; GO:1905642,negative regulation of DNA methylation; GO:0044030,regulation of DNA methylation; GO:0051570,regulation of histone H3-K9 methylation; GO:0031060,regulation of histone methylation; GO:0006351,transcription, DNA-templated
gene-LOC100191738	GO:0005783,endoplasmic reticulum; GO:0016021,integral component of membrane; GO:0016020,membrane; GO:0102336,3-oxo-arachidoyl-CoA synthase activity; GO:0102337,3-oxo-cerotoyl-CoA synthase activity; GO:0102338,3-oxo-lignoceronyl-CoA synthase activity; GO:0009922,fatty acid elongase activity; GO:0102756,very-long-chain 3-ketoacyl-CoA synthase activity; GO:0006633,fatty acid biosynthetic process; GO…
gene-LOC100191740	GO:0016021,integral component of membrane; GO:0016020,membrane; GO:0090447,glycerol-3-phosphate 2-O-acyltransferase activity; GO:0004366,glycerol-3-phosphate O-acyltransferase activity; GO:0016791,phosphatase activity; GO:0102420,sn-1-glycerol-3-phosphate C16:0-DCA-CoA acyl transferase activity; GO:0016024,CDP-diacylglycerol biosynthetic process; GO:0010143,cutin biosynthetic process; GO:0016311,…
gene-LOC100191741	GO:0009507,chloroplast; GO:0005886,plasma membrane; GO:0016787,hydrolase activity
gene-LOC100191742	GO:0005739,mitochondrion; GO:0005634,nucleus; GO:0004519,endonuclease activity; GO:0003723,RNA binding; GO:0051301,cell division; GO:0009793,embryo development ending in seed dormancy; GO:0006355,regulation of transcription, DNA-templated; GO:0009451,RNA modification; GO:0006351,transcription, DNA-templated
gene-LOC100191743	GO:0009507,chloroplast; GO:0009543,chloroplast thylakoid lumen; GO:0009579,thylakoid; GO:0031977,thylakoid lumen
gene-LOC100191746	GO:0005829,cytosol; GO:0016021,integral component of membrane; GO:0005886,plasma membrane; GO:0005524,ATP binding; GO:0004672,protein kinase activity
gene-LOC100191747	GO:0070652,HAUS complex; GO:0009524,phragmoplast; GO:0005876,spindle microtubule; GO:0051011,microtubule minus-end binding; GO:0051301,cell division; GO:0051225,spindle assembly
gene-LOC100191748	GO:0005576,extracellular region; GO:0016788,hydrolase activity, acting on ester bonds; GO:0016042,lipid catabolic process
gene-LOC100191749	GO:0016021,integral component of membrane; GO:0018685,alkane 1-monooxygenase activity; GO:0020037,heme binding; GO:0005506,iron ion binding; GO:0010584,pollen exine formation; GO:0080110,sporopollenin biosynthetic process
gene-LOC100191750	GO:0047672,anthranilate N-benzoyltransferase activity; GO:0009813,flavonoid biosynthetic process
gene-LOC100191751	GO:0005887,integral component of plasma membrane; GO:0005622,intracellular; GO:0005262,calcium channel activity; GO:0005516,calmodulin binding; GO:0030552,cAMP binding; GO:0030553,cGMP binding; GO:0005222,intracellular cAMP-activated cation channel activity; GO:0005221,intracellular cyclic nucleotide activated cation channel activity; GO:0005242,inward rectifier potassium channel activity; GO:007…
gene-LOC100191752	GO:0005658,alpha DNA polymerase:primase complex; GO:0051539,4 iron, 4 sulfur cluster binding; GO:0003896,DNA primase activity; GO:0003887,DNA-directed DNA polymerase activity; GO:0046872,metal ion binding; GO:0003697,single-stranded DNA binding
gene-LOC100191753	GO:0046658,anchored component of plasma membrane; GO:0005618,cell wall; GO:0005737,cytoplasm; GO:0005576,extracellular region; GO:0005634,nucleus; GO:0042973,glucan endo-1,3-beta-D-glucosidase activity; GO:0004553,hydrolase activity, hydrolyzing O-glycosyl compounds; GO:0030247,polysaccharide binding; GO:0005975,carbohydrate metabolic process; GO:0071555,cell wall organization; GO:0006952,defense…
gene-LOC100191754	GO:0009507,chloroplast; GO:0052656,L-isoleucine transaminase activity; GO:0052654,L-leucine transaminase activity; GO:0052655,L-valine transaminase activity; GO:0009097,isoleucine biosynthetic process; GO:0009098,leucine biosynthetic process; GO:0009099,valine biosynthetic process
gene-LOC100191755	GO:0005622,intracellular; GO:0005524,ATP binding; GO:0004674,protein serine/threonine kinase activity; GO:0035556,intracellular signal transduction; GO:0018105,peptidyl-serine phosphorylation; GO:0018107,peptidyl-threonine phosphorylation
gene-LOC100191756	GO:0005793,endoplasmic reticulum-Golgi intermediate compartment; GO:0016021,integral component of membrane; GO:0008643,carbohydrate transport; GO:0015786,UDP-glucose transmembrane transport
gene-LOC100191757	GO:0009507,chloroplast; GO:0009570,chloroplast stroma; GO:0031071,cysteine desulfurase activity; GO:0030170,pyridoxal phosphate binding; GO:0009000,selenocysteine lyase activity; GO:0006534,cysteine metabolic process; GO:0018283,iron incorporation into metallo-sulfur cluster; GO:0010269,response to selenium ion; GO:0001887,selenium compound metabolic process; GO:0006790,sulfur compound metabolic …
gene-LOC100191759	GO:0005576,extracellular region; GO:0003993,acid phosphatase activity; GO:0046872,metal ion binding
gene-LOC100191760	GO:0005783,endoplasmic reticulum; GO:0005789,endoplasmic reticulum membrane; GO:0016021,integral component of membrane
gene-LOC100191761	GO:0009570,chloroplast stroma; GO:0005634,nucleus; GO:0005524,ATP binding; GO:0004386,helicase activity; GO:0003723,RNA binding; GO:0008270,zinc ion binding; GO:0009658,chloroplast organization; GO:0000373,Group II intron splicing; GO:0042254,ribosome biogenesis
gene-LOC100191763	GO:0030123,AP-3 adaptor complex; GO:0030659,cytoplasmic vesicle membrane; GO:0005794,Golgi apparatus; GO:0008565,protein transporter activity; GO:0006886,intracellular protein transport; GO:0016192,vesicle-mediated transport
gene-LOC100191764	GO:0048046,apoplast; GO:0009505,plant-type cell wall; GO:0005773,vacuole; GO:0052692,raffinose alpha-galactosidase activity; GO:0005975,carbohydrate metabolic process; GO:0071555,cell wall organization
gene-LOC100191765	GO:0005829,cytosol; GO:0030267,glyoxylate reductase (NADP) activity; GO:0016618,hydroxypyruvate reductase activity; GO:0051287,NAD binding; GO:0009854,oxidative photosynthetic carbon pathway; GO:0009853,photorespiration
gene-LOC100191766	GO:0005829,cytosol; GO:0000932,P-body; GO:0003729,mRNA binding; GO:0042803,protein homodimerization activity; GO:0033962,cytoplasmic mRNA processing body assembly; GO:0031087,deadenylation-independent decapping of nuclear-transcribed mRNA; GO:0006397,mRNA processing; GO:0017148,negative regulation of translation; GO:0010606,positive regulation of cytoplasmic mRNA processing body assembly
gene-LOC100191767	GO:0003676,nucleic acid binding
gene-LOC100191769	GO:0005576,extracellular region; GO:0020037,heme binding; GO:0046872,metal ion binding; GO:0004601,peroxidase activity; GO:0042744,hydrogen peroxide catabolic process; GO:0006979,response to oxidative stress
gene-LOC100191770	GO:0005794,Golgi apparatus; GO:0005886,plasma membrane; GO:0005773,vacuole; GO:0005525,GTP binding; GO:0016004,phospholipase activator activity; GO:0015031,protein transport; GO:0007264,small GTPase mediated signal transduction; GO:0016192,vesicle-mediated transport
gene-LOC100191771	GO:0005576,extracellular region; GO:0008126,acetylesterase activity; GO:0006631,fatty acid metabolic process; GO:0016042,lipid catabolic process
gene-LOC100191772	GO:0009570,chloroplast stroma; GO:0008835,diaminohydroxyphosphoribosylaminopyrimidine deaminase activity; GO:0008270,zinc ion binding; GO:0055114,oxidation-reduction process; GO:0009231,riboflavin biosynthetic process
gene-LOC100191773	GO:0007142,male meiosis II; GO:0009556,microsporogenesis; GO:0006355,regulation of transcription, DNA-templated
gene-LOC100191776	GO:0005886,plasma membrane; GO:0009626,plant-type hypersensitive response
gene-LOC100191777	GO:0003677,DNA binding; GO:0046872,metal ion binding; GO:0003723,RNA binding
gene-LOC100191778	GO:0031225,anchored component of membrane; GO:0005886,plasma membrane; GO:0004190,aspartic-type endopeptidase activity; GO:0030163,protein catabolic process; GO:0006508,proteolysis
gene-LOC100191779	GO:0048046,apoplast; GO:0005507,copper ion binding; GO:0052716,hydroquinone:oxygen oxidoreductase activity; GO:0016722,oxidoreductase activity, oxidizing metal ions; GO:0046274,lignin catabolic process
gene-LOC100191780	GO:0016020,membrane; GO:0005739,mitochondrion; GO:0004519,endonuclease activity; GO:0003723,RNA binding; GO:0080156,mitochondrial mRNA modification
gene-LOC100191781	GO:0005768,endosome; GO:0005794,Golgi apparatus; GO:0000139,Golgi membrane; GO:0016021,integral component of membrane; GO:0005802,trans-Golgi network; GO:0047262,polygalacturonate 4-alpha-galacturonosyltransferase activity; GO:0010289,homogalacturonan biosynthetic process
gene-LOC100191782	GO:0005634,nucleus; GO:0003677,DNA binding; GO:0048262,determination of dorsal/ventral asymmetry; GO:0009908,flower development; GO:0006355,regulation of transcription, DNA-templated; GO:0006351,transcription, DNA-templated
gene-LOC100191783	GO:0016021,integral component of membrane; GO:0009705,plant-type vacuole membrane; GO:0005886,plasma membrane; GO:0022821,potassium ion antiporter activity; GO:0010540,basipetal auxin transport; GO:0009630,gravitropism; GO:0090333,regulation of stomatal closure; GO:0080167,response to karrikin; GO:0009414,response to water deprivation; GO:0048364,root development
gene-LOC100191784	GO:0005634,nucleus; GO:0003677,DNA binding; GO:0009734,auxin-activated signaling pathway; GO:0006355,regulation of transcription, DNA-templated; GO:0006351,transcription, DNA-templated
gene-LOC100191786	GO:0005634,nucleus; GO:0003677,DNA binding; GO:0003700,DNA-binding transcription factor activity; GO:0043565,sequence-specific DNA binding; GO:0010043,response to zinc ion; GO:0006351,transcription, DNA-templated
gene-LOC100191787	GO:0005783,endoplasmic reticulum; GO:0016021,integral component of membrane; GO:0005886,plasma membrane; GO:0010329,auxin efflux transmembrane transporter activity; GO:0010252,auxin homeostasis; GO:0009926,auxin polar transport; GO:0009734,auxin-activated signaling pathway
gene-LOC100191789	GO:0047037,salutaridine reductase (NADPH) activity; GO:0009820,alkaloid metabolic process
gene-LOC100191790	GO:0016021,integral component of membrane
gene-LOC100191791	GO:0016020,membrane; GO:0020037,heme binding; GO:0005506,iron ion binding; GO:0033773,isoflavone 2'-hydroxylase activity
gene-LOC100191793	GO:0016021,integral component of membrane
gene-LOC100191794	GO:0005794,Golgi apparatus; GO:0000139,Golgi membrane; GO:0016021,integral component of membrane; GO:0047262,polygalacturonate 4-alpha-galacturonosyltransferase activity; GO:0016757,transferase activity, transferring glycosyl groups; GO:0071555,cell wall organization; GO:0045489,pectin biosynthetic process; GO:0000271,polysaccharide biosynthetic process
gene-LOC100191795	GO:0005737,cytoplasm; GO:0005524,ATP binding; GO:0004709,MAP kinase kinase kinase activity; GO:0004674,protein serine/threonine kinase activity; GO:0032147,activation of protein kinase activity; GO:0007346,regulation of mitotic cell cycle; GO:0023014,signal transduction by protein phosphorylation; GO:0031098,stress-activated protein kinase signaling cascade
gene-LOC100191797	GO:0009507,chloroplast; GO:0009534,chloroplast thylakoid; GO:0009535,chloroplast thylakoid membrane; GO:0005634,nucleus; GO:0009579,thylakoid; GO:0031977,thylakoid lumen; GO:0042802,identical protein binding; GO:0004252,serine-type endopeptidase activity; GO:0008236,serine-type peptidase activity; GO:0010206,photosystem II repair; GO:0030163,protein catabolic process; GO:0009735,response to cytok…
gene-LOC100191798	GO:0005737,cytoplasm; GO:0005829,cytosol; GO:0005730,nucleolus; GO:0005681,spliceosomal complex; GO:0005524,ATP binding; GO:0004004,ATP-dependent RNA helicase activity; GO:0003723,RNA binding; GO:0006397,mRNA processing; GO:0006396,RNA processing; GO:0008380,RNA splicing
gene-LOC100191799	GO:0005768,endosome; GO:0005794,Golgi apparatus; GO:0000139,Golgi membrane; GO:0016021,integral component of membrane; GO:0005802,trans-Golgi network; GO:0016757,transferase activity, transferring glycosyl groups; GO:0042546,cell wall biogenesis; GO:0071555,cell wall organization; GO:0080147,root hair cell development
gene-LOC100191802	GO:0005789,endoplasmic reticulum membrane; GO:0005794,Golgi apparatus; GO:0016021,integral component of membrane; GO:0005730,nucleolus; GO:0009505,plant-type cell wall; GO:0009506,plasmodesma; GO:0005774,vacuolar membrane; GO:0016757,transferase activity, transferring glycosyl groups; GO:0009664,plant-type cell wall organization; GO:0018279,protein N-linked glycosylation via asparagine; GO:000982…
gene-LOC100191804	GO:0005509,calcium ion binding
gene-LOC100191806	GO:0005737,cytoplasm; GO:0005634,nucleus; GO:0019774,proteasome core complex, beta-subunit complex; GO:0004298,threonine-type endopeptidase activity; GO:0051603,proteolysis involved in cellular protein catabolic process
gene-LOC100191807	GO:0005829,cytosol; GO:0009331,glycerol-3-phosphate dehydrogenase complex; GO:0004367,glycerol-3-phosphate dehydrogenase [NAD+] activity; GO:0051287,NAD binding; GO:0005975,carbohydrate metabolic process; GO:0046168,glycerol-3-phosphate catabolic process
gene-LOC100191808	GO:0005737,cytoplasm; GO:0009506,plasmodesma; GO:0046914,transition metal ion binding; GO:0046916,cellular transition metal ion homeostasis; GO:0030001,metal ion transport
gene-LOC100191809	GO:0009507,chloroplast; GO:0005737,cytoplasm; GO:0005730,nucleolus; GO:0005524,ATP binding; GO:0004004,ATP-dependent RNA helicase activity; GO:0046872,metal ion binding; GO:0003723,RNA binding; GO:0006396,RNA processing
gene-LOC100191810	GO:0004812,aminoacyl-tRNA ligase activity
gene-LOC100191812	GO:0016021,integral component of membrane; GO:0009705,plant-type vacuole membrane; GO:0005774,vacuolar membrane; GO:0046786,viral replication complex formation and maintenance
gene-LOC100191813	GO:0008233,peptidase activity
gene-LOC100191814	GO:0005840,ribosome
gene-LOC100191816	GO:0033855,nicotianamine aminotransferase activity; GO:0030170,pyridoxal phosphate binding; GO:0009058,biosynthetic process; GO:0006520,cellular amino acid metabolic process
gene-LOC100191817	GO:0016021,integral component of membrane; GO:0005774,vacuolar membrane; GO:0022857,transmembrane transporter activity; GO:0008643,carbohydrate transport; GO:0055062,phosphate ion homeostasis
gene-LOC100191818	GO:0005737,cytoplasm; GO:0005778,peroxisomal membrane; GO:0005524,ATP binding; GO:0061630,ubiquitin protein ligase activity; GO:0031625,ubiquitin protein ligase binding; GO:0004842,ubiquitin-protein transferase activity; GO:0006635,fatty acid beta-oxidation; GO:0007031,peroxisome organization; GO:0016558,protein import into peroxisome matrix; GO:0016567,protein ubiquitination
gene-LOC100191819	GO:0009507,chloroplast; GO:0009570,chloroplast stroma; GO:0019172,glyoxalase III activity
gene-LOC100191820	GO:0005634,nucleus; GO:0003723,RNA binding
gene-LOC100191821	GO:0043231,intracellular membrane-bounded organelle; GO:0004519,endonuclease activity; GO:0003723,RNA binding; GO:0009451,RNA modification
gene-LOC100191822	GO:0005685,U1 snRNP; GO:0003729,mRNA binding; GO:0006376,mRNA splice site selection
gene-LOC100191823	GO:0005737,cytoplasm; GO:0051539,4 iron, 4 sulfur cluster binding; GO:0046872,metal ion binding; GO:0016740,transferase activity; GO:0000079,regulation of cyclin-dependent protein serine/threonine kinase activity; GO:0006400,tRNA modification
gene-LOC100191824	GO:0031225,anchored component of membrane; GO:0046658,anchored component of plasma membrane; GO:0009055,electron transfer activity; GO:0046872,metal ion binding
gene-LOC100191825	GO:0009507,chloroplast; GO:0005524,ATP binding; GO:0031072,heat shock protein binding; GO:0046872,metal ion binding; GO:0051082,unfolded protein binding; GO:0006457,protein folding; GO:0009408,response to heat
gene-LOC100191826	GO:0009507,chloroplast; GO:0005739,mitochondrion; GO:0005840,ribosome; GO:0019843,rRNA binding; GO:0003735,structural constituent of ribosome; GO:0006412,translation
gene-LOC100191827	GO:0005737,cytoplasm; GO:0005874,microtubule; GO:0005886,plasma membrane
gene-LOC100191828	GO:0016021,integral component of membrane; GO:0005774,vacuolar membrane; GO:0005773,vacuole
gene-LOC100191829	GO:0005737,cytoplasm; GO:0046872,metal ion binding; GO:0004826,phenylalanine-tRNA ligase activity; GO:0006432,phenylalanyl-tRNA aminoacylation
gene-LOC100191830	GO:0000785,chromatin; GO:0005829,cytosol; GO:0005634,nucleus; GO:0003682,chromatin binding; GO:0005085,guanyl-nucleotide exchange factor activity; GO:0042802,identical protein binding; GO:0009881,photoreceptor activity; GO:0042803,protein homodimerization activity; GO:0009649,entrainment of circadian clock; GO:0018298,protein-chromophore linkage; GO:0009411,response to UV; GO:0010224,response to …
gene-LOC100191831	GO:0030410,nicotianamine synthase activity; GO:0030418,nicotianamine biosynthetic process
gene-LOC100191832	GO:0005730,nucleolus; GO:0004521,endoribonuclease activity; GO:0000479,endonucleolytic cleavage of tricistronic rRNA transcript (SSU-rRNA, 5.8S rRNA, LSU-rRNA)
gene-LOC100191833	GO:0009507,chloroplast
gene-LOC100191834	GO:0016021,integral component of membrane; GO:0005506,iron ion binding
gene-LOC100191835	GO:0005524,ATP binding
gene-LOC100191836	GO:0005509,calcium ion binding
gene-LOC100191837	GO:0016021,integral component of membrane; GO:0042936,NA; GO:0022857,transmembrane transporter activity; GO:0042937,tripeptide transmembrane transporter activity; GO:0042742,defense response to bacterium; GO:0042938,dipeptide transport; GO:0042538,hyperosmotic salinity response; GO:0009737,response to abscisic acid; GO:0080052,response to histidine; GO:0009753,response to jasmonic acid; GO:004320…
gene-LOC100191838	GO:0005829,cytosol; GO:0005524,ATP binding; GO:0046872,metal ion binding; GO:0004478,methionine adenosyltransferase activity; GO:0006730,one-carbon metabolic process; GO:0006556,S-adenosylmethionine biosynthetic process
gene-LOC100191839	GO:0005834,heterotrimeric G-protein complex; GO:0005886,plasma membrane; GO:0004871,NA; GO:0007186,G protein-coupled receptor signaling pathway
gene-LOC100191840	GO:0005525,GTP binding
gene-LOC100191841	GO:0009507,chloroplast; GO:0005739,mitochondrion; GO:0005524,ATP binding; GO:0004449,isocitrate dehydrogenase (NAD+) activity; GO:0000287,magnesium ion binding; GO:0051287,NAD binding; GO:0008270,zinc ion binding; GO:0006102,isocitrate metabolic process; GO:0006099,tricarboxylic acid cycle
gene-LOC100191842	GO:0009507,chloroplast; GO:0047714,galactolipase activity; GO:0008970,phospholipase A1 activity; GO:0004806,triglyceride lipase activity; GO:0016042,lipid catabolic process
gene-LOC100191843	GO:0005794,Golgi apparatus; GO:0000139,Golgi membrane; GO:0016021,integral component of membrane; GO:0016413,O-acetyltransferase activity; GO:1990538,xylan O-acetyltransferase activity; GO:0045893,positive regulation of transcription, DNA-templated; GO:0009409,response to cold; GO:0050826,response to freezing; GO:0045492,xylan biosynthetic process
gene-LOC100191844	GO:0010008,endosome membrane; GO:0000139,Golgi membrane; GO:0016021,integral component of membrane
gene-LOC100191845	GO:0030665,clathrin-coated vesicle membrane; GO:0005768,endosome; GO:0005794,Golgi apparatus; GO:0000139,Golgi membrane; GO:0016021,integral component of membrane; GO:0031902,late endosome membrane; GO:0016020,membrane; GO:0005802,trans-Golgi network; GO:0005509,calcium ion binding; GO:0006623,protein targeting to vacuole
gene-LOC100191846	GO:0005737,cytoplasm; GO:0003983,UTP:glucose-1-phosphate uridylyltransferase activity; GO:0006011,UDP-glucose metabolic process
gene-LOC100191847	GO:0016021,integral component of membrane; GO:0005886,plasma membrane; GO:0022857,transmembrane transporter activity
gene-LOC100191848	GO:0005789,endoplasmic reticulum membrane; GO:0000139,Golgi membrane; GO:0005886,plasma membrane; GO:0005525,GTP binding; GO:0003924,GTPase activity; GO:0006888,ER to Golgi vesicle-mediated transport; GO:0015031,protein transport
gene-LOC100191849	GO:0005777,peroxisome; GO:0003987,acetate-CoA ligase activity; GO:0047760,butyrate-CoA ligase activity; GO:0006083,acetate metabolic process; GO:0019605,butyrate metabolic process; GO:0006097,glyoxylate cycle
gene-LOC100191850	GO:0005777,peroxisome; GO:0005524,ATP binding; GO:0004321,fatty-acyl-CoA synthase activity; GO:0016874,ligase activity; GO:0009695,jasmonic acid biosynthetic process
gene-LOC100191851	GO:0005737,cytoplasm; GO:0003872,6-phosphofructokinase activity; GO:0005524,ATP binding; GO:0047334,diphosphate-fructose-6-phosphate 1-phosphotransferase activity; GO:0046872,metal ion binding
gene-LOC100191852	GO:0016021,integral component of membrane; GO:0005886,plasma membrane; GO:0005524,ATP binding; GO:0004675,transmembrane receptor protein serine/threonine kinase activity; GO:0007166,cell surface receptor signaling pathway; GO:0006468,protein phosphorylation
gene-LOC100191853	GO:0016021,integral component of membrane; GO:0005886,plasma membrane; GO:0005524,ATP binding; GO:0004674,protein serine/threonine kinase activity
gene-LOC100191855	GO:0005634,nucleus; GO:0000974,Prp19 complex; GO:0071006,U2-type catalytic step 1 spliceosome; GO:0061630,ubiquitin protein ligase activity; GO:0004842,ubiquitin-protein transferase activity; GO:0006281,DNA repair; GO:0000349,generation of catalytic spliceosome for first transesterification step; GO:0045087,innate immune response; GO:0070534,protein K63-linked ubiquitination; GO:0016567,protein u…
gene-LOC100191856	GO:0005737,cytoplasm; GO:0005829,cytosol; GO:0004106,chorismate mutase activity; GO:0009073,aromatic amino acid family biosynthetic process; GO:0046417,chorismate metabolic process
gene-LOC100191857	GO:0016021,integral component of membrane
gene-LOC100191858	GO:0005681,spliceosomal complex; GO:0089701,U2AF; GO:0003677,DNA binding; GO:0046872,metal ion binding; GO:0030628,pre-mRNA 3'-splice site binding; GO:0000398,mRNA splicing, via spliceosome
gene-LOC100191859	GO:0009707,chloroplast outer membrane; GO:0005739,mitochondrion; GO:0009658,chloroplast organization
gene-LOC100191860	GO:0009507,chloroplast; GO:0005829,cytosol; GO:0005524,ATP binding; GO:0005525,GTP binding; GO:0016757,transferase activity, transferring glycosyl groups; GO:0004849,uridine kinase activity; GO:0006207,'de novo' pyrimidine nucleobase biosynthetic process; GO:0044211,CTP salvage; GO:2001006,regulation of cellulose biosynthetic process; GO:1901141,regulation of lignin biosynthetic process; GO:20009…
gene-LOC100191861	GO:0016021,integral component of membrane; GO:0015098,molybdate ion transmembrane transporter activity
gene-LOC100191862	GO:0005737,cytoplasm; GO:0005886,plasma membrane; GO:0070403,NAD+ binding; GO:0048040,UDP-glucuronate decarboxylase activity; GO:0042732,D-xylose metabolic process; GO:0033320,UDP-D-xylose biosynthetic process
gene-LOC100191864	GO:0046872,metal ion binding; GO:0003676,nucleic acid binding; GO:0004523,RNA-DNA hybrid ribonuclease activity
gene-LOC100191865	GO:0016021,integral component of membrane; GO:0005886,plasma membrane; GO:0046872,metal ion binding; GO:0061630,ubiquitin protein ligase activity; GO:0004842,ubiquitin-protein transferase activity; GO:0006952,defense response; GO:0043068,positive regulation of programmed cell death; GO:0012501,programmed cell death; GO:0043161,proteasome-mediated ubiquitin-dependent protein catabolic process; GO:…
gene-LOC100191866	GO:0005768,endosome; GO:0005794,Golgi apparatus; GO:0005635,nuclear envelope; GO:0005637,nuclear inner membrane; GO:0005886,plasma membrane; GO:0005802,trans-Golgi network; GO:0071763,nuclear membrane organization
gene-LOC100191868	GO:0005886,plasma membrane; GO:0046872,metal ion binding; GO:0061630,ubiquitin protein ligase activity; GO:0009561,megagametogenesis; GO:0055046,microgametogenesis; GO:0043161,proteasome-mediated ubiquitin-dependent protein catabolic process; GO:0000209,protein polyubiquitination; GO:0042787,NA; GO:0051603,proteolysis involved in cellular protein catabolic process; GO:0051726,regulation of cell c…
gene-LOC100191869	GO:0005634,nucleus; GO:0010030,positive regulation of seed germination; GO:0045893,positive regulation of transcription, DNA-templated; GO:0006351,transcription, DNA-templated
gene-LOC100191870	GO:0016021,integral component of membrane; GO:0005886,plasma membrane; GO:0015079,potassium ion transmembrane transporter activity
gene-LOC100191871	GO:0005769,early endosome; GO:0000814,ESCRT II complex; GO:0005770,late endosome; GO:0031902,late endosome membrane; GO:0005886,plasma membrane; GO:0032266,phosphatidylinositol-3-phosphate binding; GO:0043130,ubiquitin binding; GO:0009793,embryo development ending in seed dormancy; GO:0071985,multivesicular body sorting pathway; GO:0043328,protein transport to vacuole involved in ubiquitin-depend…
gene-LOC100191872	GO:0005634,nucleus; GO:0003677,DNA binding; GO:0003700,DNA-binding transcription factor activity; GO:0042803,protein homodimerization activity; GO:0071219,cellular response to molecule of bacterial origin; GO:0006952,defense response; GO:0050777,negative regulation of immune response; GO:0045892,negative regulation of transcription, DNA-templated; GO:0006355,regulation of transcription, DNA-templ…
gene-LOC100191873	GO:0005634,nucleus; GO:0003700,DNA-binding transcription factor activity; GO:0046872,metal ion binding; GO:0044212,transcription regulatory region DNA binding; GO:0006355,regulation of transcription, DNA-templated; GO:0006351,transcription, DNA-templated
gene-LOC100191874	GO:0009507,chloroplast; GO:0005739,mitochondrion; GO:0043022,ribosome binding; GO:0003743,translation initiation factor activity; GO:0032790,ribosome disassembly
gene-LOC100191875	GO:0009507,chloroplast; GO:0052923,all-trans-nonaprenyl-diphosphate synthase (geranyl-diphosphate specific) activity; GO:0046872,metal ion binding; GO:0050347,trans-octaprenyltranstransferase activity; GO:0008299,isoprenoid biosynthetic process; GO:0015979,photosynthesis
gene-LOC100191876	GO:0003677,DNA binding
gene-LOC100191877	GO:0009507,chloroplast; GO:0003942,N-acetyl-gamma-glutamyl-phosphate reductase activity; GO:0051287,NAD binding; GO:0046983,protein dimerization activity; GO:0006526,arginine biosynthetic process
gene-LOC100191878	GO:0005737,cytoplasm; GO:0005634,nucleus; GO:0097100,supercoiled DNA binding; GO:0045892,negative regulation of transcription, DNA-templated; GO:2000033,regulation of seed dormancy process; GO:0006351,transcription, DNA-templated; GO:0010089,xylem development
gene-LOC100191879	GO:0005618,cell wall; GO:0005576,extracellular region; GO:0005794,Golgi apparatus; GO:0009505,plant-type cell wall; GO:0009506,plasmodesma; GO:0004252,serine-type endopeptidase activity
gene-LOC100191880	GO:0005829,cytosol; GO:0019898,extrinsic component of membrane; GO:0005794,Golgi apparatus; GO:0016020,membrane; GO:0032585,multivesicular body membrane; GO:0030904,retromer complex; GO:0035091,phosphatidylinositol binding; GO:0005543,phospholipid binding; GO:0046982,protein heterodimerization activity; GO:0032502,developmental process; GO:0006897,endocytosis; GO:0045324,late endosome to vacuole …
gene-LOC100191882	GO:0000785,chromatin; GO:0005634,nucleus; GO:0051213,dioxygenase activity; GO:0032454,histone demethylase activity (H3-K9 specific); GO:0046872,metal ion binding; GO:0000976,transcription regulatory region sequence-specific DNA binding; GO:0060969,negative regulation of gene silencing; GO:0006355,regulation of transcription, DNA-templated; GO:0006351,transcription, DNA-templated
gene-LOC100191885	GO:0045551,cinnamyl-alcohol dehydrogenase activity; GO:0052747,sinapyl alcohol dehydrogenase activity; GO:0008270,zinc ion binding; GO:0009809,lignin biosynthetic process
gene-LOC100191886	GO:0016021,integral component of membrane; GO:0005886,plasma membrane
gene-LOC100191887	GO:0009507,chloroplast; GO:0031969,chloroplast membrane; GO:0047746,chlorophyllase activity; GO:0102293,pheophytinase b activity; GO:0015996,chlorophyll catabolic process
gene-LOC100191888	GO:0016831,carboxy-lyase activity; GO:0000287,magnesium ion binding; GO:0030976,thiamine pyrophosphate binding
gene-LOC100191890	GO:0000139,Golgi membrane; GO:0016021,integral component of membrane; GO:0016757,transferase activity, transferring glycosyl groups; GO:0071555,cell wall organization
gene-LOC100191891	GO:0005737,cytoplasm; GO:0005829,cytosol; GO:0005783,endoplasmic reticulum; GO:0005634,nucleus; GO:0003682,chromatin binding; GO:0003729,mRNA binding; GO:0043565,sequence-specific DNA binding; GO:0071395,cellular response to jasmonic acid stimulus; GO:0042742,defense response to bacterium; GO:0050832,defense response to fungus; GO:0045087,innate immune response; GO:0007275,multicellular organism …
gene-LOC100191892	GO:0005576,extracellular region; GO:0004252,serine-type endopeptidase activity
gene-LOC100191894	GO:0009507,chloroplast; GO:0009570,chloroplast stroma; GO:0003855,3-dehydroquinate dehydratase activity; GO:0050661,NADP binding; GO:0004764,shikimate 3-dehydrogenase (NADP+) activity; GO:0009073,aromatic amino acid family biosynthetic process; GO:0009423,chorismate biosynthetic process; GO:0009793,embryo development ending in seed dormancy; GO:0019632,shikimate metabolic process
gene-LOC100191895	GO:0031225,anchored component of membrane; GO:0005886,plasma membrane; GO:0004190,aspartic-type endopeptidase activity; GO:0030163,protein catabolic process; GO:0006508,proteolysis
gene-LOC100191896	GO:0006629,lipid metabolic process
gene-LOC100191897	GO:0006355,regulation of transcription, DNA-templated; GO:0006351,transcription, DNA-templated
gene-LOC100191898	GO:0005737,cytoplasm; GO:0005871,kinesin complex; GO:0005874,microtubule; GO:0005819,spindle; GO:0005524,ATP binding; GO:0008574,ATP-dependent microtubule motor activity, plus-end-directed; GO:0008017,microtubule binding; GO:0007018,microtubule-based movement
gene-LOC100191900	GO:0009570,chloroplast stroma; GO:0009536,plastid; GO:0004365,glyceraldehyde-3-phosphate dehydrogenase (NAD+) (phosphorylating) activity; GO:0051287,NAD binding; GO:0050661,NADP binding; GO:0080144,amino acid homeostasis; GO:0005975,carbohydrate metabolic process; GO:0006006,glucose metabolic process; GO:0006096,glycolytic process; GO:0080022,primary root development
gene-LOC100191901	GO:0016021,integral component of membrane; GO:0015297,antiporter activity; GO:0015238,drug transmembrane transporter activity; GO:0006855,drug transmembrane transport
gene-LOC100191902	GO:0005737,cytoplasm; GO:0046872,metal ion binding; GO:0004721,phosphoprotein phosphatase activity
gene-LOC100191903	GO:0035091,phosphatidylinositol binding
gene-LOC100191905	GO:0005576,extracellular region; GO:0020037,heme binding; GO:0046872,metal ion binding; GO:0004601,peroxidase activity; GO:0042744,hydrogen peroxide catabolic process; GO:0006979,response to oxidative stress
gene-LOC100191906	GO:0016021,integral component of membrane; GO:0005886,plasma membrane; GO:0019706,protein-cysteine S-palmitoyltransferase activity
gene-LOC100191907	GO:0016021,integral component of membrane; GO:0102336,3-oxo-arachidoyl-CoA synthase activity; GO:0102337,3-oxo-cerotoyl-CoA synthase activity; GO:0102338,3-oxo-lignoceronyl-CoA synthase activity; GO:0102756,very-long-chain 3-ketoacyl-CoA synthase activity; GO:0006633,fatty acid biosynthetic process
gene-LOC100191908	GO:0009507,chloroplast
gene-LOC100191909	GO:0005634,nucleus; GO:0003700,DNA-binding transcription factor activity; GO:0046983,protein dimerization activity; GO:0043565,sequence-specific DNA binding; GO:0006351,transcription, DNA-templated
gene-LOC100191910	GO:0034038,deoxyhypusine synthase activity; GO:0008612,peptidyl-lysine modification to peptidyl-hypusine
gene-LOC100191912	GO:0022625,cytosolic large ribosomal subunit; GO:0022626,cytosolic ribosome; GO:0003729,mRNA binding; GO:0003735,structural constituent of ribosome; GO:0006412,translation
gene-LOC100191913	GO:0005794,Golgi apparatus; GO:0016021,integral component of membrane; GO:1990538,xylan O-acetyltransferase activity; GO:0009834,plant-type secondary cell wall biogenesis; GO:1990937,xylan acetylation
gene-LOC100191914	GO:0005794,Golgi apparatus; GO:0000139,Golgi membrane; GO:0016021,integral component of membrane; GO:0047262,polygalacturonate 4-alpha-galacturonosyltransferase activity; GO:0016757,transferase activity, transferring glycosyl groups; GO:0071555,cell wall organization; GO:0045489,pectin biosynthetic process; GO:0000271,polysaccharide biosynthetic process
gene-LOC100191916	GO:0016021,integral component of membrane
gene-LOC100191917	GO:0016758,transferase activity, transferring hexosyl groups; GO:0008152,metabolic process
gene-LOC100191918	GO:0016567,protein ubiquitination
gene-LOC100191919	GO:0005634,nucleus; GO:0003677,DNA binding; GO:0003700,DNA-binding transcription factor activity; GO:0006952,defense response; GO:0009873,ethylene-activated signaling pathway; GO:0009867,jasmonic acid mediated signaling pathway; GO:0006351,transcription, DNA-templated
gene-LOC100191921	GO:0046872,metal ion binding; GO:0008233,peptidase activity; GO:0043130,ubiquitin binding; GO:0008285,negative regulation of cell proliferation; GO:0046621,negative regulation of organ growth; GO:0048482,plant ovule morphogenesis; GO:1900057,positive regulation of leaf senescence; GO:0048317,seed morphogenesis
gene-LOC100191922	GO:0005789,endoplasmic reticulum membrane; GO:0016021,integral component of membrane; GO:0004420,hydroxymethylglutaryl-CoA reductase (NADPH) activity; GO:0050661,NADP binding; GO:0015936,coenzyme A metabolic process; GO:0008299,isoprenoid biosynthetic process
gene-LOC100191923	GO:0003677,DNA binding; GO:0046872,metal ion binding
gene-LOC100191924	GO:0016021,integral component of membrane; GO:0005886,plasma membrane
gene-LOC100191925	GO:0000166,nucleotide binding; GO:0016491,oxidoreductase activity
gene-LOC100191926	GO:0005886,plasma membrane; GO:0046872,metal ion binding; GO:0061630,ubiquitin protein ligase activity; GO:0009561,megagametogenesis; GO:0055046,microgametogenesis; GO:0043161,proteasome-mediated ubiquitin-dependent protein catabolic process; GO:0000209,protein polyubiquitination; GO:0042787,NA; GO:0051603,proteolysis involved in cellular protein catabolic process; GO:0051726,regulation of cell c…
gene-LOC100191927	GO:0016021,integral component of membrane; GO:0005886,plasma membrane; GO:0005524,ATP binding; GO:0004674,protein serine/threonine kinase activity; GO:0006468,protein phosphorylation
gene-LOC100191928	GO:0016021,integral component of membrane; GO:0016757,transferase activity, transferring glycosyl groups
gene-LOC100191929	GO:0005783,endoplasmic reticulum; GO:0016021,integral component of membrane; GO:0006886,intracellular protein transport
gene-LOC100191930	GO:0005886,plasma membrane; GO:0009860,pollen tube growth; GO:0031347,regulation of defense response
gene-LOC100191931	GO:0005737,cytoplasm; GO:0005634,nucleus; GO:0009734,auxin-activated signaling pathway; GO:0007275,multicellular organism development; GO:0040008,regulation of growth; GO:1900140,regulation of seedling development
gene-LOC100191932	GO:0030170,pyridoxal phosphate binding
gene-LOC100191933	GO:0005618,cell wall; GO:0005576,extracellular region; GO:0004650,polygalacturonase activity; GO:0071555,cell wall organization; GO:0008152,metabolic process; GO:0009556,microsporogenesis; GO:0010584,pollen exine formation
gene-LOC100191934	GO:0005829,cytosol; GO:0005634,nucleus; GO:0042054,histone methyltransferase activity; GO:0008469,histone-arginine N-methyltransferase activity; GO:0035242,protein-arginine omega-N asymmetric methyltransferase activity; GO:0034969,histone arginine methylation; GO:0006355,regulation of transcription, DNA-templated; GO:0006351,transcription, DNA-templated
gene-LOC100191935	GO:0016021,integral component of membrane
gene-LOC100191936	GO:0000228,nuclear chromosome; GO:0043044,ATP-dependent chromatin remodeling; GO:0007049,cell cycle; GO:0016569,covalent chromatin modification; GO:0006281,DNA repair; GO:0006337,nucleosome disassembly; GO:0006357,regulation of transcription by RNA polymerase II; GO:0006351,transcription, DNA-templated
gene-LOC100191937	GO:0005634,nucleus; GO:0003700,DNA-binding transcription factor activity; GO:0043565,sequence-specific DNA binding; GO:0006351,transcription, DNA-templated
gene-LOC100191938	GO:0046658,anchored component of plasma membrane; GO:0051716,cellular response to stimulus
gene-LOC100191939	GO:0005622,intracellular; GO:0005886,plasma membrane; GO:0004435,phosphatidylinositol phospholipase C activity; GO:0004629,phospholipase C activity; GO:0004871,NA; GO:0009738,abscisic acid-activated signaling pathway; GO:0035556,intracellular signal transduction; GO:0016042,lipid catabolic process; GO:0009737,response to abscisic acid; GO:0009409,response to cold; GO:0009651,response to salt stre…
gene-LOC100191940	GO:0005783,endoplasmic reticulum; GO:0016021,integral component of membrane; GO:0005524,ATP binding; GO:0016887,ATPase activity; GO:0009737,response to abscisic acid; GO:0000304,response to singlet oxygen
gene-LOC100191941	GO:0005794,Golgi apparatus; GO:0000139,Golgi membrane; GO:0016021,integral component of membrane; GO:0015020,glucuronosyltransferase activity; GO:0080116,glucuronoxylan glucuronosyltransferase activity; GO:0046872,metal ion binding; GO:0071555,cell wall organization; GO:0010417,glucuronoxylan biosynthetic process; GO:0009834,plant-type secondary cell wall biogenesis; GO:0045492,xylan biosynthetic…
gene-LOC100191942	GO:0009507,chloroplast; GO:0005739,mitochondrion; GO:0005524,ATP binding; GO:0050897,cobalt ion binding; GO:0004471,malate dehydrogenase (decarboxylating) (NAD+) activity; GO:0051287,NAD binding; GO:0042803,protein homodimerization activity; GO:0008270,zinc ion binding; GO:0006108,malate metabolic process; GO:0006090,pyruvate metabolic process; GO:0009651,response to salt stress
gene-LOC100191943	GO:0005737,cytoplasm; GO:0005665,RNA polymerase II, core complex; GO:0000418,RNA polymerase IV complex; GO:0000419,RNA polymerase V complex; GO:0005730,nucleolus; GO:0005634,nucleus; GO:0003677,DNA binding; GO:0003899,DNA-directed 5'-3' RNA polymerase activity; GO:0046983,protein dimerization activity; GO:0010374,stomatal complex development; GO:0010375,stomatal complex patterning; GO:0006366,tra…
gene-LOC100191944	GO:0016021,integral component of membrane; GO:0016020,membrane; GO:0005524,ATP binding; GO:0042626,ATPase activity, coupled to transmembrane movement of substances
gene-LOC100191945	GO:0016021,integral component of membrane
gene-LOC100191947	GO:0005737,cytoplasm; GO:0005634,nucleus; GO:0019773,proteasome core complex, alpha-subunit complex; GO:0004298,threonine-type endopeptidase activity; GO:0006511,ubiquitin-dependent protein catabolic process
gene-LOC100191949	GO:0000124,SAGA complex; GO:0005669,transcription factor TFIID complex; GO:0046982,protein heterodimerization activity; GO:0008134,transcription factor binding; GO:0044212,transcription regulatory region DNA binding; GO:0043966,histone H3 acetylation; GO:0045944,positive regulation of transcription by RNA polymerase II; GO:0051123,RNA polymerase II preinitiation complex assembly; GO:0006366,trans…
gene-LOC100191950	GO:0009331,glycerol-3-phosphate dehydrogenase complex; GO:0005743,mitochondrial inner membrane; GO:0005739,mitochondrion; GO:0004368,glycerol-3-phosphate dehydrogenase (quinone) activity; GO:0052591,sn-glycerol-3-phosphate:ubiquinone-8 oxidoreductase activity; GO:0019563,glycerol catabolic process; GO:0006127,glycerophosphate shuttle
gene-LOC100191951	GO:0005634,nucleus; GO:0005886,plasma membrane; GO:0005524,ATP binding; GO:0004693,cyclin-dependent protein serine/threonine kinase activity; GO:0042742,defense response to bacterium; GO:0002229,defense response to oomycetes; GO:1900426,positive regulation of defense response to bacterium; GO:1902290,positive regulation of defense response to oomycetes; GO:0006468,protein phosphorylation; GO:2000…
gene-LOC100191952	GO:0005737,cytoplasm; GO:0005847,mRNA cleavage and polyadenylation specificity factor complex; GO:0005634,nucleus; GO:0005516,calmodulin binding; GO:0003677,DNA binding; GO:0004519,endonuclease activity; GO:0004521,endoribonuclease activity; GO:0046872,metal ion binding; GO:0003729,mRNA binding; GO:0003723,RNA binding; GO:0031124,mRNA 3'-end processing; GO:0006378,mRNA polyadenylation; GO:0009626…
gene-LOC100191953	GO:0016021,integral component of membrane; GO:0005774,vacuolar membrane; GO:0005773,vacuole
gene-LOC100191954	GO:0035091,phosphatidylinositol binding
gene-LOC100191955	GO:0016747,transferase activity, transferring acyl groups other than amino-acyl groups
gene-LOC100191956	GO:0005634,nucleus; GO:0003729,mRNA binding; GO:0010029,regulation of seed germination; GO:0009737,response to abscisic acid; GO:0009651,response to salt stress; GO:0009414,response to water deprivation
gene-LOC100191957	GO:0016021,integral component of membrane
gene-LOC100191958	GO:0005840,ribosome; GO:0003735,structural constituent of ribosome; GO:0006412,translation
gene-LOC100191959	GO:0005829,cytosol; GO:0005524,ATP binding; GO:0046872,metal ion binding; GO:0061605,molybdopterin-synthase adenylyltransferase activity; GO:0061604,molybdopterin-synthase sulfurtransferase activity; GO:0004792,thiosulfate sulfurtransferase activity; GO:0008641,ubiquitin-like modifier activating enzyme activity; GO:0006777,Mo-molybdopterin cofactor biosynthetic process; GO:0002143,tRNA wobble pos…
gene-LOC100191960	GO:0005737,cytoplasm; GO:0047134,protein-disulfide reductase activity; GO:0004791,thioredoxin-disulfide reductase activity; GO:0045454,cell redox homeostasis
gene-LOC100191961	GO:0005783,endoplasmic reticulum; GO:0016021,integral component of membrane; GO:0043231,intracellular membrane-bounded organelle; GO:0031090,organelle membrane; GO:0080096,phosphatidate-sterol O-acyltransferase activity; GO:0004607,phosphatidylcholine-sterol O-acyltransferase activity; GO:0080095,phosphatidylethanolamine-sterol O-acyltransferase activity; GO:0010150,leaf senescence; GO:0016127,st…
gene-LOC100191962	GO:0031225,anchored component of membrane; GO:0005886,plasma membrane; GO:0045087,innate immune response
gene-LOC100191963	GO:0016020,membrane; GO:0004252,serine-type endopeptidase activity; GO:0008236,serine-type peptidase activity; GO:0009827,plant-type cell wall modification
gene-LOC100191964	GO:0043231,intracellular membrane-bounded organelle; GO:0050502,cis-zeatin O-beta-D-glucosyltransferase activity; GO:0080043,quercetin 3-O-glucosyltransferase activity; GO:0080044,quercetin 7-O-glucosyltransferase activity; GO:0050403,trans-zeatin O-beta-D-glucosyltransferase activity; GO:0035251,UDP-glucosyltransferase activity; GO:0008152,metabolic process; GO:0009636,response to toxic substanc…
gene-LOC100191966	GO:0016787,hydrolase activity
gene-LOC100191967	GO:0005789,endoplasmic reticulum membrane; GO:0016021,integral component of membrane; GO:0005774,vacuolar membrane; GO:0015171,amino acid transmembrane transporter activity; GO:0003333,amino acid transmembrane transport
gene-LOC100191968	GO:0016021,integral component of membrane
gene-LOC100191969	GO:0016021,integral component of membrane; GO:0016020,membrane; GO:0005385,zinc ion transmembrane transporter activity; GO:0071577,zinc ion transmembrane transport
gene-LOC100191970	GO:0005783,endoplasmic reticulum; GO:0005789,endoplasmic reticulum membrane; GO:0016021,integral component of membrane; GO:0046872,metal ion binding; GO:0052631,sphingolipid delta-8 desaturase activity; GO:0070417,cellular response to cold; GO:0030148,sphingolipid biosynthetic process
gene-LOC100191972	GO:0005737,cytoplasm; GO:0005634,nucleus; GO:0005524,ATP binding; GO:0004674,protein serine/threonine kinase activity; GO:0009738,abscisic acid-activated signaling pathway; GO:0035556,intracellular signal transduction; GO:0006468,protein phosphorylation
gene-LOC100191973	GO:0043565,sequence-specific DNA binding; GO:0006351,transcription, DNA-templated
gene-LOC100191974	GO:0005829,cytosol; GO:0005769,early endosome; GO:0016020,membrane; GO:0005802,trans-Golgi network; GO:0006887,exocytosis; GO:0080147,root hair cell development; GO:0048768,root hair cell tip growth; GO:0048767,root hair elongation; GO:0016192,vesicle-mediated transport
gene-LOC100191975	GO:0016021,integral component of membrane; GO:0020037,heme binding; GO:0005506,iron ion binding; GO:0008168,methyltransferase activity; GO:0008398,sterol 14-demethylase activity; GO:0016126,sterol biosynthetic process
gene-LOC100191976	GO:0048046,apoplast; GO:0005618,cell wall; GO:0030145,manganese ion binding; GO:0045735,nutrient reservoir activity
gene-LOC100191977	GO:0009507,chloroplast; GO:0009570,chloroplast stroma; GO:0005737,cytoplasm; GO:0004056,argininosuccinate lyase activity; GO:0042450,arginine biosynthetic process via ornithine
gene-LOC100191978	GO:0048046,apoplast; GO:0005618,cell wall; GO:0004553,hydrolase activity, hydrolyzing O-glycosyl compounds; GO:0016762,xyloglucan:xyloglucosyl transferase activity; GO:0042546,cell wall biogenesis; GO:0071555,cell wall organization; GO:0010087,phloem or xylem histogenesis; GO:0010411,xyloglucan metabolic process
gene-LOC100191979	GO:0004842,ubiquitin-protein transferase activity; GO:0031146,SCF-dependent proteasomal ubiquitin-dependent protein catabolic process
gene-LOC100191980	GO:0005737,cytoplasm; GO:0005634,nucleus; GO:0005886,plasma membrane; GO:0005524,ATP binding; GO:0004675,transmembrane receptor protein serine/threonine kinase activity; GO:0007166,cell surface receptor signaling pathway; GO:0006952,defense response; GO:0006468,protein phosphorylation
gene-LOC100191981	GO:0005768,endosome; GO:0005794,Golgi apparatus; GO:0016021,integral component of membrane; GO:0005802,trans-Golgi network; GO:0016413,O-acetyltransferase activity; GO:0071554,cell wall organization or biogenesis
gene-LOC100191982	GO:0005829,cytosol; GO:0003872,6-phosphofructokinase activity; GO:0005524,ATP binding; GO:0046872,metal ion binding; GO:0006002,fructose 6-phosphate metabolic process; GO:0006096,glycolytic process
gene-LOC100191983	GO:0016021,integral component of membrane; GO:0016757,transferase activity, transferring glycosyl groups
gene-LOC100191984	GO:0009535,chloroplast thylakoid membrane; GO:0009538,photosystem I reaction center; GO:0015979,photosynthesis
gene-LOC100191985	GO:0030154,cell differentiation; GO:0009908,flower development
gene-LOC100191986	GO:0005737,cytoplasm; GO:0005634,nucleus; GO:0005524,ATP binding; GO:0004674,protein serine/threonine kinase activity; GO:0009738,abscisic acid-activated signaling pathway; GO:0035556,intracellular signal transduction; GO:0006468,protein phosphorylation
gene-LOC100191987	GO:0009507,chloroplast; GO:0004400,histidinol-phosphate transaminase activity; GO:0080130,L-phenylalanine:2-oxoglutarate aminotransferase activity; GO:0030170,pyridoxal phosphate binding; GO:0000105,histidine biosynthetic process
gene-LOC100191988	GO:0005737,cytoplasm; GO:0005768,endosome; GO:0005794,Golgi apparatus; GO:0000139,Golgi membrane; GO:0016021,integral component of membrane; GO:0005802,trans-Golgi network; GO:0016757,transferase activity, transferring glycosyl groups; GO:0006004,fucose metabolic process; GO:0006486,protein glycosylation
gene-LOC100191989	GO:0005634,nucleus; GO:0042803,protein homodimerization activity; GO:0003743,translation initiation factor activity
gene-LOC100191990	GO:0016021,integral component of membrane; GO:0097708,intracellular vesicle; GO:0005886,plasma membrane; GO:0022857,transmembrane transporter activity; GO:0010336,gibberellic acid homeostasis; GO:0042128,nitrate assimilation
gene-LOC100191991	GO:0005829,cytosol; GO:0000159,protein phosphatase type 2A complex; GO:0019888,protein phosphatase regulator activity; GO:0032502,developmental process; GO:0000278,mitotic cell cycle; GO:0070262,peptidyl-serine dephosphorylation
gene-LOC100191992	GO:0000785,chromatin; GO:0005829,cytosol; GO:0005634,nucleus; GO:0003682,chromatin binding; GO:0005085,guanyl-nucleotide exchange factor activity; GO:0042802,identical protein binding; GO:0009881,photoreceptor activity; GO:0042803,protein homodimerization activity; GO:0009649,entrainment of circadian clock; GO:0018298,protein-chromophore linkage; GO:0009411,response to UV; GO:0010224,response to …
gene-LOC100191993	GO:0003677,DNA binding; GO:0046872,metal ion binding; GO:0003723,RNA binding
gene-LOC100191994	GO:0005576,extracellular region; GO:0003993,acid phosphatase activity; GO:0046872,metal ion binding
gene-LOC100191995	GO:0003677,DNA binding; GO:0046872,metal ion binding
gene-LOC100191996	GO:0016021,integral component of membrane
gene-LOC100191997	GO:0016207,4-coumarate-CoA ligase activity; GO:0005524,ATP binding; GO:0009698,phenylpropanoid metabolic process
gene-LOC100191998	GO:0005730,nucleolus; GO:0003729,mRNA binding; GO:0003723,RNA binding; GO:0006417,regulation of translation
gene-LOC100191999	GO:0016021,integral component of membrane; GO:0043231,intracellular membrane-bounded organelle; GO:0050502,cis-zeatin O-beta-D-glucosyltransferase activity; GO:0046527,glucosyltransferase activity; GO:0080043,quercetin 3-O-glucosyltransferase activity; GO:0080046,quercetin 4'-O-glucosyltransferase activity; GO:0080044,quercetin 7-O-glucosyltransferase activity; GO:0050403,trans-zeatin O-beta-D-gl…
gene-LOC100192000	GO:0009507,chloroplast; GO:0005829,cytosol; GO:0005634,nucleus; GO:0102229,amylopectin maltohydrolase activity; GO:0016161,beta-amylase activity; GO:0009414,response to water deprivation; GO:0005983,starch catabolic process
gene-LOC100192002	GO:0005783,endoplasmic reticulum; GO:0016021,integral component of membrane; GO:0005886,plasma membrane; GO:0005524,ATP binding; GO:0005388,calcium-transporting ATPase activity; GO:0046872,metal ion binding
gene-LOC100192004	GO:0005737,cytoplasm; GO:0004161,dimethylallyltranstransferase activity; GO:0004337,geranyltranstransferase activity; GO:0046872,metal ion binding; GO:0006695,cholesterol biosynthetic process; GO:0045337,farnesyl diphosphate biosynthetic process; GO:0033384,geranyl diphosphate biosynthetic process
gene-LOC100192005	GO:0016021,integral component of membrane; GO:0009705,plant-type vacuole membrane; GO:0005886,plasma membrane; GO:0022821,potassium ion antiporter activity; GO:0010540,basipetal auxin transport; GO:0009630,gravitropism; GO:0090333,regulation of stomatal closure; GO:0080167,response to karrikin; GO:0009414,response to water deprivation; GO:0048364,root development
gene-LOC100192006	GO:0005829,cytosol; GO:0005634,nucleus; GO:0003729,mRNA binding; GO:0003743,translation initiation factor activity; GO:0000184,nuclear-transcribed mRNA catabolic process, nonsense-mediated decay; GO:1900151,regulation of nuclear-transcribed mRNA catabolic process, deadenylation-dependent decay; GO:0060211,regulation of nuclear-transcribed mRNA poly(A) tail shortening; GO:0006446,regulation of tra…
gene-LOC100192007	GO:0005634,nucleus; GO:0003700,DNA-binding transcription factor activity; GO:0043565,sequence-specific DNA binding; GO:0006952,defense response; GO:0006351,transcription, DNA-templated
gene-LOC100192009	GO:0016020,membrane; GO:0042626,ATPase activity, coupled to transmembrane movement of substances; GO:0006897,endocytosis
gene-LOC100192010	GO:0009507,chloroplast; GO:0009941,chloroplast envelope; GO:0009570,chloroplast stroma; GO:0005840,ribosome; GO:0009579,thylakoid; GO:0003729,mRNA binding; GO:0003735,structural constituent of ribosome; GO:0009735,response to cytokinin; GO:0006412,translation
gene-LOC100192011	GO:0016021,integral component of membrane; GO:0018685,alkane 1-monooxygenase activity; GO:0070330,aromatase activity; GO:0020037,heme binding; GO:0005506,iron ion binding; GO:0006631,fatty acid metabolic process
gene-LOC100192012	GO:0005737,cytoplasm; GO:0046872,metal ion binding; GO:0004748,ribonucleoside-diphosphate reductase activity, thioredoxin disulfide as acceptor; GO:0009263,deoxyribonucleotide biosynthetic process; GO:0006260,DNA replication
gene-LOC100192014	GO:0005576,extracellular region; GO:0050660,flavin adenine dinucleotide binding; GO:0046593,mandelonitrile lyase activity; GO:0016614,oxidoreductase activity, acting on CH-OH group of donors; GO:0007267,cell-cell signaling; GO:0009553,embryo sac development; GO:0010430,fatty acid omega-oxidation
gene-LOC100192016	GO:0005768,endosome; GO:0005794,Golgi apparatus; GO:0016021,integral component of membrane; GO:0005886,plasma membrane; GO:0005802,trans-Golgi network; GO:0048544,recognition of pollen
gene-LOC100192017	GO:0009507,chloroplast; GO:0009570,chloroplast stroma; GO:0008696,4-amino-4-deoxychorismate lyase activity; GO:0047810,D-alanine:2-oxoglutarate aminotransferase activity; GO:0008153,para-aminobenzoic acid biosynthetic process; GO:0046654,tetrahydrofolate biosynthetic process
gene-LOC100192019	GO:0004553,hydrolase activity, hydrolyzing O-glycosyl compounds; GO:0005975,carbohydrate metabolic process
gene-LOC100192020	GO:0003677,DNA binding; GO:0046872,metal ion binding; GO:0003723,RNA binding
gene-LOC100192021	GO:0003677,DNA binding
gene-LOC100192022	GO:0000784,nuclear chromosome, telomeric region; GO:0035312,5'-3' exodeoxyribonuclease activity; GO:0003684,damaged DNA binding; GO:0006281,DNA repair; GO:0006303,double-strand break repair via nonhomologous end joining; GO:0036297,interstrand cross-link repair; GO:0031848,protection from non-homologous end joining at telomere
gene-LOC100192024	GO:0005789,endoplasmic reticulum membrane; GO:0016021,integral component of membrane; GO:0015450,P-P-bond-hydrolysis-driven protein transmembrane transporter activity; GO:0006605,protein targeting
gene-LOC100192025	GO:0005737,cytoplasm; GO:0046872,metal ion binding; GO:0061630,ubiquitin protein ligase activity; GO:0043161,proteasome-mediated ubiquitin-dependent protein catabolic process; GO:0000209,protein polyubiquitination; GO:0016567,protein ubiquitination; GO:0042787,NA
gene-LOC100192026	GO:0005618,cell wall; GO:0005576,extracellular region; GO:0005765,lysosomal membrane; GO:0009505,plant-type cell wall; GO:0004566,beta-glucuronidase activity; GO:0009826,unidimensional cell growth
gene-LOC100192027	GO:0005768,endosome; GO:0005794,Golgi apparatus; GO:0000139,Golgi membrane; GO:0016021,integral component of membrane; GO:0005802,trans-Golgi network; GO:0047262,polygalacturonate 4-alpha-galacturonosyltransferase activity; GO:0071555,cell wall organization; GO:0045489,pectin biosynthetic process
gene-LOC100192028	GO:0005634,nucleus; GO:0003700,DNA-binding transcription factor activity; GO:0046872,metal ion binding; GO:0043565,sequence-specific DNA binding; GO:0006355,regulation of transcription, DNA-templated; GO:0006351,transcription, DNA-templated
gene-LOC100192029	GO:0031225,anchored component of membrane; GO:0046658,anchored component of plasma membrane; GO:0048046,apoplast; GO:0005618,cell wall; GO:0005886,plasma membrane; GO:0009506,plasmodesma; GO:0042973,glucan endo-1,3-beta-D-glucosidase activity; GO:0004553,hydrolase activity, hydrolyzing O-glycosyl compounds; GO:0030247,polysaccharide binding; GO:0005975,carbohydrate metabolic process; GO:0006952,d…
gene-LOC100192030	GO:0016021,integral component of membrane; GO:0005886,plasma membrane; GO:0022857,transmembrane transporter activity
gene-LOC100192032	GO:0030008,TRAPP complex; GO:0016192,vesicle-mediated transport
gene-LOC100192035	GO:0009534,chloroplast thylakoid; GO:0009535,chloroplast thylakoid membrane; GO:0043231,intracellular membrane-bounded organelle; GO:0004519,endonuclease activity; GO:0003729,mRNA binding; GO:0003723,RNA binding; GO:0009409,response to cold; GO:0009451,RNA modification
gene-LOC100192036	GO:0009507,chloroplast; GO:0016491,oxidoreductase activity
gene-LOC100192037	GO:0005794,Golgi apparatus; GO:0016021,integral component of membrane; GO:0006890,retrograde vesicle-mediated transport, Golgi to ER
gene-LOC100192038	GO:0030246,carbohydrate binding; GO:0047938,glucose-6-phosphate 1-epimerase activity; GO:0005975,carbohydrate metabolic process
gene-LOC100192039	GO:0046658,anchored component of plasma membrane; GO:0005618,cell wall; GO:0005737,cytoplasm; GO:0005576,extracellular region; GO:0005634,nucleus; GO:0042973,glucan endo-1,3-beta-D-glucosidase activity; GO:0004553,hydrolase activity, hydrolyzing O-glycosyl compounds; GO:0030247,polysaccharide binding; GO:0005975,carbohydrate metabolic process; GO:0071555,cell wall organization; GO:0006952,defense…
gene-LOC100192042	GO:0005840,ribosome; GO:0003743,translation initiation factor activity
gene-LOC100192043	GO:0005737,cytoplasm; GO:0004364,glutathione transferase activity; GO:0006749,glutathione metabolic process; GO:0009407,toxin catabolic process
gene-LOC100192044	GO:0016021,integral component of membrane; GO:0005773,vacuole; GO:0018685,alkane 1-monooxygenase activity; GO:0020037,heme binding; GO:0005506,iron ion binding; GO:0006631,fatty acid metabolic process; GO:0010345,suberin biosynthetic process
gene-LOC100192045	GO:0016021,integral component of membrane
gene-LOC100192046	GO:0005768,endosome; GO:0005794,Golgi apparatus; GO:0000139,Golgi membrane; GO:0016021,integral component of membrane; GO:0005802,trans-Golgi network; GO:0016757,transferase activity, transferring glycosyl groups; GO:0071555,cell wall organization; GO:0045489,pectin biosynthetic process; GO:0006486,protein glycosylation
gene-LOC100192048	GO:0003676,nucleic acid binding
gene-LOC100192049	GO:0009626,plant-type hypersensitive response
gene-LOC100192050	GO:0005737,cytoplasm; GO:0005634,nucleus; GO:0003677,DNA binding; GO:0003700,DNA-binding transcription factor activity; GO:0048825,cotyledon development; GO:0009736,cytokinin-activated signaling pathway; GO:0009873,ethylene-activated signaling pathway; GO:0048366,leaf development; GO:0006351,transcription, DNA-templated
gene-LOC100192051	GO:0016021,integral component of membrane; GO:0016020,membrane; GO:0000325,plant-type vacuole; GO:0005774,vacuolar membrane; GO:0005385,zinc ion transmembrane transporter activity; GO:0061088,regulation of sequestering of zinc ion; GO:0010043,response to zinc ion
gene-LOC100192052	GO:0005524,ATP binding; GO:0016740,transferase activity; GO:0016567,protein ubiquitination
gene-LOC100192054	GO:0016021,integral component of membrane; GO:0046872,metal ion binding; GO:0061630,ubiquitin protein ligase activity; GO:0043161,proteasome-mediated ubiquitin-dependent protein catabolic process
gene-LOC100192056	GO:0008289,lipid binding; GO:0006869,lipid transport
gene-LOC100192057	GO:0005737,cytoplasm; GO:0005634,nucleus; GO:0005667,transcription factor complex; GO:0003677,DNA binding; GO:0003700,DNA-binding transcription factor activity; GO:0046983,protein dimerization activity; GO:0007049,cell cycle; GO:0051446,positive regulation of meiotic cell cycle; GO:0045893,positive regulation of transcription, DNA-templated; GO:0006351,transcription, DNA-templated
gene-LOC100192058	GO:0046872,metal ion binding; GO:0004842,ubiquitin-protein transferase activity; GO:0090378,seed trichome elongation
gene-LOC100192059	GO:0016787,hydrolase activity
gene-LOC100192060	GO:0009507,chloroplast; GO:0009941,chloroplast envelope; GO:0009570,chloroplast stroma; GO:0009536,plastid; GO:0004048,anthranilate phosphoribosyltransferase activity; GO:0000162,tryptophan biosynthetic process
gene-LOC100192061	GO:0009507,chloroplast; GO:0009941,chloroplast envelope; GO:0031969,chloroplast membrane; GO:0016021,integral component of membrane; GO:0009536,plastid; GO:0008194,UDP-glycosyltransferase activity; GO:0016036,cellular response to phosphate starvation; GO:0009247,glycolipid biosynthetic process; GO:0046506,sulfolipid biosynthetic process
gene-LOC100192062	GO:0005634,nucleus; GO:0003677,DNA binding; GO:0006355,regulation of transcription, DNA-templated; GO:0006351,transcription, DNA-templated
gene-LOC100192064	GO:0009507,chloroplast; GO:0009570,chloroplast stroma; GO:0005739,mitochondrion; GO:0005524,ATP binding; GO:0046872,metal ion binding; GO:0004642,phosphoribosylformylglycinamidine synthase activity; GO:0006189,'de novo' IMP biosynthetic process; GO:0006541,glutamine metabolic process; GO:0055046,microgametogenesis; GO:0009555,pollen development
gene-LOC100192065	GO:0033178,proton-transporting two-sector ATPase complex, catalytic domain; GO:0046961,proton-transporting ATPase activity, rotational mechanism; GO:0015991,ATP hydrolysis coupled proton transport
gene-LOC100192067	GO:0005829,cytosol; GO:0005634,nucleus; GO:0005681,spliceosomal complex; GO:0003729,mRNA binding; GO:0006397,mRNA processing; GO:0051028,mRNA transport; GO:1901000,regulation of response to salt stress; GO:2000070,regulation of response to water deprivation; GO:0008380,RNA splicing; GO:0010228,vegetative to reproductive phase transition of meristem
gene-LOC100192068	GO:0005794,Golgi apparatus; GO:0005525,GTP binding; GO:0015031,protein transport; GO:0007264,small GTPase mediated signal transduction; GO:0016192,vesicle-mediated transport
gene-LOC100192069	GO:0005634,nucleus; GO:0003700,DNA-binding transcription factor activity; GO:0043565,sequence-specific DNA binding; GO:0006952,defense response; GO:0010150,leaf senescence; GO:0010200,response to chitin; GO:0006351,transcription, DNA-templated
gene-LOC100192071	GO:0005789,endoplasmic reticulum membrane; GO:0016021,integral component of membrane; GO:0046872,metal ion binding; GO:0004842,ubiquitin-protein transferase activity; GO:0043161,proteasome-mediated ubiquitin-dependent protein catabolic process; GO:0016567,protein ubiquitination; GO:0009409,response to cold; GO:0009723,response to ethylene; GO:0006970,response to osmotic stress; GO:0009414,respons…
gene-LOC100192072	GO:0031225,anchored component of membrane; GO:0005886,plasma membrane; GO:0009834,plant-type secondary cell wall biogenesis
gene-LOC100192073	GO:0046872,metal ion binding; GO:0004722,protein serine/threonine phosphatase activity
gene-LOC100192074	GO:0005634,nucleus; GO:0042393,histone binding; GO:0046872,metal ion binding; GO:0016569,covalent chromatin modification; GO:0006355,regulation of transcription, DNA-templated; GO:0006351,transcription, DNA-templated
gene-LOC100192075	GO:0005829,cytosol; GO:0005524,ATP binding; GO:0008865,fructokinase activity; GO:0004340,glucokinase activity; GO:0005536,glucose binding; GO:0019158,mannokinase activity; GO:0001678,cellular glucose homeostasis; GO:0006096,glycolytic process
gene-LOC100192076	GO:0022626,cytosolic ribosome; GO:0043231,intracellular membrane-bounded organelle; GO:0004519,endonuclease activity; GO:0003723,RNA binding; GO:0009451,RNA modification
gene-LOC100192077	GO:0016021,integral component of membrane; GO:0005886,plasma membrane; GO:0046872,metal ion binding; GO:0061630,ubiquitin protein ligase activity; GO:0070417,cellular response to cold; GO:0006952,defense response; GO:0043161,proteasome-mediated ubiquitin-dependent protein catabolic process; GO:0009909,regulation of flower development; GO:0010966,regulation of phosphate transport; GO:0010200,respo…
gene-LOC100192079	GO:0005618,cell wall; GO:0005576,extracellular region; GO:0016788,hydrolase activity, acting on ester bonds; GO:0016042,lipid catabolic process
gene-LOC100192080	GO:0005783,endoplasmic reticulum; GO:0005576,extracellular region; GO:0009505,plant-type cell wall; GO:0009506,plasmodesma; GO:0020037,heme binding; GO:0046872,metal ion binding; GO:0004601,peroxidase activity; GO:0042744,hydrogen peroxide catabolic process; GO:0042538,hyperosmotic salinity response; GO:0009664,plant-type cell wall organization; GO:0009409,response to cold; GO:0009269,response to…
gene-LOC100192081	GO:0016021,integral component of membrane
gene-LOC100192083	GO:0016021,integral component of membrane
gene-LOC100192084	GO:0000785,chromatin; GO:0005737,cytoplasm; GO:0005634,nucleus; GO:0032116,SMC loading complex; GO:0003690,double-stranded DNA binding; GO:0051301,cell division; GO:0009793,embryo development ending in seed dormancy; GO:0034088,maintenance of mitotic sister chromatid cohesion
gene-LOC100192085	GO:0009506,plasmodesma
gene-LOC100192086	GO:0052689,carboxylic ester hydrolase activity; GO:0016787,hydrolase activity
gene-LOC100192088	GO:0005783,endoplasmic reticulum; GO:0005794,Golgi apparatus; GO:0030176,integral component of endoplasmic reticulum membrane; GO:0016020,membrane; GO:0005886,plasma membrane; GO:0005774,vacuolar membrane; GO:0005096,GTPase activator activity; GO:0051020,GTPase binding; GO:0005090,Sar guanyl-nucleotide exchange factor activity; GO:0006888,ER to Golgi vesicle-mediated transport; GO:0009306,protein…
gene-LOC100192089	GO:0005783,endoplasmic reticulum; GO:0005634,nucleus; GO:0016740,transferase activity; GO:0008270,zinc ion binding; GO:0016567,protein ubiquitination; GO:1902456,regulation of stomatal opening
gene-LOC100192090	GO:0005576,extracellular region
gene-LOC100192091	GO:0003677,DNA binding; GO:0046872,metal ion binding
gene-LOC100192093	GO:0016021,integral component of membrane; GO:0000741,karyogamy; GO:0010197,polar nucleus fusion; GO:0009651,response to salt stress
gene-LOC100192094	GO:0009507,chloroplast; GO:0052740,1-acyl-2-lysophosphatidylserine acylhydrolase activity; GO:0008970,phospholipase A1 activity; GO:0052739,phosphatidylserine 1-acylhydrolase activity; GO:0016042,lipid catabolic process
gene-LOC100192097	GO:0005737,cytoplasm; GO:0005874,microtubule; GO:0008017,microtubule binding; GO:0071369,cellular response to ethylene stimulus
gene-LOC100192098	GO:0009507,chloroplast; GO:0005794,Golgi apparatus; GO:0000139,Golgi membrane; GO:0016021,integral component of membrane; GO:0030246,carbohydrate binding; GO:1990714,hydroxyproline O-galactosyltransferase activity; GO:0010405,arabinogalactan protein metabolic process; GO:0048354,mucilage biosynthetic process involved in seed coat development; GO:1900056,negative regulation of leaf senescence; GO:…
gene-LOC100192099	GO:0009507,chloroplast; GO:0005737,cytoplasm; GO:0003723,RNA binding; GO:0006417,regulation of translation
gene-LOC100192101	GO:0016021,integral component of membrane; GO:0005886,plasma membrane; GO:0022857,transmembrane transporter activity
gene-LOC100192102	GO:0047918,GDP-mannose 3,5-epimerase activity; GO:0051287,NAD binding; GO:0019853,L-ascorbic acid biosynthetic process
gene-LOC100192103	GO:0005768,endosome; GO:0005794,Golgi apparatus; GO:0000139,Golgi membrane; GO:0016021,integral component of membrane; GO:0005802,trans-Golgi network; GO:0017095,heparan sulfate 6-O-sulfotransferase activity; GO:0008476,protein-tyrosine sulfotransferase activity; GO:0055070,copper ion homeostasis; GO:0015015,heparan sulfate proteoglycan biosynthetic process, enzymatic modification; GO:0045087,inn…
gene-LOC100192104	GO:0016021,integral component of membrane; GO:0005743,mitochondrial inner membrane; GO:0022857,transmembrane transporter activity; GO:0006839,mitochondrial transport
gene-LOC100192105	GO:0005576,extracellular region; GO:0020037,heme binding; GO:0046872,metal ion binding; GO:0004601,peroxidase activity; GO:0042744,hydrogen peroxide catabolic process; GO:0006979,response to oxidative stress
gene-LOC100192106	GO:0009507,chloroplast; GO:0016020,membrane; GO:0008289,lipid binding; GO:0007049,cell cycle; GO:0051301,cell division
gene-LOC100192107	GO:0005623,cell; GO:0016021,integral component of membrane; GO:0045454,cell redox homeostasis
gene-LOC100192108	GO:0005737,cytoplasm; GO:0005634,nucleus; GO:0005524,ATP binding; GO:0004674,protein serine/threonine kinase activity; GO:0035556,intracellular signal transduction; GO:0006468,protein phosphorylation
gene-LOC100192109	GO:0016021,integral component of membrane; GO:0009705,plant-type vacuole membrane; GO:0015369,calcium:proton antiporter activity
gene-LOC100192110	GO:0033897,ribonuclease T2 activity; GO:0003723,RNA binding
gene-LOC100192111	GO:0016021,integral component of membrane
gene-LOC100192112	GO:0000139,Golgi membrane; GO:0016021,integral component of membrane; GO:0047259,glucomannan 4-beta-mannosyltransferase activity; GO:0051753,mannan synthase activity; GO:0071555,cell wall organization; GO:0010192,mucilage biosynthetic process; GO:0048359,mucilage metabolic process involved in seed coat development
gene-LOC100192113	GO:0009881,photoreceptor activity; GO:0018298,protein-chromophore linkage
gene-LOC100192114	GO:0047213,anthocyanidin 3-O-glucosyltransferase activity; GO:0009718,anthocyanin-containing compound biosynthetic process
gene-LOC100192115	GO:0009507,chloroplast; GO:0016021,integral component of membrane; GO:0010196,nonphotochemical quenching
gene-LOC100192117	GO:0005737,cytoplasm; GO:0006952,defense response; GO:0009607,response to biotic stimulus
gene-LOC100192349	GO:0004066,asparagine synthase (glutamine-hydrolyzing) activity; GO:0005524,ATP binding; GO:0006541,glutamine metabolic process; GO:0070981,L-asparagine biosynthetic process
gene-LOC100192350	GO:0004066,asparagine synthase (glutamine-hydrolyzing) activity; GO:0005524,ATP binding; GO:0042803,protein homodimerization activity; GO:0006529,asparagine biosynthetic process; GO:0006541,glutamine metabolic process; GO:0070981,L-asparagine biosynthetic process; GO:0009646,response to absence of light
gene-LOC100192351	GO:0004066,asparagine synthase (glutamine-hydrolyzing) activity; GO:0005524,ATP binding; GO:0042803,protein homodimerization activity; GO:0006529,asparagine biosynthetic process; GO:0006541,glutamine metabolic process; GO:0070981,L-asparagine biosynthetic process; GO:0009646,response to absence of light
gene-LOC100192364	GO:0046872,metal ion binding; GO:0004722,protein serine/threonine phosphatase activity
gene-LOC100192365	GO:0005576,extracellular region; GO:0016021,integral component of membrane; GO:0005886,plasma membrane; GO:0005524,ATP binding; GO:0004675,transmembrane receptor protein serine/threonine kinase activity; GO:0007165,signal transduction
gene-LOC100192366	GO:0016021,integral component of membrane; GO:0005524,ATP binding; GO:0004674,protein serine/threonine kinase activity
gene-LOC100192457	GO:0005634,nucleus; GO:0003677,DNA binding; GO:0003700,DNA-binding transcription factor activity; GO:0009873,ethylene-activated signaling pathway; GO:0006351,transcription, DNA-templated
gene-LOC100192459	GO:0005768,endosome; GO:0005794,Golgi apparatus; GO:0000139,Golgi membrane; GO:0016021,integral component of membrane; GO:0005802,trans-Golgi network; GO:0016757,transferase activity, transferring glycosyl groups; GO:0071555,cell wall organization; GO:0045489,pectin biosynthetic process; GO:0006486,protein glycosylation
gene-LOC100192460	GO:0005794,Golgi apparatus; GO:0000139,Golgi membrane; GO:0016021,integral component of membrane; GO:0008378,galactosyltransferase activity; GO:0006486,protein glycosylation
gene-LOC100192461	GO:0005829,cytosol; GO:0016020,membrane; GO:0005886,plasma membrane; GO:0009506,plasmodesma; GO:0004372,glycine hydroxymethyltransferase activity; GO:0030170,pyridoxal phosphate binding; GO:0007623,circadian rhythm; GO:0019264,glycine biosynthetic process from serine; GO:0046686,response to cadmium ion; GO:0035999,tetrahydrofolate interconversion
gene-LOC100192462	GO:0048046,apoplast; GO:0009505,plant-type cell wall; GO:0004190,aspartic-type endopeptidase activity; GO:0030163,protein catabolic process; GO:0006508,proteolysis; GO:0043067,regulation of programmed cell death; GO:0009627,systemic acquired resistance
gene-LOC100192464	GO:0005794,Golgi apparatus; GO:0016021,integral component of membrane; GO:0016413,O-acetyltransferase activity; GO:0071554,cell wall organization or biogenesis
gene-LOC100192466	GO:0005885,Arp2/3 protein complex; GO:0005829,cytosol; GO:0003779,actin binding; GO:0005524,ATP binding; GO:0007015,actin filament organization; GO:0034314,Arp2/3 complex-mediated actin nucleation; GO:0000902,cell morphogenesis; GO:0007275,multicellular organism development; GO:0009825,multidimensional cell growth; GO:0010090,trichome morphogenesis
gene-LOC100192467	GO:0007568,aging; GO:0010150,leaf senescence; GO:0009620,response to fungus; GO:0002238,response to molecule of fungal origin; GO:0009624,response to nematode; GO:0010193,response to ozone
gene-LOC100192468	GO:0016021,integral component of membrane; GO:0005743,mitochondrial inner membrane; GO:0005739,mitochondrion; GO:0070469,respiratory chain; GO:0051537,2 iron, 2 sulfur cluster binding; GO:0046872,metal ion binding; GO:0008121,ubiquinol-cytochrome-c reductase activity; GO:0009060,aerobic respiration; GO:0009408,response to heat
gene-LOC100192469	GO:0016021,integral component of membrane; GO:0005886,plasma membrane; GO:0009506,plasmodesma; GO:0042936,NA; GO:0022857,transmembrane transporter activity; GO:0042937,tripeptide transmembrane transporter activity; GO:0042938,dipeptide transport; GO:0006807,nitrogen compound metabolic process; GO:0015031,protein transport; GO:0042939,tripeptide transport
gene-LOC100192472	GO:0005794,Golgi apparatus; GO:0005525,GTP binding; GO:0015031,protein transport; GO:0007264,small GTPase mediated signal transduction; GO:0016192,vesicle-mediated transport
gene-LOC100192473	GO:0005829,cytosol; GO:0005524,ATP binding; GO:0046872,metal ion binding; GO:0004674,protein serine/threonine kinase activity; GO:0032147,activation of protein kinase activity; GO:0007346,regulation of mitotic cell cycle; GO:1902456,regulation of stomatal opening; GO:0023014,signal transduction by protein phosphorylation; GO:0031098,stress-activated protein kinase signaling cascade
gene-LOC100192474	GO:0009507,chloroplast; GO:0006397,mRNA processing
gene-LOC100192475	GO:0016021,integral component of membrane; GO:0005743,mitochondrial inner membrane; GO:0005744,TIM23 mitochondrial import inner membrane translocase complex; GO:0005739,mitochondrion; GO:0004721,phosphoprotein phosphatase activity; GO:0030150,protein import into mitochondrial matrix
gene-LOC100192477	GO:0005783,endoplasmic reticulum; GO:0005789,endoplasmic reticulum membrane; GO:0016021,integral component of membrane; GO:0052917,dol-P-Man:Man(7)GlcNAc(2)-PP-Dol alpha-1,6-mannosyltransferase activity; GO:0006487,protein N-linked glycosylation; GO:0030433,ubiquitin-dependent ERAD pathway
gene-LOC100192478	GO:0005829,cytosol; GO:0003872,6-phosphofructokinase activity; GO:0005524,ATP binding; GO:0046872,metal ion binding; GO:0006002,fructose 6-phosphate metabolic process; GO:0006096,glycolytic process; GO:0010053,root epidermal cell differentiation
gene-LOC100192479	GO:0005634,nucleus; GO:0003886,DNA (cytosine-5-)-methyltransferase activity; GO:0003677,DNA binding
gene-LOC100192480	GO:0005768,endosome; GO:0010008,endosome membrane; GO:0032580,Golgi cisterna membrane; GO:0016021,integral component of membrane; GO:0005886,plasma membrane; GO:0015386,potassium:proton antiporter activity; GO:0015385,sodium:proton antiporter activity; GO:0071805,potassium ion transmembrane transport; GO:0051453,regulation of intracellular pH; GO:0098719,sodium ion import across plasma membrane
gene-LOC100192481	GO:0005634,nucleus; GO:0003700,DNA-binding transcription factor activity; GO:0044212,transcription regulatory region DNA binding; GO:0006351,transcription, DNA-templated
gene-LOC100192482	GO:0005576,extracellular region; GO:0020037,heme binding; GO:0046872,metal ion binding; GO:0004601,peroxidase activity; GO:0042744,hydrogen peroxide catabolic process; GO:0006979,response to oxidative stress; GO:0009651,response to salt stress
gene-LOC100192483	GO:0016021,integral component of membrane; GO:0005774,vacuolar membrane; GO:0022857,transmembrane transporter activity
gene-LOC100192484	GO:0005737,cytoplasm; GO:0005847,mRNA cleavage and polyadenylation specificity factor complex; GO:0005634,nucleus; GO:0005516,calmodulin binding; GO:0003677,DNA binding; GO:0004519,endonuclease activity; GO:0004521,endoribonuclease activity; GO:0046872,metal ion binding; GO:0003729,mRNA binding; GO:0003723,RNA binding; GO:0031124,mRNA 3'-end processing; GO:0006378,mRNA polyadenylation; GO:0009626…
gene-LOC100192485	GO:0005829,cytosol; GO:0004334,fumarylacetoacetase activity; GO:0046872,metal ion binding; GO:0008219,cell death; GO:1902000,homogentisate catabolic process; GO:0006559,L-phenylalanine catabolic process; GO:0006572,tyrosine catabolic process
gene-LOC100192486	GO:0043231,intracellular membrane-bounded organelle; GO:0004519,endonuclease activity; GO:0003723,RNA binding; GO:0008270,zinc ion binding; GO:0009451,RNA modification
gene-LOC100192487	GO:0016021,integral component of membrane; GO:0102966,arachidoyl-CoA:1-dodecanol O-acyltransferase activity; GO:0047196,long-chain-alcohol O-fatty-acyltransferase activity; GO:0103095,wax ester synthase activity; GO:0006629,lipid metabolic process
gene-LOC100192488	GO:0005634,nucleus; GO:0006397,mRNA processing
gene-LOC100192489	GO:0005737,cytoplasm; GO:0005634,nucleus; GO:0005524,ATP binding; GO:0004693,cyclin-dependent protein serine/threonine kinase activity; GO:0004674,protein serine/threonine kinase activity; GO:0008353,RNA polymerase II CTD heptapeptide repeat kinase activity; GO:0035556,intracellular signal transduction; GO:0010468,regulation of gene expression
gene-LOC100192490	GO:0016020,membrane; GO:0008375,acetylglucosaminyltransferase activity
gene-LOC100192491	GO:0016021,integral component of membrane
gene-LOC100192492	GO:0005737,cytoplasm; GO:0005634,nucleus; GO:0009506,plasmodesma; GO:0005524,ATP binding; GO:0004674,protein serine/threonine kinase activity; GO:0006897,endocytosis; GO:0018105,peptidyl-serine phosphorylation; GO:0008360,regulation of cell shape
gene-LOC100192493	GO:0046872,metal ion binding; GO:0006952,defense response; GO:1900150,regulation of defense response to fungus; GO:0009623,response to parasitic fungus
gene-LOC100192494	GO:0000439,transcription factor TFIIH core complex; GO:0005675,transcription factor TFIIH holo complex; GO:0003684,damaged DNA binding; GO:0046872,metal ion binding; GO:0008135,translation factor activity, RNA binding; GO:0006289,nucleotide-excision repair; GO:0070816,phosphorylation of RNA polymerase II C-terminal domain; GO:0006351,transcription, DNA-templated
gene-LOC100192495	GO:0005634,nucleus; GO:0003677,DNA binding; GO:0009299,mRNA transcription; GO:0007275,multicellular organism development; GO:0090698,post-embryonic plant morphogenesis; GO:0006355,regulation of transcription, DNA-templated; GO:0009416,response to light stimulus
gene-LOC100192496	GO:0005524,ATP binding; GO:0004674,protein serine/threonine kinase activity; GO:0009742,brassinosteroid mediated signaling pathway
gene-LOC100192497	GO:0005524,ATP binding; GO:0004674,protein serine/threonine kinase activity; GO:0009738,abscisic acid-activated signaling pathway
gene-LOC100192498	GO:0005768,endosome; GO:0005794,Golgi apparatus; GO:0016021,integral component of membrane; GO:0005802,trans-Golgi network; GO:0008643,carbohydrate transport
gene-LOC100192499	GO:0016021,integral component of membrane; GO:0005743,mitochondrial inner membrane; GO:0005739,mitochondrion; GO:0016627,oxidoreductase activity, acting on the CH-CH group of donors; GO:0006784,heme a biosynthetic process
gene-LOC100192501	GO:0009507,chloroplast; GO:0009514,glyoxysome; GO:0016020,membrane; GO:0005739,mitochondrion; GO:0005730,nucleolus; GO:0005777,peroxisome; GO:0005774,vacuolar membrane; GO:0003988,acetyl-CoA C-acyltransferase activity; GO:0006635,fatty acid beta-oxidation; GO:0010111,glyoxysome organization; GO:0009695,jasmonic acid biosynthetic process; GO:0031408,oxylipin biosynthetic process; GO:0009789,positi…
gene-LOC100192503	GO:0030176,integral component of endoplasmic reticulum membrane; GO:0005773,vacuole; GO:0046872,metal ion binding; GO:0004222,metalloendopeptidase activity; GO:0071586,CAAX-box protein processing
gene-LOC100192505	GO:0005840,ribosome; GO:0003735,structural constituent of ribosome; GO:0006412,translation
gene-LOC100192506	GO:0005783,endoplasmic reticulum; GO:0016021,integral component of membrane; GO:0005385,zinc ion transmembrane transporter activity; GO:0006882,cellular zinc ion homeostasis; GO:0071577,zinc ion transmembrane transport
gene-LOC100192507	GO:0009706,chloroplast inner membrane; GO:0005516,calmodulin binding; GO:0016491,oxidoreductase activity; GO:0015031,protein transport
gene-LOC100192510	GO:0006396,RNA processing
gene-LOC100192511	GO:0000139,Golgi membrane; GO:0016021,integral component of membrane; GO:0031201,SNARE complex; GO:0005484,SNAP receptor activity; GO:0000149,SNARE binding; GO:0006888,ER to Golgi vesicle-mediated transport; GO:0006886,intracellular protein transport; GO:0048278,vesicle docking; GO:0006906,vesicle fusion
gene-LOC100192513	GO:0016021,integral component of membrane
gene-LOC100192514	GO:0045543,gibberellin 2-beta-dioxygenase activity; GO:0046872,metal ion binding; GO:0009686,gibberellin biosynthetic process
gene-LOC100192515	GO:0016783,sulfurtransferase activity; GO:0008033,tRNA processing
gene-LOC100192516	GO:0022625,cytosolic large ribosomal subunit; GO:0003723,RNA binding; GO:0003735,structural constituent of ribosome; GO:0000027,ribosomal large subunit assembly; GO:0006412,translation
gene-LOC100192519	GO:0005783,endoplasmic reticulum; GO:0090439,tetraketide alpha-pyrone synthase activity; GO:0009813,flavonoid biosynthetic process; GO:0010584,pollen exine formation; GO:0030639,polyketide biosynthetic process; GO:0080110,sporopollenin biosynthetic process
gene-LOC100192520	GO:0034595,phosphatidylinositol phosphate 5-phosphatase activity; GO:0034485,phosphatidylinositol-3,4,5-trisphosphate 5-phosphatase activity; GO:0004439,phosphatidylinositol-4,5-bisphosphate 5-phosphatase activity; GO:0071472,cellular response to salt stress; GO:0046856,phosphatidylinositol dephosphorylation; GO:2000369,regulation of clathrin-dependent endocytosis; GO:2000377,regulation of reacti…
gene-LOC100192522	GO:0008061,chitin binding; GO:0004568,chitinase activity; GO:0006032,chitin catabolic process; GO:0000272,polysaccharide catabolic process
gene-LOC100192523	GO:0016567,protein ubiquitination
gene-LOC100192524	GO:0005789,endoplasmic reticulum membrane; GO:0016021,integral component of membrane; GO:0005778,peroxisomal membrane; GO:0005777,peroxisome; GO:0006633,fatty acid biosynthetic process; GO:0007031,peroxisome organization
gene-LOC100192526	GO:0005786,signal recognition particle, endoplasmic reticulum targeting; GO:0008312,7S RNA binding; GO:0030942,endoplasmic reticulum signal peptide binding; GO:0005047,signal recognition particle binding; GO:0006614,SRP-dependent cotranslational protein targeting to membrane
gene-LOC100192529	GO:0008168,methyltransferase activity
gene-LOC100192531	GO:0005634,nucleus; GO:0048188,Set1C/COMPASS complex; GO:0031490,chromatin DNA binding; GO:0044212,transcription regulatory region DNA binding; GO:0009793,embryo development ending in seed dormancy; GO:0080182,histone H3-K4 trimethylation; GO:0060776,simple leaf morphogenesis; GO:0006351,transcription, DNA-templated; GO:0010228,vegetative to reproductive phase transition of meristem
gene-LOC100192532	GO:0005768,endosome; GO:0005794,Golgi apparatus; GO:0016021,integral component of membrane; GO:0005802,trans-Golgi network; GO:0016757,transferase activity, transferring glycosyl groups; GO:0006004,fucose metabolic process; GO:0006486,protein glycosylation
gene-LOC100192533	GO:0009507,chloroplast; GO:0005739,mitochondrion; GO:0009536,plastid; GO:0004527,exonuclease activity; GO:0046872,metal ion binding; GO:0003676,nucleic acid binding; GO:0000738,DNA catabolic process, exonucleolytic
gene-LOC100192534	GO:0046658,anchored component of plasma membrane; GO:0005618,cell wall; GO:0005737,cytoplasm; GO:0005576,extracellular region; GO:0005634,nucleus; GO:0042973,glucan endo-1,3-beta-D-glucosidase activity; GO:0004553,hydrolase activity, hydrolyzing O-glycosyl compounds; GO:0030247,polysaccharide binding; GO:0005975,carbohydrate metabolic process; GO:0071555,cell wall organization; GO:0006952,defense…
gene-LOC100192535	GO:0046872,metal ion binding; GO:0004722,protein serine/threonine phosphatase activity
gene-LOC100192536	GO:0005768,endosome; GO:0005794,Golgi apparatus; GO:0016021,integral component of membrane; GO:0031201,SNARE complex; GO:0005802,trans-Golgi network; GO:0005484,SNAP receptor activity; GO:0000149,SNARE binding; GO:0007030,Golgi organization; GO:0006886,intracellular protein transport; GO:0009306,protein secretion; GO:0007034,vacuolar transport; GO:0048278,vesicle docking; GO:0006906,vesicle fusion
gene-LOC100192537	GO:0016021,integral component of membrane; GO:0005886,plasma membrane
gene-LOC100192538	GO:0016021,integral component of membrane; GO:0005743,mitochondrial inner membrane; GO:0005739,mitochondrion; GO:0070469,respiratory chain; GO:0051537,2 iron, 2 sulfur cluster binding; GO:0046872,metal ion binding; GO:0008121,ubiquinol-cytochrome-c reductase activity; GO:0009060,aerobic respiration; GO:0009408,response to heat
gene-LOC100192539	GO:0031969,chloroplast membrane; GO:0016021,integral component of membrane; GO:0004222,metalloendopeptidase activity; GO:0009658,chloroplast organization; GO:0009959,negative gravitropism; GO:0048564,photosystem I assembly; GO:0010207,photosystem II assembly; GO:0060359,response to ammonium ion; GO:0043157,response to cation stress; GO:0009723,response to ethylene; GO:0009416,response to light st…
gene-LOC100192540	GO:0005737,cytoplasm; GO:0005730,nucleolus; GO:0005634,nucleus; GO:0005886,plasma membrane; GO:0005524,ATP binding; GO:0016301,kinase activity; GO:0004672,protein kinase activity; GO:0004674,protein serine/threonine kinase activity; GO:0009734,auxin-activated signaling pathway; GO:0010540,basipetal auxin transport; GO:0035556,intracellular signal transduction; GO:0006468,protein phosphorylation
gene-LOC100192541	GO:0000139,Golgi membrane; GO:0016021,integral component of membrane; GO:0008378,galactosyltransferase activity; GO:0009793,embryo development ending in seed dormancy; GO:0006486,protein glycosylation
gene-LOC100192542	GO:0016021,integral component of membrane
gene-LOC100192543	GO:0005768,endosome; GO:0005794,Golgi apparatus; GO:0000139,Golgi membrane; GO:0016021,integral component of membrane; GO:0005802,trans-Golgi network; GO:0008168,methyltransferase activity; GO:0045492,xylan biosynthetic process
gene-LOC100192544	GO:0005634,nucleus; GO:0048188,Set1C/COMPASS complex; GO:0042393,histone binding; GO:0008168,methyltransferase activity; GO:0010228,vegetative to reproductive phase transition of meristem
gene-LOC100192546	GO:0009507,chloroplast; GO:0009941,chloroplast envelope; GO:0009535,chloroplast thylakoid membrane; GO:0010598,NAD(P)H dehydrogenase complex (plastoquinone); GO:0016655,oxidoreductase activity, acting on NAD(P)H, quinone or similar compound as acceptor; GO:0048038,quinone binding; GO:0009817,defense response to fungus, incompatible interaction; GO:0010258,NADH dehydrogenase complex (plastoquinone…
gene-LOC100192547	GO:0005789,endoplasmic reticulum membrane; GO:0016021,integral component of membrane; GO:0016020,membrane; GO:0005886,plasma membrane; GO:0005506,iron ion binding; GO:0016491,oxidoreductase activity; GO:0043447,alkane biosynthetic process; GO:0042335,cuticle development; GO:0006723,cuticle hydrocarbon biosynthetic process; GO:0008610,lipid biosynthetic process; GO:0006629,lipid metabolic process;…
gene-LOC100192548	GO:0005634,nucleus; GO:0050832,defense response to fungus
gene-LOC100192550	GO:0005840,ribosome; GO:0003735,structural constituent of ribosome; GO:0006412,translation
gene-LOC100192551	GO:0005829,cytosol; GO:0034709,methylosome; GO:0005634,nucleus; GO:0034715,pICln-Sm protein complex; GO:0005886,plasma membrane; GO:0006884,cell volume homeostasis; GO:0006821,chloride transport; GO:0000387,spliceosomal snRNP assembly
gene-LOC100192554	GO:0003677,DNA binding; GO:0046872,metal ion binding
gene-LOC100192556	GO:0047037,salutaridine reductase (NADPH) activity; GO:0009820,alkaloid metabolic process
gene-LOC100192557	GO:0005634,nucleus; GO:0003677,DNA binding; GO:0008289,lipid binding; GO:0006355,regulation of transcription, DNA-templated; GO:0006351,transcription, DNA-templated
gene-LOC100192558	GO:0005789,endoplasmic reticulum membrane; GO:0010008,endosome membrane; GO:0016021,integral component of membrane; GO:0005886,plasma membrane; GO:0008289,lipid binding; GO:0006952,defense response
gene-LOC100192559	GO:0005737,cytoplasm; GO:0052689,carboxylic ester hydrolase activity; GO:0008474,palmitoyl-(protein) hydrolase activity; GO:0006631,fatty acid metabolic process; GO:0002084,protein depalmitoylation
gene-LOC100192560	GO:0003677,DNA binding; GO:0046872,metal ion binding; GO:0003723,RNA binding
gene-LOC100192562	GO:0005634,nucleus; GO:0003682,chromatin binding; GO:0003677,DNA binding
gene-LOC100192564	GO:0005524,ATP binding; GO:0017050,D-erythro-sphingosine kinase activity; GO:0003951,NAD+ kinase activity; GO:0030148,sphingolipid biosynthetic process
gene-LOC100192568	GO:0031969,chloroplast membrane; GO:0016021,integral component of membrane; GO:0102551,homogentisate geranylgeranyl transferase activity; GO:0010176,homogentisate phytyltransferase activity; GO:0071555,cell wall organization; GO:0009915,phloem sucrose loading; GO:0031347,regulation of defense response; GO:0009266,response to temperature stimulus; GO:0006636,unsaturated fatty acid biosynthetic pro…
gene-LOC100192570	GO:0005783,endoplasmic reticulum; GO:0005789,endoplasmic reticulum membrane; GO:0005794,Golgi apparatus; GO:0000139,Golgi membrane; GO:0016021,integral component of membrane; GO:0015297,antiporter activity; GO:0005464,UDP-xylose transmembrane transporter activity; GO:0008643,carbohydrate transport; GO:0015790,UDP-xylose transmembrane transport
gene-LOC100192572	GO:0009642,response to light intensity
gene-LOC100192575	GO:0051213,dioxygenase activity; GO:0046872,metal ion binding; GO:0009267,cellular response to starvation
gene-LOC100192577	GO:0005634,nucleus; GO:0001046,core promoter sequence-specific DNA binding; GO:0003700,DNA-binding transcription factor activity; GO:0046983,protein dimerization activity; GO:0001228,DNA-binding transcription activator activity, RNA polymerase II-specific; GO:0006355,regulation of transcription, DNA-templated; GO:0080147,root hair cell development; GO:0006366,transcription by RNA polymerase II
gene-LOC100192578	GO:0005634,nucleus; GO:0003677,DNA binding; GO:0007275,multicellular organism development; GO:0006355,regulation of transcription, DNA-templated; GO:0006351,transcription, DNA-templated
gene-LOC100192579	GO:0009507,chloroplast; GO:0009570,chloroplast stroma; GO:0009349,riboflavin synthase complex; GO:0000906,6,7-dimethyl-8-ribityllumazine synthase activity; GO:0016740,transferase activity; GO:0009231,riboflavin biosynthetic process
gene-LOC100192580	GO:0005634,nucleus; GO:0003723,RNA binding; GO:0006397,mRNA processing
gene-LOC100192581	GO:0016021,integral component of membrane
gene-LOC100192583	GO:0005739,mitochondrion; GO:0070469,respiratory chain; GO:0051539,4 iron, 4 sulfur cluster binding; GO:0046872,metal ion binding; GO:0008137,NADH dehydrogenase (ubiquinone) activity; GO:0048038,quinone binding
gene-LOC100192584	GO:0005886,plasma membrane; GO:0009506,plasmodesma; GO:0005524,ATP binding; GO:0004675,transmembrane receptor protein serine/threonine kinase activity; GO:0009742,brassinosteroid mediated signaling pathway; GO:0007166,cell surface receptor signaling pathway; GO:0006468,protein phosphorylation; GO:0009737,response to abscisic acid; GO:0009409,response to cold; GO:0009651,response to salt stress
gene-LOC100192585	GO:0005524,ATP binding; GO:0016740,transferase activity; GO:0016567,protein ubiquitination
gene-LOC100192586	GO:0045551,cinnamyl-alcohol dehydrogenase activity; GO:0052747,sinapyl alcohol dehydrogenase activity; GO:0008270,zinc ion binding; GO:0009809,lignin biosynthetic process
gene-LOC100192587	GO:0016021,integral component of membrane
gene-LOC100192588	GO:0009507,chloroplast; GO:0005829,cytosol; GO:0005634,nucleus; GO:0003729,mRNA binding; GO:0003723,RNA binding; GO:0008283,cell proliferation; GO:0035196,production of miRNAs involved in gene silencing by miRNA; GO:0048638,regulation of developmental growth
gene-LOC100192589	GO:0000786,nucleosome; GO:0005634,nucleus; GO:0003677,DNA binding; GO:0046982,protein heterodimerization activity
gene-LOC100192590	GO:0016021,integral component of membrane; GO:0005886,plasma membrane
gene-LOC100192592	GO:0070522,ERCC4-ERCC1 complex; GO:0000110,nucleotide-excision repair factor 1 complex; GO:0017108,5'-flap endonuclease activity; GO:0003684,damaged DNA binding; GO:0003697,single-stranded DNA binding; GO:0000014,single-stranded DNA endodeoxyribonuclease activity; GO:0000724,double-strand break repair via homologous recombination; GO:0000710,meiotic mismatch repair; GO:0006312,mitotic recombinati…
gene-LOC100192593	GO:0005739,mitochondrion; GO:0003723,RNA binding; GO:0000179,rRNA (adenine-N6,N6-)-dimethyltransferase activity; GO:0046085,adenosine metabolic process
gene-LOC100192594	GO:0005783,endoplasmic reticulum; GO:0005789,endoplasmic reticulum membrane; GO:0005794,Golgi apparatus; GO:0016021,integral component of membrane; GO:0005886,plasma membrane; GO:0050291,sphingosine N-acyltransferase activity; GO:0046513,ceramide biosynthetic process; GO:0042759,long-chain fatty acid biosynthetic process; GO:0002238,response to molecule of fungal origin
gene-LOC100192595	GO:0047631,ADP-ribose diphosphatase activity; GO:0046872,metal ion binding; GO:0051287,NAD binding; GO:0000210,NAD+ diphosphatase activity; GO:0006979,response to oxidative stress
gene-LOC100192596	GO:0000243,commitment complex; GO:0071010,prespliceosome; GO:0005685,U1 snRNP; GO:0030627,pre-mRNA 5'-splice site binding; GO:0008270,zinc ion binding; GO:0000395,mRNA 5'-splice site recognition; GO:0000387,spliceosomal snRNP assembly
gene-LOC100192597	GO:0016020,membrane; GO:0009737,response to abscisic acid
gene-LOC100192598	GO:0031225,anchored component of membrane; GO:0046658,anchored component of plasma membrane; GO:0005886,plasma membrane; GO:0042973,glucan endo-1,3-beta-D-glucosidase activity; GO:0004553,hydrolase activity, hydrolyzing O-glycosyl compounds; GO:0030247,polysaccharide binding; GO:0005975,carbohydrate metabolic process; GO:0006952,defense response
gene-LOC100192599	GO:0098807,chloroplast thylakoid membrane protein complex; GO:0005576,extracellular region; GO:0016021,integral component of membrane; GO:0008061,chitin binding; GO:0004568,chitinase activity; GO:0006032,chitin catabolic process
gene-LOC100192600	GO:0015935,small ribosomal subunit; GO:0003735,structural constituent of ribosome; GO:0006412,translation
gene-LOC100192602	GO:0016021,integral component of membrane; GO:0005887,integral component of plasma membrane; GO:0008515,sucrose transmembrane transporter activity; GO:0051119,sugar transmembrane transporter activity; GO:0015770,sucrose transport
gene-LOC100192603	GO:0005576,extracellular region; GO:0020037,heme binding; GO:0046872,metal ion binding; GO:0004601,peroxidase activity; GO:0042744,hydrogen peroxide catabolic process; GO:0006979,response to oxidative stress
gene-LOC100192604	GO:0005634,nucleus; GO:0008289,lipid binding; GO:0043565,sequence-specific DNA binding; GO:0006355,regulation of transcription, DNA-templated; GO:0006351,transcription, DNA-templated
gene-LOC100192605	GO:0016021,integral component of membrane; GO:0035265,organ growth
gene-LOC100192606	GO:0009706,chloroplast inner membrane; GO:0005516,calmodulin binding; GO:0016491,oxidoreductase activity; GO:0015031,protein transport
gene-LOC100192607	GO:0032578,aleurone grain membrane; GO:0005773,vacuole; GO:0005509,calcium ion binding
gene-LOC100192609	GO:0005634,nucleus; GO:0000981,DNA-binding transcription factor activity, RNA polymerase II-specific; GO:0043565,sequence-specific DNA binding; GO:0001135,RNA polymerase II transcription regulator recruiting activity; GO:0044212,transcription regulatory region DNA binding; GO:0030154,cell differentiation; GO:1901002,positive regulation of response to salt stress; GO:1902584,positive regulation of…
gene-LOC100192611	GO:0005794,Golgi apparatus; GO:0000139,Golgi membrane; GO:0016021,integral component of membrane; GO:0008375,acetylglucosaminyltransferase activity; GO:0015020,glucuronosyltransferase activity; GO:0009826,unidimensional cell growth
gene-LOC100192615	GO:0005576,extracellular region; GO:0016298,lipase activity; GO:0016042,lipid catabolic process
gene-LOC100192616	GO:0008270,zinc ion binding
gene-LOC100192620	GO:0016021,integral component of membrane
gene-LOC100192625	GO:0022625,cytosolic large ribosomal subunit; GO:0005783,endoplasmic reticulum; GO:0009506,plasmodesma; GO:0005773,vacuole; GO:0003723,RNA binding; GO:0003735,structural constituent of ribosome; GO:0042273,ribosomal large subunit biogenesis; GO:0006412,translation
gene-LOC100192626	GO:0005829,cytosol; GO:0005789,endoplasmic reticulum membrane; GO:0012507,ER to Golgi transport vesicle membrane; GO:0016021,integral component of membrane; GO:0005770,late endosome; GO:0031902,late endosome membrane; GO:0000325,plant-type vacuole; GO:0031201,SNARE complex; GO:0005802,trans-Golgi network; GO:0005774,vacuolar membrane; GO:0005773,vacuole; GO:0005484,SNAP receptor activity; GO:0000…
gene-LOC100192627	GO:0005634,nucleus; GO:0003677,DNA binding; GO:0008289,lipid binding; GO:0006355,regulation of transcription, DNA-templated; GO:0006351,transcription, DNA-templated
gene-LOC100192628	GO:0009706,chloroplast inner membrane; GO:0009535,chloroplast thylakoid membrane; GO:0010027,thylakoid membrane organization; GO:0016032,viral process
gene-LOC100192629	GO:0008168,methyltransferase activity
gene-LOC100192631	GO:0016021,integral component of membrane; GO:0020037,heme binding; GO:0036190,indole-2-monooxygenase activity; GO:0005506,iron ion binding
gene-LOC100192632	GO:0005794,Golgi apparatus; GO:0000139,Golgi membrane; GO:0016021,integral component of membrane; GO:0048531,beta-1,3-galactosyltransferase activity; GO:0006486,protein glycosylation
gene-LOC100192634	GO:0005634,nucleus; GO:0003682,chromatin binding; GO:0003677,DNA binding; GO:0006355,regulation of transcription, DNA-templated; GO:0006351,transcription, DNA-templated
gene-LOC100192635	GO:0009269,response to desiccation
gene-LOC100192636	GO:0005829,cytosol; GO:0005524,ATP binding; GO:0016887,ATPase activity; GO:0005215,transporter activity; GO:0042742,defense response to bacterium; GO:0046686,response to cadmium ion
gene-LOC100192638	GO:0016021,integral component of membrane; GO:0015267,channel activity; GO:0015840,urea transport
gene-LOC100192639	GO:0016021,integral component of membrane
gene-LOC100192643	GO:0005634,nucleus; GO:0003700,DNA-binding transcription factor activity; GO:0042802,identical protein binding; GO:0046982,protein heterodimerization activity; GO:0042803,protein homodimerization activity; GO:0043565,sequence-specific DNA binding; GO:0044212,transcription regulatory region DNA binding; GO:0071555,cell wall organization; GO:0071365,cellular response to auxin stimulus; GO:0050832,d…
gene-LOC100192644	GO:0005886,plasma membrane; GO:0005524,ATP binding; GO:0004675,transmembrane receptor protein serine/threonine kinase activity; GO:0009742,brassinosteroid mediated signaling pathway; GO:0007166,cell surface receptor signaling pathway; GO:0050832,defense response to fungus; GO:0045087,innate immune response; GO:0006468,protein phosphorylation
gene-LOC100192645	GO:0003723,RNA binding
gene-LOC100192646	GO:0005856,cytoskeleton; GO:0005634,nucleus; GO:0009524,phragmoplast; GO:0005524,ATP binding; GO:0004709,MAP kinase kinase kinase activity; GO:0000919,cell plate assembly; GO:0006952,defense response
gene-LOC100192647	GO:0005737,cytoplasm; GO:0016021,integral component of membrane; GO:0030797,24-methylenesterol C-methyltransferase activity; GO:0008757,S-adenosylmethionine-dependent methyltransferase activity; GO:0032259,methylation; GO:0016126,sterol biosynthetic process
gene-LOC100192650	GO:0005634,nucleus; GO:0003677,DNA binding; GO:0003700,DNA-binding transcription factor activity; GO:0006351,transcription, DNA-templated
gene-LOC100192652	GO:0009507,chloroplast; GO:0045300,acyl-[acyl-carrier-protein] desaturase activity; GO:0046872,metal ion binding; GO:0102786,stearoyl-[acp] desaturase activity; GO:0006952,defense response; GO:0006633,fatty acid biosynthetic process
gene-LOC100192654	GO:0005829,cytosol; GO:0009506,plasmodesma; GO:0008430,selenium binding; GO:0071291,cellular response to selenium ion; GO:0046686,response to cadmium ion; GO:0042542,response to hydrogen peroxide; GO:0000103,sulfate assimilation
gene-LOC100192658	GO:0005634,nucleus; GO:0003700,DNA-binding transcription factor activity; GO:0043565,sequence-specific DNA binding; GO:0006952,defense response; GO:0006351,transcription, DNA-templated
gene-LOC100192661	GO:0005737,cytoplasm; GO:0005634,nucleus; GO:0005886,plasma membrane; GO:0005524,ATP binding; GO:0005509,calcium ion binding; GO:0009931,calcium-dependent protein serine/threonine kinase activity; GO:0005516,calmodulin binding; GO:0004683,calmodulin-dependent protein kinase activity; GO:0009738,abscisic acid-activated signaling pathway; GO:0035556,intracellular signal transduction; GO:0018105,pep…
gene-LOC100192663	GO:0016788,hydrolase activity, acting on ester bonds; GO:0016042,lipid catabolic process
[truncated: 27,778 more rows]

## Sheet: TableS4
Table S4 Unigenes GO databases annotation of sweet corn after application of B. subtilis R31.
[truncated: 24,868 more rows]

[truncated: 16 more sheets: TableS5, TableS6, Tables7, Tables8, TableS9, TableS10, TableS11, TableS12, TableS13, TableS14, TableS15, TableS16, TableS17, TableS18, TableS19, TableS20]
