# Supplementary material for: Biocontrol endophytes Bacillus subtilis R31 influence the quality, transcriptome and metabolome of sweet corn
Source: PeerJ. 2023 Mar 2;11:e14967. doi: 10.7717/peerj.14967 (PMC9985898; doi:10.7717/peerj.14967)
Supplement: Supplemental Information 3 [file peerj-11-14967-s003.xlsx]

## Sheet: Sheet2
	ear length	ear diameter	bald head	fresh weight of single bud	net weight of single ear
CK	17.2	4.61	3.7	372	239.5
	16.1	4.86	0	381	247			sweetness	CK	r31
	19.1	4.71	1.9	15.7	16.7				16	16
	17.3	4.74	0	398	266				15.9	16
	17.3	4.65	4.4	428	243				16.2	17.3
	19	4.5	0	316	221				17.3	17.2
	17.4	4.88	0	415	287				16.6	16
	16.8	5.09	0	426	256				15.9	16.7
	17.8	4.09	0	471	291				16.9
	18.5	4.54	0	194	173				16.3
	21	5.42	2.5	352.5	210
average	17.9545	4.73545	1.13636	342.655	222.745
sweet corn treated with B. subtilis R31	20.1	4.61	2.5	387	273
	18	5.19	0	406.5	298			average	16.3875	16.5333
	20.1	4.7	0	387	273			STDEV	0.508324	0.618601
	18	5.05	1.8	395	248.5
	18	5	0	438	287.5
	18.6	4.49	0	351.5	227.5
	17	5.1	0	440.5	276.5
	18.5	5.1	0	346.5	285
	17	5.1	0	432	267
	18	5.3	0	448	284
	17.5	5.1	0	411	273
average	18.2545	4.97636	0.390909	403.909	272.091
STDEV	1.04725	0.257809	0.883691	34.6192	19.519
ck-STDEV	1.36041	0.341273	1.69427	130.819	76.2484
